# Supplementary material
Source: publisher figshare collection journal article supplement (https://karger.figshare.com/ndownloader/files/28240707)
Supplement: Supplementary file 1 [file 28240707]

## Sheet: Non-survivor proteins COGs
A bau ATCC19606 Locus tag	Locus	Protein product	Length	Protein Name	Start	Stop	Strand	patro protein	ecuti89 protein	bceno protein	pchl protein	A bau ATCC17978 Locus tag	COG number	COG category	description	pathway	COG database name
FQU82_RS00170	cybC	WP_000987632.1	130	MULTISPECIES: cytochrome b562	10954	11346	-	WP_043878052.1	WP_001232246.1	one_way	one_way	AUO97_RS07345	COG3783	C	Solublecytochromeb562		CybC
FQU82_RS00260		WP_000823197.1	386	glutathionylspermidine synthase family protein	28499	29659	-	WP_011091958.1	WP_000442855.1	no_hit	one_way	AUO97_RS07260	COG0754	E	Glutathionylspermidinesynthase,CHAPdomain		Gsp
FQU82_RS00755		WP_001056778.1	267	MULTISPECIES: DUF4942 domain-containing protein	114626	115429	-	WP_011094385.1	WP_001280460.1	no_hit	no_hit	no_hit
FQU82_RS00915	dld	WP_001193008.1	568	D-lactate dehydrogenase	151224	152930	+	WP_011094703.1	WP_000097372.1	one_way	no_hit	AUO97_RS06850	COG0277	C	FAD/FMN-containinglactatedehydrogenase/glycolateoxidase		GlcD
FQU82_RS01030		WP_001078193.1	124	MULTISPECIES: ribonuclease E inhibitor RraB	177712	178086	+	WP_011092015.1	WP_000002952.1	no_hit	no_hit	AUO97_RS06735
FQU82_RS01165		WP_000369415.1	621	alpha/beta fold hydrolase	214467	216332	+	WP_011094207.1	WP_001136572.1	one_way	one_way	AUO97_RS06600	COG0596	H	2-succinyl-6-hydroxy-2,4-cyclohexadiene-1-carboxylatesynthaseMenHandrelatedesterases,alpha/betahydrolasefold	Menaquinonebiosynthesis	MenH
FQU82_RS01270		WP_000623106.1	565	MULTISPECIES: NAD-dependent malic enzyme	232328	234025	+	WP_011094365.1	WP_000433462.1	one_way	one_way	AUO97_RS06495	COG0281	C	Malicenzyme	Ureacycle	SfcA
FQU82_RS01510	mdtD	WP_000994604.1	463	multidrug transporter subunit MdtD	278081	279472	-	WP_011094709.1	WP_000130864.1	one_way	one_way	AUO97_RS06250	COG2814	G	PredictedarabinoseeffluxpermeaseAraJ,MFSfamily		AraJ
FQU82_RS01795		WP_000269792.1	379	histidine kinase	340132	341271	+	WP_011093984.1	WP_000544377.1	one_way	one_way	AUO97_RS08740	COG3275	T	Sensorhistidinekinase,LytS/YehUfamily		LytS
FQU82_RS01840		WP_000870031.1	278	MULTISPECIES: general secretion pathway protein	347959	348795	+	WP_011094634.1	WP_001350730.1	one_way	no_hit	AUO97_RS08785	COG3031	U	TypeIIsecretorypathway,componentPulC		PulC
FQU82_RS02075		WP_001072477.1	333	MULTISPECIES: HlyD family secretion protein	397233	398234	+	WP_011091912.1	WP_000854033.1	one_way	one_way	AUO97_RS09025	COG1566	V	MultidrugresistanceeffluxpumpEmrA		EmrA
FQU82_RS03005		WP_000669565.1	183	MULTISPECIES: phosphatase PAP2 family protein	600681	601232	+	WP_011093510.1	WP_001256553.1	one_way	one_way	AUO97_RS09910	COG0671	I	Membrane-associatedphospholipidphosphatase	Phospholipidbiosynthesis	PgpB
FQU82_RS03095		WP_002027450.1	267	MULTISPECIES: enoyl-ACP reductase	615810	616613	+	WP_011093536.1	WP_000506490.1	one_way	one_way	AUO97_RS10095	COG0623	I	Enoyl-[acyl-carrier-protein]reductaseFabI	Fattyacidbiosynthesis	FabI
FQU82_RS03915		WP_001147032.1	473	MULTISPECIES: sensor domain-containing diguanylate cyclase	789335	790756	-	WP_011092275.1	WP_000558461.1	one_way	one_way	AUO97_RS10950	COG2199	T	GGDEFdomain,diguanylatecyclase(c-di-GMPsynthetase)oritsenzymaticallyinactivevariants		GGDEF
FQU82_RS04235		WP_000550441.1	220	elongation factor P hydroxylase	861328	861990	-	WP_011094590.1	WP_001089236.1	no_hit	one_way	AUO97_RS11275	COG3101	J	ElongationfactorPhydroxylaseEpmC(EF-Pbeta-lysylationpathway)		EpmC
FQU82_RS04800	cas1f	WP_000080845.1	317	type I-F CRISPR-associated endonuclease Cas1	974288	975241	-	WP_011095179.1	WP_000097881.1	no_hit	no_hit	no_hit
FQU82_RS04810	csy3	WP_000151792.1	353	type I-F CRISPR-associated protein Csy3	975864	976925	-	WP_011095183.1	WP_001029748.1	no_hit	one_way	no_hit
FQU82_RS04830	cas3f	WP_000558149.1	1078	type I-F CRISPR-associated helicase Cas3	980002	983238	+	WP_011095180.1	WP_001101565.1	no_hit	no_hit	AUO97_RS08460	COG4783	M	Outermembraneproteinchaperone/metalloproteaseBepA/YfgC,containsM48andTPRdomains		BepA
FQU82_RS04930		WP_000189497.1	504	DUF2235 domain-containing protein	1000819	1002333	+	WP_011092336.1	WP_000816460.1	no_hit	no_hit	no_hit
FQU82_RS05320		WP_000697203.1	162	MULTISPECIES: esterase	1089584	1090072	-	WP_011093387.1	WP_000587933.1	one_way	one_way	AUO97_RS12200	COG3150	R	PredictedesteraseYcpF,UPF0227family		YcfP
FQU82_RS05380		WP_000749178.1	159	MULTISPECIES: copper resistance protein NlpE N-terminal domain-containing protein	1104392	1104871	-	WP_039294768.1	WP_000239186.1	one_way	no_hit	AUO97_RS12260	COG3015	M	UncharacterizedlipoproteinNlpEinvolvedincopperresistance		CutF
FQU82_RS05705		WP_000301495.1	446	MULTISPECIES: DUF4055 domain-containing protein	1156364	1157704	+	WP_011093915.1	WP_000094544.1	no_hit	no_hit	AUO97_RS18150
FQU82_RS05755		WP_000540685.1	65	MULTISPECIES: hypothetical protein	1162625	1162822	+	WP_010297658.1	WP_000373624.1	one_way	one_way	AUO97_RS06670	COG0365	I	Acyl-coenzymeAsynthetase/AMP-(fatty)acidligase		Acs
FQU82_RS06195		WP_000362163.1	198	MULTISPECIES: putative adenosine monophosphate-protein transferase Fic	1244037	1244633	-	WP_011094960.1	WP_001280656.1	no_hit	no_hit	no_hit
FQU82_RS06245		WP_001153950.1	362	DUF898 domain-containing protein	1259051	1260139	-	WP_011092017.1	WP_001000687.1	no_hit	no_hit	no_hit
FQU82_RS06270		WP_000721818.1	122	MULTISPECIES: DUF4810 domain-containing protein	1264792	1265160	+	WP_011093629.1	WP_001298464.1	no_hit	no_hit	AUO97_RS03535	COG0782	K	Transcriptionelongationfactor,GreA/GreBfamily		GreA
FQU82_RS07180		WP_000072673.1	71	MULTISPECIES: cold-shock protein	1449828	1450043	+	WP_005976270.1	WP_000034825.1	one_way	one_way	AUO97_RS13565	COG1278	K	Coldshockprotein,CspAfamily		CspC
FQU82_RS07260		WP_000787873.1	207	hypothetical protein	1462030	1462653	+	WP_010279363.1	WP_000106474.1	no_hit	no_hit	AUO97_RS17970
FQU82_RS07500		WP_001171606.1	337	site-specific integrase	1503820	1504833	-	WP_011094182.1	WP_000023738.1	one_way	one_way	AUO97_RS15460	COG4974	L	Site-specificrecombinaseXerD		XerD
FQU82_RS07700		WP_000756788.1	225	HAD-IA family hydrolase	1547486	1548163	-	WP_011095451.1	WP_000870712.1	one_way	one_way	AUO97_RS13800	COG1011	H	FMNand5-amino-6-(5-phospho-D-ribitylamino)uracilphosphataseYigB,HADsuperfamily(riboflavinbiosynthesis)		YigB
FQU82_RS08240		WP_000750380.1	389	hypothetical protein	1670833	1672002	+	WP_011092429.1	WP_000628251.1	one_way	one_way	AUO97_RS11445
FQU82_RS08280		WP_000816408.1	345	putative 2-aminoethylphosphonate ABC transporter substrate-binding protein	1678860	1679897	+	WP_011094003.1	WP_000759310.1	one_way	one_way	AUO97_RS14310	COG1840	P	ABC-typeFe3+transportsystem,periplasmiccomponent		AfuA
FQU82_RS08565		WP_001983993.1	1157	response regulator	1744410	1747883	+	WP_011091946.1	WP_000809780.1	one_way	one_way	AUO97_RS14495	COG1457	F	Purine-cytosinepermeaseorrelatedprotein		CodB
FQU82_RS08655	yghU	WP_001285216.1	286	glutathione-dependent disulfide-bond oxidoreductase	1762456	1763316	-	WP_011093149.1	WP_001331683.1	one_way	one_way	AUO97_RS14575	COG0625	O	GlutathioneS-transferase		GstA
FQU82_RS08860	arsC	WP_000138016.1	142	MULTISPECIES: arsenate reductase (glutaredoxin)	1803602	1804030	-	WP_011093181.1	WP_000065791.1	one_way	one_way	AUO97_RS14780	COG1393	P	Arsenatereductaseorrelatedprotein,glutaredoxinfamily		ArsC
FQU82_RS08975	ygaH	WP_001047284.1	113	MULTISPECIES: L-valine transporter subunit YgaH	1831579	1831920	-	WP_011095015.1	WP_000119759.1	no_hit	no_hit	AUO97_RS14895
FQU82_RS09570		WP_001192280.1	303	lysine exporter LysO family protein	1946200	1947111	-	WP_011094204.1	WP_000491135.1	no_hit	no_hit	AUO97_RS15440	COG2431	E	LysineexportproteinLysO/YbjE,DUF340family		LysO
FQU82_RS09950		WP_001036884.1	340	HlyD family efflux transporter periplasmic adaptor subunit	2031846	2032868	+	WP_011092046.1	WP_024250943.1	one_way	one_way	AUO97_RS16085	COG1566	V	MultidrugresistanceeffluxpumpEmrA		EmrA
FQU82_RS10110		WP_000642305.1	352	2,3-butanediol dehydrogenase	2062517	2063575	+	WP_011095843.1	WP_000106007.1	one_way	one_way	AUO97_RS16280	COG1063	E	ThreoninedehydrogenaseorrelatedZn-dependentdehydrogenase	Non-phosphorylatedEntner-Doudoroffpathway	Tdh
FQU82_RS10245		WP_000095308.1	390	thiolase family protein	2091846	2093018	-	WP_011092870.1	WP_000786536.1	one_way	one_way	AUO97_RS16415	COG0183	I	Acetyl-CoAacetyltransferase	Fattyacidbiosynthesis	PaaJ
FQU82_RS10380		WP_001257946.1	256	SDR family oxidoreductase	2118892	2119662	+	WP_011092101.1	WP_000347625.1	one_way	one_way	AUO97_RS01795	COG1028	I	NAD(P)-dependentdehydrogenase,short-chainalcoholdehydrogenasefamily	Fattyacidbiosynthesis	FabG
FQU82_RS10620		WP_001044483.1	387	hypothetical protein	2173879	2175042	-	WP_011095486.1	WP_001122785.1	no_hit	no_hit	AUO97_RS16660
FQU82_RS10755		WP_000413224.1	336	iron ABC transporter permease	2202639	2203649	-	WP_011094619.1	WP_001261263.1	one_way	one_way	AUO97_RS16755	COG0609	P	ABC-typeFe3+-siderophoretransportsystem,permeasecomponent		FepD
FQU82_RS10760		WP_000770275.1	339	ABC transporter substrate-binding protein	2203652	2204671	-	WP_039293404.1	WP_000778018.1	one_way	one_way	AUO97_RS16760	COG0614	P	ABC-typeFe3+-hydroxamatetransportsystem,periplasmiccomponent		FepB
FQU82_RS11035		WP_000029959.1	238	FadR family transcriptional regulator	2268607	2269323	+	WP_011095878.1	WP_000174305.1	one_way	one_way	AUO97_RS17050	COG2186	K	DNA-bindingtranscriptionalregulator,FadRfamily		FadR
FQU82_RS11415		WP_000885657.1	383	phospholipase A	2349364	2350515	-	WP_011095644.1	WP_001259692.1	no_hit	one_way	AUO97_RS17430	COG2829	M	OutermembranephospholipaseA		PldA
FQU82_RS11465		WP_086221468.1	99	MULTISPECIES: cyd operon YbgE family protein	2361446	2361745	+	WP_011092953.1	WP_000034602.1	one_way	no_hit	AUO97_RS17480	COG3790	S	Predictedmembraneprotein,encodedincydABoperon		YbgE
FQU82_RS12000		WP_000017875.1	385	iron-containing alcohol dehydrogenase	2467253	2468410	+	WP_011095263.1	WP_000234743.1	one_way	one_way	AUO97_RS18365	COG1454	C	Alcoholdehydrogenase,classIV		EutG
FQU82_RS12065	tal	WP_000149851.1	329	MULTISPECIES: transaldolase	2483028	2484017	+	WP_011092465.1	WP_001003713.1	one_way	one_way	AUO97_RS18425	COG0176	G	Transaldolase/fructose-6-phosphatealdolase	Pentosephosphatepathway	TalA
FQU82_RS12250	thiM	WP_000204869.1	275	hydroxyethylthiazole kinase	2522415	2523242	+	WP_011094718.1	WP_001195614.1	no_hit	one_way	AUO97_RS18600	COG2145	H	Hydroxyethylthiazolekinase,sugarkinasefamily	Thiaminebiosynthesis	ThiM
FQU82_RS12380		WP_000880860.1	150	MULTISPECIES: DUF441 domain-containing protein	2548631	2549083	+	WP_011092854.1	WP_000460707.1	no_hit	no_hit	AUO97_RS18730	COG2707	S	Uncharacterizedmembraneprotein,DUF441family		YeaL
FQU82_RS12445		WP_000789247.1	182	MULTISPECIES: DUF2799 domain-containing protein	2567727	2568275	-	WP_043878195.1	WP_001296308.1	no_hit	no_hit	AUO97_RS18800
FQU82_RS12595		WP_001167812.1	251	RDD family protein	2603955	2604710	+	WP_039290501.1	WP_001078373.1	no_hit	no_hit	AUO97_RS18955
FQU82_RS13215		WP_000195376.1	486	aminoacyl-histidine dipeptidase	2718935	2720395	-	WP_011094975.1	WP_001292999.1	one_way	one_way	AUO97_RS00280	COG2195	E	Di-ortripeptidase		PepD2
FQU82_RS13235		WP_001983601.1	314	alpha/beta hydrolase	2724726	2725670	+	WP_011094807.1	WP_000271277.1	no_hit	no_hit	AUO97_RS00300	COG2819	R	Predictedhydrolaseofthealpha/betasuperfamily		YbbA
FQU82_RS13415		WP_000216716.1	184	glycoside hydrolase family protein	2763558	2764112	-	WP_162837365.1	WP_001135277.1	one_way	no_hit	AUO97_RS15710	COG3772	M	Phage-relatedlysozyme(muramidase),GH24family		RrrD
FQU82_RS14015		WP_000066134.1	231	Smr/MutS family protein	2866080	2866775	+	WP_011094595.1	WP_000730806.1	one_way	one_way	AUO97_RS00720	COG2840	L	DNA-nickingendonuclease,Smrdomain		SmrA
FQU82_RS14065		WP_000498093.1	415	murein L,D-transpeptidase	2878589	2879836	+	WP_043878009.1	WP_001056384.1	one_way	one_way	AUO97_RS00770	COG1376	M	Lipoprotein-anchoringtranspeptidaseErfK/SrfK		ErfK
FQU82_RS14130	bauB	WP_001104129.1	322	siderophore-binding periplasmic lipoprotein BauB	2896969	2897937	-	WP_011092674.1	WP_001234311.1	one_way	one_way	AUO97_RS00830	COG4607	P	ABC-typeenterochelintransportsystem,periplasmiccomponent		CeuA
FQU82_RS14135	bauE	WP_000582118.1	256	MULTISPECIES: ferric acinetobactin ABC transporter ATP-binding protein BauE	2897944	2898714	-	WP_011094828.1	WP_001158929.1	one_way	one_way	AUO97_RS00835	COG4604	P	ABC-typeenterochelintransportsystem,ATPasecomponent		CeuD
FQU82_RS14285	dacC	WP_000197255.1	382	MULTISPECIES: D-alanyl-D-alanine carboxypeptidase PBP5/6	2933823	2934971	+	WP_011092887.1	WP_001092082.1	one_way	one_way	AUO97_RS01065	COG1686	M	D-alanyl-D-alaninecarboxypeptidase		DacC
FQU82_RS14905	tolR	WP_001007562.1	150	MULTISPECIES: protein TolR	3069282	3069734	+	WP_011092956.1	WP_000090097.1	one_way	one_way	AUO97_RS01870	COG0848	U	BiopolymertransportproteinExbD		ExbD
FQU82_RS14990	sppA	WP_001286607.1	338	signal peptide peptidase SppA	3086152	3087168	-	WP_011093896.1	WP_001259835.1	one_way	one_way	AUO97_RS01955	COG0616	O	Periplasmicserineprotease,ClpPclass		SppA
FQU82_RS15125		WP_000070815.1	468	MULTISPECIES: amino acid permease	3117224	3118630	-	WP_011094416.1	WP_000228366.1	one_way	one_way	AUO97_RS02080	COG1113	E	L-asparaginetransporterorrelatedpermease		AnsP
FQU82_RS15140	genX	WP_000059546.1	324	EF-P lysine aminoacylase GenX	3121627	3122601	-	WP_011095462.1	WP_000004771.1	one_way	one_way	AUO97_RS02095	COG2269	J	ElongationfactorP--beta-lysineligase(EF-Pbeta-lysylationpathway)		EpmA
FQU82_RS15415		WP_000966781.1	145	MULTISPECIES: universal stress protein	3193923	3194360	+	WP_011091695.1	WP_000323571.1	one_way	one_way	AUO97_RS02430	COG0589	T	Nucleotide-bindinguniversalstressprotein,UspAfamily		UspA
FQU82_RS15755		WP_000397562.1	153	MULTISPECIES: NfeD family protein	3284897	3285358	+	WP_011092786.1	WP_000970318.1	no_hit	no_hit	AUO97_RS02770	COG1585	O	Membraneproteinimplicatedinregulationofmembraneproteaseactivity		YbbJ
FQU82_RS15765		WP_001012948.1	122	MULTISPECIES: MmcQ/YjbR family DNA-binding protein	3286309	3286677	-	WP_011093170.1	WP_000360950.1	no_hit	one_way	AUO97_RS02780	COG2315	K	PredictedDNA-bindingproteinwithëdouble-wingístructuralmotif,MmcQ/YjbRfamily		MmcQ
FQU82_RS17340		WP_000013717.1	84	MULTISPECIES: PspC domain-containing protein	3598663	3598917	+	WP_011093547.1	WP_000907391.1	one_way	one_way	AUO97_RS04570	COG1983	K	PhageshockproteinPspC(stress-responsivetranscriptionalregulator)		PspC
FQU82_RS17515		WP_001189303.1	122	MULTISPECIES: hypothetical protein	3636926	3637294	-	WP_011094538.1	WP_000020034.1	no_hit	one_way	AUO97_RS04755
FQU82_RS17645		WP_000090000.1	127	MULTISPECIES: RidA family protein	3661617	3662000	+	WP_011092010.1	WP_000047539.1	one_way	one_way	AUO97_RS04880	COG0251	V	EnaminedeaminaseRidA,housecleaningofreactiveenamineintermediates,YjgF/YER057c/UK114family	Pyrimidinedegradation	RidA
FQU82_RS18130		WP_000114353.1	140	MULTISPECIES: GFA family protein	3758856	3759278	-	WP_011095673.1	WP_000217276.1	no_hit	no_hit	AUO97_RS05420	COG3791	S	Uncharacterizedconservedprotein
FQU82_RS18905		WP_000349489.1	279	MULTISPECIES: formate/nitrite transporter family protein	3936640	3937479	+	WP_011094608.1	WP_000368123.1	no_hit	no_hit	AUO97_RS07600	COG2116	P	Formate/nitritetransporterFocA,FNTfamily		FocA
FQU82_RS18960		WP_000069843.1	342	NAD(P)-dependent alcohol dehydrogenase	3945060	3946088	+	WP_011094719.1	WP_001555771.1	one_way	one_way	AUO97_RS07545	COG1064	G	D-arabinose1-dehydrogenase,Zn-dependentalcoholdehydrogenasefamily		AdhP

## Sheet: A bau ATCC17978 COGs
A bau ATCC17978 Locus tag	COG number	COG category	description	pathway	COG database name
AUO97_RS00010	COG2207	K	AraC-typeDNA-bindingdomainandAraC-containingproteins		AraC
AUO97_RS00015	COG1280	E	Threonine/homoserine/homoserinelactoneeffluxprotein		RhtB
AUO97_RS00020
AUO97_RS00025
AUO97_RS00030	COG3111	S	PredictedperiplasmicproteinYdeIwithOB-fold,BOFfamily		YdeI
AUO97_RS00035	COG1215	N	Glycosyltransferase,catalyticsubunitofcellulosesynthaseandpoly-beta-1,6-N-acetylglucosaminesynthase		BcsA
AUO97_RS00040	COG2230	I	Cyclopropanefatty-acyl-phospholipidsynthaseandrelatedmethyltransferases		Cfa
AUO97_RS00045	COG2120	G	N-acetylglucosaminyldeacetylase,LmbEfamily		LmbE
AUO97_RS00050
AUO97_RS00055	COG3798	S	Uncharacterizedconservedprotein,DUF2171domain
AUO97_RS00060	COG1113	E	L-asparaginetransporterorrelatedpermease		AnsP
AUO97_RS00065	COG1012	I	Acyl-CoAreductaseorotherNAD-dependentaldehydedehydrogenase	Prolinedegradation	AdhE
AUO97_RS00070	COG0161	H	Adenosylmethionine-8-amino-7-oxononanoateaminotransferase	Biotinbiosynthesis	BioA
AUO97_RS00070	COG0161	H	Adenosylmethionine-8-amino-7-oxononanoateaminotransferase	Biotinbiosynthesis	BioA
AUO97_RS00075	COG0583	K	DNA-bindingtranscriptionalregulator,LysRfamily		LysR
AUO97_RS00100	COG0515	T	Serine/threonineproteinkinase		SPS1
AUO97_RS00105	COG1752	R	Predictedacylesterase/phospholipaseRssA,containdpatatindomain		RssA
AUO97_RS00110	COG2607	R	PredictedATPase,AAA+superfamily		Atu1564
AUO97_RS00120	COG0533	J	tRNAA37threonylcarbamoyltransferaseTsaD	tRNAmodification	TsaD
AUO97_RS00125	COG0828	J	RibosomalproteinS21	Ribosome30Ssubunit	RpsU
AUO97_RS00130	COG1610	R	UncharacterizedconservedproteinYqeY,mayhavetRNAaminoacidamidaseactivity		YqeY
AUO97_RS00135	COG4783	M	Outermembraneproteinchaperone/metalloproteaseBepA/YfgC,containsM48andTPRdomains		BepA
AUO97_RS00135	COG4783	M	Outermembraneproteinchaperone/metalloproteaseBepA/YfgC,containsM48andTPRdomains		BepA
AUO97_RS00140	COG1052	C	Lactatedehydrogenaseorrelated2-hydroxyaciddehydrogenase	Pyridoxalphosphatebiosynthesis	LdhA
AUO97_RS00145
AUO97_RS00150	COG0501	O	Zn-dependentproteasewithchaperonefunction		HtpX
AUO97_RS00155	COG0034	F	Glutaminephosphoribosylpyrophosphateamidotransferase	Purinebiosynthesis	PurF
AUO97_RS00160	COG1286	F	ColicinVproductionaccessoryproteinCvpA,regulatorofpurFexpressionandbiofilmformation		CvpA
AUO97_RS00165	COG0167	F	Dihydroorotatedehydrogenase	Pyrimidinebiosynthesis	PyrD
AUO97_RS00170
AUO97_RS00175	COG3297	U	TypeIIsecretorypathway,componentPulL		PulL
AUO97_RS00180	COG2062	T	PhosphohistidinephosphataseSixA		SixA
AUO97_RS00185	COG0240	C	Glycerol-3-phosphatedehydrogenase	Isoprenoidbiosynthesis	GpsA
AUO97_RS00190	COG0778	C	Nitroreductase	Pyrimidinedegradation	NfnB
AUO97_RS00195
AUO97_RS00200	COG0513	L	SuperfamilyIIDNAandRNAhelicase		SrmB
AUO97_RS00205	COG1278	K	Coldshockprotein,CspAfamily		CspC
AUO97_RS00210	COG0425	J	SulfurcarrierproteinTusA(tRNAthiolation,molybdenumcofactorbiosynthesis)		TusA
AUO97_RS00215	COG0568	K	DNA-directedRNApolymerase,sigmasubunit(sigma70/sigma32)	RNApolymerase	RpoD
AUO97_RS00220	COG2363	S	UncharacterizedmembraneproteinYgdD,TMEM256/DUF423family		YgdD
AUO97_RS00225	COG2104	H	SulfurcarrierproteinThiS(thiaminebiosynthesis)	Thiaminebiosynthesis	ThiS
AUO97_RS00230	COG2022	H	ThiazolesynthaseThiGH,ThiGsubunit(thiaminbiosynthesis)	Thiaminebiosynthesis	ThiG
AUO97_RS00235	COG4339	R	Predictedmetal-dependentphosphohydrolase,HDsuperfamily
AUO97_RS00240	COG3022	L	DNA-bindingproteinYaaAassociatedwiththeoxidativestressresponse		YaaA
AUO97_RS00245	COG2945	R	Alpha/betasuperfamilyhydrolase
AUO97_RS00255	COG1234	J	RibonucleaseBN,tRNAprocessingenzyme		ElaC
AUO97_RS00260	COG1690	J	RNA-splicingligaseRtcB,repairstRNAdamage		RtcB
AUO97_RS00280	COG2195	E	Di-ortripeptidase		PepD2
AUO97_RS00285
AUO97_RS00290	COG0287	E	Prephenatedehydrogenase	Aromaticaminoacidbiosynthesis	TyrA
AUO97_RS00295	COG1605	E	Chorismatemutase	Aromaticaminoacidbiosynthesis	PheA
AUO97_RS00300	COG2819	R	Predictedhydrolaseofthealpha/betasuperfamily		YbbA
AUO97_RS00305	COG1960	I	Acyl-CoAdehydrogenaserelatedtothealkylationresponseproteinAidB	Fattyacidbiosynthesis	CaiA
AUO97_RS00310	COG1301	C	Na+/H+-dicarboxylatesymporter		GltP
AUO97_RS00320	COG0547	E	Anthranilatephosphoribosyltransferase,glycosyltransferasedomain	Aromaticaminoacidbiosynthesis	TrpD
AUO97_RS00325	COG3139	S	UncharacterizedconservedproteinYeaC,DUF1315family		yeaC
AUO97_RS00330	COG0061	H	NADkinase		NadK
AUO97_RS00335	COG0744	M	Penicillin-bindingprotein1B/1F,peptidoglycantransglycosylase/transpeptidase		MrcB
AUO97_RS00340
AUO97_RS00345	COG1051	F	ADP-ribosepyrophosphataseYjhB,NUDIXfamily		YjhB
AUO97_RS00350	COG4256	H	HeminuptakeproteinHemP		HemP
AUO97_RS00355	COG0642	T	Signaltransductionhistidinekinase		BaeS
AUO97_RS00355	COG0642	T	Signaltransductionhistidinekinase		BaeS
AUO97_RS00360	COG0745	T	DNA-bindingresponseregulator,OmpRfamily,containsRECandwinged-helix(wHTH)domain		OmpR
AUO97_RS00365	COG3111	S	PredictedperiplasmicproteinYdeIwithOB-fold,BOFfamily		YdeI
AUO97_RS00370	COG2804	N	TypeIIsecretorypathwayATPaseGspE/PulEorT4PpilusassemblypathwayATPasePilB		PulE
AUO97_RS00375	COG3174	P	MembranecomponentofpredictedMg2+transportsystem,containsDUF4010domain		MgtC
AUO97_RS00380	COG1720	J	tRNA(Thr-GGU)A37N6-methylase	tRNAmodification	TrmO
AUO97_RS00385	COG1018	C	Flavodoxin/ferredoxin--NADPreductase		Fpr
AUO97_RS00390	COG0384	R	PredictedepimeraseYddE/YHI9,PhzFsuperfamily		YHI9
AUO97_RS00395	COG1167	K	DNA-bindingtranscriptionalregulator,MocRfamily,containsanaminotransferasedomain	Lysinebiosynthesis	ARO8
AUO97_RS00400	COG0826	J	23SrRNAC2501andtRNAU345'-hydroxylationproteinRlhA/YrrN/YrrO,U32peptidasefamily	23SrRNAmodification	RlhA
AUO97_RS00405	COG1143	C	Formatehydrogenlyasesubunit6/NADH:ubiquinoneoxidoreductase23kDsubunit(chainI)	NADHdehydrogenase	NuoI
AUO97_RS00410	COG2076	V	MultidrugtransporterEmrEandrelatedcationtransporters		EmrE
AUO97_RS00415	COG4598	E	ABC-typehistidinetransportsystem,ATPasecomponent		HisP
AUO97_RS00415	COG4598	E	ABC-typehistidinetransportsystem,ATPasecomponent		HisP
AUO97_RS00420	COG4160	E	ABC-typearginine/histidinetransportsystem,permeasecomponent		ArtM
AUO97_RS00425	COG4215	E	ABC-typeargininetransportsystem,permeasecomponent		ArtQ
AUO97_RS00430	COG0834	E	ABC-typeaminoacidtransport/signaltransductionsystem,periplasmiccomponent/domain		HisJ
AUO97_RS00435	COG0583	K	DNA-bindingtranscriptionalregulator,LysRfamily		LysR
AUO97_RS00440	COG0845	M	MultidrugeffluxpumpsubunitAcrA(membrane-fusionprotein)		AcrA
AUO97_RS00445	COG0841	V	MultidrugeffluxpumpsubunitAcrB		AcrB
AUO97_RS00450	COG1538	M	OutermembraneproteinTolC		TolC
AUO97_RS00455	COG0112	E	Glycine/serinehydroxymethyltransferase	Serinebiosynthesis	GlyA
AUO97_RS00460	COG1506	E	Dipeptidylaminopeptidase/acylaminoacylpeptidase		DAP2
AUO97_RS00465	COG0847	L	DNApolymeraseIII,epsilonsubunitorrelated3'-5'exonuclease		DnaQ
AUO97_RS00470
AUO97_RS00480	COG1131	V	ABC-typemultidrugtransportsystem,ATPasecomponent		CcmA
AUO97_RS00485	COG0842	V	ABC-typemultidrugtransportsystem,permeasecomponent		YadH
AUO97_RS00490	COG2904	J	NADPH-dependent7-cyano-7-deazaguaninereductaseQueF,N-terminaldomain		QueFN
AUO97_RS00495
AUO97_RS00500	COG0772	D	PeptodoglycanpolymeraseFtsW/RodA/SpoVE		FtsW
AUO97_RS00505	COG2951	M	Membrane-boundlyticmureintransglycosylaseB		MltB
AUO97_RS00510	COG0797	M	PeptidoglycanlytictransglycosylaseRlpA,containsC-terminalSPORdomain		RlpA
AUO97_RS00520	COG4392	E	Branched-chainaminoacidtransportprotein		AzlD2
AUO97_RS00525	COG1296	E	Predictedbranched-chainaminoacidpermease(azaleucineresistance)		AzlC
AUO97_RS00525	COG1296	E	Predictedbranched-chainaminoacidpermease(azaleucineresistance)		AzlC
AUO97_RS00530	COG2207	K	AraC-typeDNA-bindingdomainandAraC-containingproteins		AraC
AUO97_RS00535
AUO97_RS00540	COG0264	J	TranslationelongationfactorEF-Ts	Translationfactors	Tsf
AUO97_RS00545	COG0052	J	RibosomalproteinS2	Ribosome30Ssubunit	RpsB
AUO97_RS00550	COG0024	J	Methionineaminopeptidase		Map
AUO97_RS00555	COG3047	M	OutermembraneproteinOmpW		OmpW
AUO97_RS00560	COG2223	P	Nitrate/nitritetransporterNarK		NarK
AUO97_RS00565	COG2223	P	Nitrate/nitritetransporterNarK		NarK
AUO97_RS00570	COG1249	C	Dihydrolipoamidedehydrogenase(E3)componentofpyruvate/2-oxoglutaratedehydrogenasecomplexorglutathioneoxidoreductase	GlycinecleavagePyruvateoxidation	Lpd
AUO97_RS00575	COG0320	H	Lipoatesynthase	Lipoatebiosynthesis	LipA
AUO97_RS00580	COG1960	I	Acyl-CoAdehydrogenaserelatedtothealkylationresponseproteinAidB	Fattyacidbiosynthesis	CaiA
AUO97_RS00585	COG0599	R	UncharacterizedconservedproteinYurZ,alkylhydroperoxidase/carboxymuconolactonedecarboxylasefamily		YurZ
AUO97_RS00585	COG0599	R	UncharacterizedconservedproteinYurZ,alkylhydroperoxidase/carboxymuconolactonedecarboxylasefamily		YurZ
AUO97_RS00595	COG0499	H	S-adenosylhomocysteinehydrolase		SAM1
AUO97_RS00600	COG0685	E	5,10-methylenetetrahydrofolatereductase		MetF
AUO97_RS00605	COG1385	J	16SrRNAU1498N3-methylaseRsmE	16SrRNAmodification	RsmE
AUO97_RS00610	COG5001	T	Cyclicdi-GMPmetabolismprotein,combinesGGDEFandEALdomainswitha6TMmembranedomain
AUO97_RS00615	COG0281	C	Malicenzyme	Ureacycle	SfcA
AUO97_RS00620	COG0617	J	tRNAnucleotidyltransferase/poly(A)polymerase	tRNAmodification	PcnB
AUO97_RS00625	COG0265	O	Periplasmicserineprotease,S1-Csubfamily,containC-terminalPDZdomain		DegQ
AUO97_RS00630	COG0327	H	PutativeGTPcyclohydrolase1type2,NIF3family	Folatebiosynthesis	NIF3
AUO97_RS00635	COG0605	P	Superoxidedismutase		SodA
AUO97_RS00655	COG2852	L	Very-short-patch-repairendonuclease		YcjD
AUO97_RS00655	COG2852	L	Very-short-patch-repairendonuclease		YcjD
AUO97_RS00660
AUO97_RS00665	COG1506	E	Dipeptidylaminopeptidase/acylaminoacylpeptidase		DAP2
AUO97_RS00670	COG0382	H	4-hydroxybenzoatepolyprenyltransferase	Ubiquinonebiosynthesis	UbiA
AUO97_RS00675	COG3161	H	4-hydroxybenzoatesynthetase(chorismate-pyruvatelyase)	Ubiquinonebiosynthesis	UbiC
AUO97_RS00680	COG0174	E	Glutaminesynthetase	Glutaminebiosynthesis	GlnA
AUO97_RS00685	COG3104	E	Dipeptide/tripeptidepermease		PTR2
AUO97_RS00690	COG0006	E	Xaa-Proaminopeptidase		PepP
AUO97_RS00695	COG0512	E	Anthranilate/para-aminobenzoatesynthasecomponentII(glutamineamidotransferase)	Aromaticaminoacidbiosynthesis	PabA
AUO97_RS00700	COG0308	E	AminopeptidaseN,containsDUF3458domain		PepN
AUO97_RS00705	COG4771	P	Outermembranereceptorforferrienterochelinandcolicins		FepA
AUO97_RS00705	COG4771	P	Outermembranereceptorforferrienterochelinandcolicins		FepA
AUO97_RS00710	COG0547	E	Anthranilatephosphoribosyltransferase,glycosyltransferasedomain	Aromaticaminoacidbiosynthesis	TrpD
AUO97_RS00715	COG0134	E	Indole-3-glycerolphosphatesynthase	Aromaticaminoacidbiosynthesis	TrpC
AUO97_RS00720	COG2840	L	DNA-nickingendonuclease,Smrdomain		SmrA
AUO97_RS00725	COG1975	O	MolybdoenzymematurationfactorPaoD(Mocofactorinsertion),XdhC/CoxFfamily		XdhC
AUO97_RS00730	COG4631	F	Xanthinedehydrogenase,molybdopterin-bindingsubunitXdhB		XdhB
AUO97_RS00735	COG4630	F	Xanthinedehydrogenase,Fe-SclusterandFAD-bindingsubunitXdhA		XdhA
AUO97_RS00740	COG0302	H	GTPcyclohydrolaseI	Folatebiosynthesis	FolE
AUO97_RS00745	COG1680	V	CubicOgrouppeptidase,beta-lactamaseclassCfamily		AmpC
AUO97_RS00750
AUO97_RS00760	COG3739	S	UncharacterizedmembraneproteinYoaT,DUF817family		YoaT
AUO97_RS00765	COG0407	H	Uroporphyrinogen-IIIdecarboxylaseHemE	Hemebiosynthesis	HemE
AUO97_RS00770	COG1376	M	Lipoprotein-anchoringtranspeptidaseErfK/SrfK		ErfK
AUO97_RS00775	COG1169	H	IsochorismatesynthaseEntC	Menaquinonebiosynthesis	MenF
AUO97_RS00780	COG2977	Q	4'-phosphopantetheinyltransferaseEntD(siderophorebiosynthesis)		EntD
AUO97_RS00785	COG3208	Q	Surfactinsynthasethioesterasesubunit		GrsT
AUO97_RS00790	COG1132	V	ABC-typemultidrugtransportsystem,ATPaseandpermeasecomponent		MdlB
AUO97_RS00795	COG1132	V	ABC-typemultidrugtransportsystem,ATPaseandpermeasecomponent		MdlB
AUO97_RS00800	COG0076	E	GlutamateortyrosinedecarboxylaseorarelatedPLP-dependentprotein	Pantothenate/CoAbiosynthesis	GadA
AUO97_RS00805	COG3433	I	Acylcarrierprotein/domain		AcpA
AUO97_RS00805	COG3433	I	Acylcarrierprotein/domain		AcpA
AUO97_RS00810	COG1021	Q	EntE,2,3-dihydroxybenzoate-AMPsynthasecomponentofnon-ribosomalpeptidesynthetase		EntE
AUO97_RS00815	COG1020	Q	EntF,seryl-AMPsynthasecomponentofnon-ribosomalpeptidesynthetase		EntF
AUO97_RS00820	COG3486	Q	Lysine/ornithineN-monooxygenase		IucD
AUO97_RS00825	COG4774	P	Outermembranereceptorformonomericcatechols		Fiu
AUO97_RS00830	COG4607	P	ABC-typeenterochelintransportsystem,periplasmiccomponent		CeuA
AUO97_RS00835	COG4604	P	ABC-typeenterochelintransportsystem,ATPasecomponent		CeuD
AUO97_RS00840	COG4605	P	ABC-typeenterochelintransportsystem,permeasecomponent		CeuC
AUO97_RS00845	COG4606	P	ABC-typeenterochelintransportsystem,permeasecomponent		CeuB
AUO97_RS00850	COG1020	Q	EntF,seryl-AMPsynthasecomponentofnon-ribosomalpeptidesynthetase		EntF
AUO97_RS00855	COG0318	I	O-succinylbenzoicacid-CoAligaseMenEorrelatedacyl-CoAsynthetase(AMP-forming)	Menaquinonebiosynthesis	MenE/FadK
AUO97_RS00860	COG2375	P	NADPH-dependentferricsiderophorereductase,containsFAD-bindingandSIPdomains		ViuB
AUO97_RS00865	COG2964	K	PredictedtranscriptionalregulatorYheO,containsPASandDNA-bindingHTHdomains		YheO
AUO97_RS00870	COG1171	E	Threoninedeaminase	Isoleucine,leucine,valinebiosynthesis	IlvA
AUO97_RS00875	COG1741	R	Redox-sensitivebicupinYhaK,pirinsuperfamily		YhaK
AUO97_RS00880	COG1309	K	DNA-bindingprotein,AcrRfamily,includesnucleoidocclusionproteinSlmA		AcrR
AUO97_RS00890
AUO97_RS00895
AUO97_RS00900	COG0303	H	MolybdopterinMo-transferase(molybdopterinbiosynthesis)	Molybdopterinbiosynthesis	MoeA
AUO97_RS00940	COG0583	K	DNA-bindingtranscriptionalregulator,LysRfamily		LysR
AUO97_RS00985	COG2879	S	UncharacterizedshortproteinYbdD,DUF466family		YbdD
AUO97_RS00990	COG1966	C	CarbonstarvationproteinCstA(peptide/pyruvatetransporter)		CstA
AUO97_RS00995	COG0231	J	TranslationelongationfactorP(EF-P)/translationinitiationfactor5A(eIF-5A)	Translationfactors	Efp
AUO97_RS01000	COG1509	E	L-lysine2,3-aminomutase(EF-Pbeta-lysylationpathway)		EpmB
AUO97_RS01010	COG2200	T	EALdomain,c-di-GMP-specificphosphodiesteraseclassI(oritsenzymaticallyinactivevariant)		EAL
AUO97_RS01015	COG0254	J	RibosomalproteinL31	Ribosome50Ssubunit	RpmE
AUO97_RS01020	COG0385	R	PredictedNa+-dependenttransporterYfeH		YfeH
AUO97_RS01025	COG0346	Q	Catechol2,3-dioxygenaseorrelatedenzyme,vicinaloxygenchelate(VOC)family		GloA
AUO97_RS01030
AUO97_RS01035	COG1067	O	PredictedATP-dependentprotease		LonB
AUO97_RS01040	COG0583	K	DNA-bindingtranscriptionalregulator,LysRfamily		LysR
AUO97_RS01045	COG0739	M	MureinDD-endopeptidaseMepMandmureinhydrolaseactivatorNlpD,containsLysMdomain		NlpD
AUO97_RS01050	COG0496	L	Broadspecificitypolyphosphataseand5'/3'-nucleotidaseSurE		SurE
AUO97_RS01055
AUO97_RS01060
AUO97_RS01065	COG1686	M	D-alanyl-D-alaninecarboxypeptidase		DacC
AUO97_RS01070	COG0663	R	Carbonicanhydraseoracetyltransferase,isoleucinepatchsuperfamily		PaaY
AUO97_RS01075	COG1051	F	ADP-ribosepyrophosphataseYjhB,NUDIXfamily		YjhB
AUO97_RS01080	COG0482	J	tRNAU342-thiouridinesynthaseMnmA/TrmU,containsthePP-loopATPasedomain	tRNAmodification	MnmA
AUO97_RS01085	COG2915	X	RegulatorofphagelambdalysogenizationHflD,bindstoCIIandstimulatesitsdegradation		HflD
AUO97_RS01090	COG0015	F	Adenylosuccinatelyase	Purinebiosynthesis	PurB
AUO97_RS01095	COG3647	S	UncharacterizedmembraneproteinYjdF		YjdF
AUO97_RS01100
AUO97_RS01100
AUO97_RS01100
AUO97_RS01100
AUO97_RS01100
AUO97_RS01100
AUO97_RS01105	COG0616	O	Periplasmicserineprotease,ClpPclass		SppA
AUO97_RS01110	COG1117	P	ABC-typephosphatetransportsystem,ATPasecomponent		PstB
AUO97_RS01110	COG1117	P	ABC-typephosphatetransportsystem,ATPasecomponent		PstB
AUO97_RS01115	COG0581	P	ABC-typephosphatetransportsystem,permeasecomponent		PstA
AUO97_RS01120	COG0573	P	ABC-typephosphatetransportsystem,permeasecomponent		PstC
AUO97_RS01125	COG0226	P	ABC-typephosphatetransportsystem,periplasmiccomponent		PstS
AUO97_RS01130	COG1113	E	L-asparaginetransporterorrelatedpermease		AnsP
AUO97_RS01135	COG3961	G	TPP-dependent2-oxoaciddecarboxylase,includesindolepyruvatedecarboxylase	Pyruvateoxidation	PDC1
AUO97_RS01140	COG1522	K	DNA-bindingtranscriptionalregulator,Lrpfamily		Lrp
AUO97_RS01145	COG1012	I	Acyl-CoAreductaseorotherNAD-dependentaldehydedehydrogenase	Prolinedegradation	AdhE
AUO97_RS01150	COG0076	E	GlutamateortyrosinedecarboxylaseorarelatedPLP-dependentprotein	Pantothenate/CoAbiosynthesis	GadA
AUO97_RS01155	COG0160	E	Acetylornithineaminotransferase/4-aminobutyrateaminotransferase	Argininebiosynthesis	ArgD
AUO97_RS01160	COG3471	S	Predictedsecreted(periplasmic)protein
AUO97_RS01165	COG0583	K	DNA-bindingtranscriptionalregulator,LysRfamily		LysR
AUO97_RS01170	COG2249	R	PutativeNADPH-quinonereductase(modulatorofdrugactivityB)		MdaB
AUO97_RS01175	COG3239	I	Fattyaciddesaturase		DesA
AUO97_RS01180	COG1018	C	Flavodoxin/ferredoxin--NADPreductase		Fpr
AUO97_RS01185	COG1309	K	DNA-bindingprotein,AcrRfamily,includesnucleoidocclusionproteinSlmA		AcrR
AUO97_RS01190	COG0628	R	PredictedPurR-regulatedpermeasePerM		PerM
AUO97_RS01195	COG0553	K	SuperfamilyIIDNAorRNAhelicase,SNF2family		HepA
AUO97_RS01200	COG0564	J	PseudouridinesynthaseRluA,23SrRNA-ortRNA-specific	23SrRNAmodification	RluA
AUO97_RS01200	COG0564	J	PseudouridinesynthaseRluA,23SrRNA-ortRNA-specific	23SrRNAmodification	RluA
AUO97_RS01205	COG3433	I	Acylcarrierprotein/domain		AcpA
AUO97_RS01210	COG0001	H	Glutamate-1-semialdehydeaminotransferase	Hemebiosynthesis	HemL
AUO97_RS01215	COG0352	H	Thiaminemonophosphatesynthase	Thiaminebiosynthesis	ThiE
AUO97_RS01220	COG4323	S	Uncharacterizedconservedprotein,DUF962domain
AUO97_RS01225	COG3025	P	InorganictriphosphataseYgiF,containsCYTHandCHADdomains		PPPi
AUO97_RS01230
AUO97_RS01235
AUO97_RS01240	COG0612	R	PredictedZn-dependentpeptidase,M16family		PqqL
AUO97_RS01240	COG0612	R	PredictedZn-dependentpeptidase,M16family		PqqL
AUO97_RS01245	COG0384	R	PredictedepimeraseYddE/YHI9,PhzFsuperfamily		YHI9
AUO97_RS01250	COG1823	E	L-cystinetransporterTcyP,sodium:dicarboxylatesymporterfamily		TcyP
AUO97_RS01255	COG0583	K	DNA-bindingtranscriptionalregulator,LysRfamily		LysR
AUO97_RS01260	COG2814	G	PredictedarabinoseeffluxpermeaseAraJ,MFSfamily		AraJ
AUO97_RS01265
AUO97_RS01270
AUO97_RS01275	COG0538	C	Isocitratedehydrogenase	TCAcycle	Icd
AUO97_RS01280	COG1187	J	PseudouridylatesynthaseRsuA,specificfor16SrRNAU516and23SrRNAU2605	16SrRNAmodification	RsuA
AUO97_RS01285	COG2838	C	Monomericisocitratedehydrogenase	TCAcycle	IcdM
AUO97_RS01290	COG3975	R	Predictedmetalloprotease,containsC-terminalPDZdomain
AUO97_RS01295	COG1686	M	D-alanyl-D-alaninecarboxypeptidase		DacC
AUO97_RS01300	COG1252	C	NADHdehydrogenase,FAD-containingsubunit		Ndh
AUO97_RS01305	COG1047	O	Peptidyl-prolylcis-transisomerase,FKBPtype		SlpA
AUO97_RS01310	COG0415	L	Deoxyribodipyrimidinephotolyase		PhrB
AUO97_RS01315
AUO97_RS01320
AUO97_RS01325	COG1215	N	Glycosyltransferase,catalyticsubunitofcellulosesynthaseandpoly-beta-1,6-N-acetylglucosaminesynthase		BcsA
AUO97_RS01330
AUO97_RS01335
AUO97_RS01345	COG4783	M	Outermembraneproteinchaperone/metalloproteaseBepA/YfgC,containsM48andTPRdomains		BepA
AUO97_RS01350	COG1814	P	PredictedFe2+/Mn2+transporter,VIT1/CCC1family		Ccc1
AUO97_RS01355	COG2070	R	NAD(P)H-dependentflavinoxidoreductaseYrpB,nitropropanedioxygenasefamily		YrpB
AUO97_RS01355	COG2070	R	NAD(P)H-dependentflavinoxidoreductaseYrpB,nitropropanedioxygenasefamily		YrpB
AUO97_RS01360	COG0042	J	tRNA-dihydrouridinesynthase	tRNAmodification	DusA
AUO97_RS01365
AUO97_RS01370	COG0560	E	Phosphoserinephosphatase	Serinebiosynthesis	SerB
AUO97_RS01375	COG0263	E	Glutamate5-kinase	Prolinebiosynthesis	ProB
AUO97_RS01380	COG0536	D	GTPaseinvolvedincellpartioningandDNArepair		Obg
AUO97_RS01380	COG0536	D	GTPaseinvolvedincellpartioningandDNArepair		Obg
AUO97_RS01385
AUO97_RS01390
AUO97_RS01395	COG0057	G	Glyceraldehyde-3-phosphatedehydrogenase/erythrose-4-phosphatedehydrogenase	Glycolysis	GapA
AUO97_RS01400	COG2962	R	MembraneproteinRarD,containstwoEamAdomains,drug/metabolitetransporterfamily		RarD
AUO97_RS01405	COG3040	M	BacteriallipocalinBlc		Blc
AUO97_RS01405	COG3040	M	BacteriallipocalinBlc		Blc
AUO97_RS01410	COG0556	L	ExcinucleaseUvrABChelicasesubunitUvrB		UvrB
AUO97_RS01410	COG0556	L	ExcinucleaseUvrABChelicasesubunitUvrB		UvrB
AUO97_RS01415
AUO97_RS01420	COG2199	T	GGDEFdomain,diguanylatecyclase(c-di-GMPsynthetase)oritsenzymaticallyinactivevariants		GGDEF
AUO97_RS01425
AUO97_RS01430	COG0436	E	Aspartate/methionine/tyrosineaminotransferase	Isoleucine,leucine,valinebiosynthesis	AspB
AUO97_RS01435
AUO97_RS01440	COG0443	O	MolecularchaperoneDnaK(HSP70)		DnaK
AUO97_RS01450	COG2050	Q	Acyl-CoAthioesterasePaaI,containsHGGmotif		PaaI
AUO97_RS01450	COG2050	Q	Acyl-CoAthioesterasePaaI,containsHGGmotif		PaaI
AUO97_RS01455
AUO97_RS01465	COG4221	C	NADP-dependent3-hydroxyaciddehydrogenaseYdfG	Pyrimidinedegradation	YdfG
AUO97_RS01470	COG4445	J	tRNAisopentenyl-2-thiomethyl-A-37hydroxylaseMiaE(synthesisof2-methylthio-cis-ribozeatin)	tRNAmodification	MiaE
AUO97_RS01475	COG0854	H	Pyridoxine5'-phosphatesynthasePdxJ	Pyridoxalphosphatebiosynthesis	PdxJ
AUO97_RS01480	COG1381	L	RecombinationalDNArepairproteinRecO(RecFpathway)		RecO
AUO97_RS01485
AUO97_RS01490	COG1159	J	GTPaseEra,involvedin16SrRNAprocessing		Era
AUO97_RS01495	COG0571	K	dsRNA-specificribonuclease		Rnc
AUO97_RS01500
AUO97_RS01505	COG0681	U	SignalpeptidaseI		LepB
AUO97_RS01510	COG0481	J	TranslationelongationfactorEF-4,membrane-boundGTPase		LepA
AUO97_RS01510	COG0481	J	TranslationelongationfactorEF-4,membrane-boundGTPase		LepA
AUO97_RS01520	COG0824	I	Acyl-CoAthioesteraseFadM	Menaquinonebiosynthesis	FadM
AUO97_RS01525	COG0265	O	Periplasmicserineprotease,S1-Csubfamily,containC-terminalPDZdomain		DegQ
AUO97_RS01530	COG0029	H	Aspartateoxidase	NADbiosynthesis	NadB
AUO97_RS01530	COG0029	H	Aspartateoxidase	NADbiosynthesis	NadB
AUO97_RS01535	COG2050	Q	Acyl-CoAthioesterasePaaI,containsHGGmotif		PaaI
AUO97_RS01540	COG0125	F	Thymidylatekinase	Thymidylatebiosynthesis	Tmk
AUO97_RS01545	COG1559	M	EndolytictransglycosylaseMltG,terminatespeptidoglycanpolymerization		MltG
AUO97_RS01550	COG0115	E	Branched-chainaminoacidaminotransferase/4-amino-4-deoxychorismatelyase	Isoleucine,leucine,valinebiosynthesis	IlvE
AUO97_RS01555	COG1613	P	ABC-typesulfatetransportsystem,periplasmiccomponent		Sbp
AUO97_RS01560	COG3545	R	Predictedesteraseofthealpha/betahydrolasefold		YdeN
AUO97_RS01565	COG0555	P	ABC-typesulfatetransportsystem,permeasecomponent		CysU
AUO97_RS01565	COG0555	P	ABC-typesulfatetransportsystem,permeasecomponent		CysU
AUO97_RS01570	COG4208	P	ABC-typesulfatetransportsystem,permeasecomponent		CysW
AUO97_RS01575	COG1118	P	ABC-typesulfate/molybdatetransportsystems,ATPasecomponent		CysA
AUO97_RS01575	COG1118	P	ABC-typesulfate/molybdatetransportsystems,ATPasecomponent		CysA
AUO97_RS01580	COG0583	K	DNA-bindingtranscriptionalregulator,LysRfamily		LysR
AUO97_RS01585
AUO97_RS01590	COG2171	E	TetrahydrodipicolinateN-succinyltransferase	Lysinebiosynthesis	DapD
AUO97_RS01595	COG0602	H	OrganicradicalactivatingenzymeNrdG/QueE	tRNAmodification	QueE
AUO97_RS01600	COG0603	J	7-cyano-7-deazaguaninesynthase(queuosinebiosynthesis)	tRNAmodification	QueC
AUO97_RS01600	COG0603	J	7-cyano-7-deazaguaninesynthase(queuosinebiosynthesis)	tRNAmodification	QueC
AUO97_RS01605
AUO97_RS01610	COG2102	J	Diphthamidesynthase(EF-2-diphthine--ammonialigase)		Dph6
AUO97_RS01615	COG1225	O	Peroxiredoxin		Bcp
AUO97_RS01620	COG2340	D	SporegerminationproteinYkwDandrelatedproteinswithCAP(CSP/antigen5/PR1)domain		YkwD
AUO97_RS01625	COG1056	H	Nicotinamidemononucleotideadenylyltransferase	NADbiosynthesis	NadR
AUO97_RS01630	COG1024	I	Enoyl-CoAhydratase/carnithineracemase	Fattyacidbiosynthesis	CaiD
AUO97_RS01630	COG1024	I	Enoyl-CoAhydratase/carnithineracemase	Fattyacidbiosynthesis	CaiD
AUO97_RS01635	COG3323	S	PII-likeinsertintheuncharacterizedproteinYqfO,YbgI/NIF3family		YqfO
AUO97_RS01780	COG1020	Q	EntF,seryl-AMPsynthasecomponentofnon-ribosomalpeptidesynthetase		EntF
AUO97_RS01795	COG1028	I	NAD(P)-dependentdehydrogenase,short-chainalcoholdehydrogenasefamily	Fattyacidbiosynthesis	FabG
AUO97_RS01830
AUO97_RS01835	COG0047	F	Phosphoribosylformylglycinamidine(FGAM)synthase,glutamineamidotransferasedomain	Purinebiosynthesis	PurL2
AUO97_RS01840	COG0232	F	dGTPtriphosphohydrolase		Dgt
AUO97_RS01845	COG0632	L	HollidayjunctionresolvasomeRuvABCDNA-bindingsubunit		RuvA
AUO97_RS01850	COG2255	L	HollidayjunctionresolvasomeRuvABC,ATP-dependentDNAhelicasesubunitRuvB		RuvB
AUO97_RS01855	COG1473	R	Metal-dependentamidase/aminoacylase/carboxypeptidase	Lysinebiosynthesis	AbgB
AUO97_RS01860	COG0824	I	Acyl-CoAthioesteraseFadM	Menaquinonebiosynthesis	FadM
AUO97_RS01865	COG0811	U	BiopolymertransportproteinExbB/TolQ		TolQ
AUO97_RS01870	COG0848	U	BiopolymertransportproteinExbD		ExbD
AUO97_RS01875	COG3064	M	MembraneproteinTolAinvolvedincolicinuptake		TolA
AUO97_RS01880	COG0823	U	PeriplasmiccomponentTolBoftheTolbiopolymertransportsystem		TolB
AUO97_RS01885	COG2885	M	OutermembraneproteinOmpAandrelatedpeptidoglycan-associated(lipo)proteins		OmpA
AUO97_RS01890
AUO97_RS01895	COG0158	G	Fructose-1,6-bisphosphatase	Gluconeogenesis	Fbp
AUO97_RS01900	COG0566	J	tRNAG18(ribose-2'-O)-methylaseSpoU	tRNAmodification	SpoU
AUO97_RS01905	COG1595	K	DNA-directedRNApolymerasespecializedsigmasubunit,sigma24family	RNApolymerase	RpoE
AUO97_RS01910
AUO97_RS01915
AUO97_RS01920
AUO97_RS01925
AUO97_RS01930	COG0593	L	ChromosomalreplicationinitiationATPaseDnaA		DnaA
AUO97_RS01935	COG0628	R	PredictedPurR-regulatedpermeasePerM		PerM
AUO97_RS01940	COG0150	F	Phosphoribosylaminoimidazole(AIR)synthetase	Purinebiosynthesis	PurM
AUO97_RS01945	COG0299	F	Folate-dependentphosphoribosylglycinamideformyltransferasePurN	Purinebiosynthesis	PurN
AUO97_RS01950	COG0596	H	2-succinyl-6-hydroxy-2,4-cyclohexadiene-1-carboxylatesynthaseMenHandrelatedesterases,alpha/betahydrolasefold	Menaquinonebiosynthesis	MenH
AUO97_RS01950	COG0596	H	2-succinyl-6-hydroxy-2,4-cyclohexadiene-1-carboxylatesynthaseMenHandrelatedesterases,alpha/betahydrolasefold	Menaquinonebiosynthesis	MenH
AUO97_RS01955	COG0616	O	Periplasmicserineprotease,ClpPclass		SppA
AUO97_RS01960	COG1560	I	Palmitoleoyl-ACP:Kdo2-lipid-IVacyltransferase(lipidAbiosynthesis)	LipidAbiosynthesis	LpxP
AUO97_RS01965	COG2333	U	DNAuptakechannelproteinComECC-terminaldomain,metallo-beta-lactamasesuperfamily		ComEC
AUO97_RS01970	COG1136	M	ABC-typelipoproteinexportsystem,ATPasecomponent		LolD
AUO97_RS01975	COG4591	M	ABC-typetransportsysteminvolvedinlipoproteinrelease,permeasecomponentLolC		LolE
AUO97_RS01980	COG0697	G	Permeaseofthedrug/metabolitetransporter(DMT)superfamily		RhaT
AUO97_RS01985	COG1671	S	UncharacterizedconservedproteinYaiI,UPF0178family		YaiI
AUO97_RS01990
AUO97_RS01995	COG1932	H	Phosphoserineaminotransferase	Serinebiosynthesis	SerC
AUO97_RS02000	COG1538	M	OutermembraneproteinTolC		TolC
AUO97_RS02005	COG1566	V	MultidrugresistanceeffluxpumpEmrA		EmrA
AUO97_RS02010
AUO97_RS02015	COG0842	V	ABC-typemultidrugtransportsystem,permeasecomponent		YadH
AUO97_RS02020	COG3394	G	ChitooligosaccharidedeacetylaseChbG,YdjC/CelGfamily		ChbG
AUO97_RS02025	COG0463	M	Glycosyltransferaseinvolvedincellwallbisynthesis		WcaA
AUO97_RS02030
AUO97_RS02035	COG1807	M	PMTfamilyglycosyltransferaseArnT/Agl22,involvedinglycosylationofproteinsandlipidIVA		ArnT
AUO97_RS02040	COG0188	L	DNAgyrase/topoisomeraseIV,subunitA		GyrA
AUO97_RS02045	COG2025	C	Electrontransferflavoprotein,alphasubunitFixB		FixB
AUO97_RS02050	COG2086	C	Electrontransferflavoprotein,alphaandbetasubunits		FixA
AUO97_RS02055	COG4974	L	Site-specificrecombinaseXerD		XerD
AUO97_RS02060	COG1280	E	Threonine/homoserine/homoserinelactoneeffluxprotein		RhtB
AUO97_RS02065	COG0253	E	Diaminopimelateepimerase	Lysinebiosynthesis	DapF
AUO97_RS02070	COG0019	E	Diaminopimelatedecarboxylase	Lysinebiosynthesis	LysA
AUO97_RS02075
AUO97_RS02080	COG1113	E	L-asparaginetransporterorrelatedpermease		AnsP
AUO97_RS02085	COG1066	L	DNArepairproteinRadA/Sms,containsAAA+ATPasedomain		Sms
AUO97_RS02090	COG4395	I	Predictedlipid-bindingtransportprotein,Tim44family		Tim44
AUO97_RS02095	COG2269	J	ElongationfactorP--beta-lysineligase(EF-Pbeta-lysylationpathway)		EpmA
AUO97_RS02100	COG0111	H	Phosphoglyceratedehydrogenaseorrelateddehydrogenase	Serinebiosynthesis	SerA
AUO97_RS02100	COG0111	H	Phosphoglyceratedehydrogenaseorrelateddehydrogenase	Serinebiosynthesis	SerA
AUO97_RS02105	COG3339	S	UncharacterizedmembraneproteinYkvA,DUF1232family		YkvA
AUO97_RS02110	COG1526	C	FormatedehydrogenaseassemblyfactorFdhD,asulfurtransferase		FdhD
AUO97_RS02115	COG0243	C	Anaerobicselenocysteine-containingdehydrogenase		BisC
AUO97_RS02120	COG1929	G	Glyceratekinase	Non-phosphorylatedEntner-Doudoroffpathway	GlxK
AUO97_RS02125	COG1309	K	DNA-bindingprotein,AcrRfamily,includesnucleoidocclusionproteinSlmA		AcrR
AUO97_RS02130	COG0300	R	Short-chaindehydrogenase		YqjQ
AUO97_RS02135	COG0778	C	Nitroreductase	Pyrimidinedegradation	NfnB
AUO97_RS02150	COG1309	K	DNA-bindingprotein,AcrRfamily,includesnucleoidocclusionproteinSlmA		AcrR
AUO97_RS02150	COG1309	K	DNA-bindingprotein,AcrRfamily,includesnucleoidocclusionproteinSlmA		AcrR
AUO97_RS02205	COG0663	R	Carbonicanhydraseoracetyltransferase,isoleucinepatchsuperfamily		PaaY
AUO97_RS02210
AUO97_RS02220	COG0782	K	Transcriptionelongationfactor,GreA/GreBfamily		GreA
AUO97_RS02225	COG4623	M	Membrane-boundlyticmureintransglycosylaseMltF		MltF
AUO97_RS02230
AUO97_RS02235	COG0037	J	tRNA(Ile)-lysidinesynthaseTilS/MesJ	tRNAmodification	TilS
AUO97_RS02245	COG0741	M	Solublelyticmureintransglycosylaseorregulatoryproteins(maycontainLysM/invasindomain)		MltE
AUO97_RS02250	COG0501	O	Zn-dependentproteasewithchaperonefunction		HtpX
AUO97_RS02255
AUO97_RS02260	COG0841	V	MultidrugeffluxpumpsubunitAcrB		AcrB
AUO97_RS02265	COG0584	I	Glycerophosphoryldiesterphosphodiesterase		UgpQ
AUO97_RS02265	COG0584	I	Glycerophosphoryldiesterphosphodiesterase		UgpQ
AUO97_RS02270	COG0491	R	Glyoxylaseorarelatedmetal-dependenthydrolase,beta-lactamasesuperfamilyII		GloB
AUO97_RS02275	COG0818	I	Diacylglycerolkinase		DgkA
AUO97_RS02280	COG0459	O	ChaperoninGroEL(HSP60family)		GroEL
AUO97_RS02285	COG0234	O	Co-chaperoninGroES(HSP10)		GroES
AUO97_RS02290	COG1409	T	3',5'-cyclicAMPphosphodiesteraseCpdA		CpdA
AUO97_RS02295	COG1597	I	Phosphatidylglycerolkinase,diacylglycerolkinasefamily		LCB5
AUO97_RS02300	COG1274	C	Phosphoenolpyruvatecarboxykinase,GTP-dependent	Gluconeogenesis	PepCK
AUO97_RS02305	COG0578	C	Glycerol-3-phosphatedehydrogenase	Isoprenoidbiosynthesis	GlpA
AUO97_RS02310	COG0554	C	Glycerolkinase		GlpK
AUO97_RS02315	COG2814	G	PredictedarabinoseeffluxpermeaseAraJ,MFSfamily		AraJ
AUO97_RS02320
AUO97_RS02325	COG3897	O	ProteinN-terminalandlysineN-methylase,NNT1/EFM7family		Nnt1
AUO97_RS02330	COG0190	H	5,10-methylene-tetrahydrofolatedehydrogenase/Methenyltetrahydrofolatecyclohydrolase		FolD
AUO97_RS02345	COG3540	P	Phosphodiesterase/alkalinephosphataseD		PhoD
AUO97_RS02355
AUO97_RS02360
AUO97_RS02365	COG0294	H	Dihydropteroatesynthase	Folatebiosynthesis	FolP
AUO97_RS02370	COG0465	O	ATP-dependentZnproteases		HflB
AUO97_RS02375	COG0293	J	23SrRNAU2552(ribose-2'-O)-methylaseRlmE/FtsJ	23SrRNAmodification	RlmE
AUO97_RS02380	COG1534	J	RNA-bindingproteinYhbY		YhbY
AUO97_RS02385
AUO97_RS02390
AUO97_RS02390
AUO97_RS02400	COG0505	E	Carbamoylphosphatesynthasesmallsubunit	Argininebiosynthesis	CarA
AUO97_RS02405	COG0458	E	Carbamoylphosphatesynthaselargesubunit	Argininebiosynthesis	CarB
AUO97_RS02405	COG0458	E	Carbamoylphosphatesynthaselargesubunit	Argininebiosynthesis	CarB
AUO97_RS02410	COG0782	K	Transcriptionelongationfactor,GreA/GreBfamily		GreA
AUO97_RS02425	COG0110	R	Acetyltransferase,isoleucinepatchsuperfamily		WbbJ
AUO97_RS02430	COG0589	T	Nucleotide-bindinguniversalstressprotein,UspAfamily		UspA
AUO97_RS02435	COG3695	K	AlkylatedDNAnucleotideflippaseAtl1,participatesinnucleotideexcisionrepair,Ada-likeDNA-bindingdomain		Atl1
AUO97_RS02440
AUO97_RS02445	COG2843	M	Poly-gamma-glutamatebiosynthesisproteinCapA/YwtB(capsuleformation),metallophosphatasesuperfamily		CapA
AUO97_RS02450
AUO97_RS02455
AUO97_RS02455
AUO97_RS02455
AUO97_RS02455
AUO97_RS02455
AUO97_RS02455
AUO97_RS02455
AUO97_RS02455
AUO97_RS02455
AUO97_RS02455
AUO97_RS02455
AUO97_RS02455
AUO97_RS02460	COG0025	P	NhaP-typeNa+/H+orK+/H+antiporter		NhaP
AUO97_RS02460	COG0025	P	NhaP-typeNa+/H+orK+/H+antiporter		NhaP
AUO97_RS02465	COG2321	R	Predictedmetalloprotease		YpfJ
AUO97_RS02470	COG2354	L	MembraneproteinMutK/YedI,maybeinvolvedinDNArepair		MutK
AUO97_RS02475	COG0180	J	Tryptophanyl-tRNAsynthetase	Aminoacyl-tRNAsynthetases	TrpS
AUO97_RS02480	COG0074	C	Succinyl-CoAsynthetase,alphasubunit	TCAcycle	SucD
AUO97_RS02485	COG0045	C	Succinyl-CoAsynthetase,betasubunit	TCAcycle	SucC
AUO97_RS02490	COG1249	C	Dihydrolipoamidedehydrogenase(E3)componentofpyruvate/2-oxoglutaratedehydrogenasecomplexorglutathioneoxidoreductase	GlycinecleavagePyruvateoxidation	Lpd
AUO97_RS02490	COG1249	C	Dihydrolipoamidedehydrogenase(E3)componentofpyruvate/2-oxoglutaratedehydrogenasecomplexorglutathioneoxidoreductase	GlycinecleavagePyruvateoxidation	Lpd
AUO97_RS02495	COG0508	C	Pyruvate/2-oxoglutaratedehydrogenasecomplex,dihydrolipoamideacyltransferase(E2)component	Pyruvateoxidation	AceF
AUO97_RS02500	COG0567	C	2-oxoglutaratedehydrogenasecomplex,dehydrogenase(E1)component,andrelatedenzymes	TCAcycle	SucA
AUO97_RS02500	COG0567	C	2-oxoglutaratedehydrogenasecomplex,dehydrogenase(E1)component,andrelatedenzymes	TCAcycle	SucA
AUO97_RS02500	COG0567	C	2-oxoglutaratedehydrogenasecomplex,dehydrogenase(E1)component,andrelatedenzymes	TCAcycle	SucA
AUO97_RS02510	COG0479	C	Succinatedehydrogenase/fumaratereductase,Fe-Sproteinsubunit	TCAcycle	SdhB/FrdB
AUO97_RS02515	COG1053	C	Succinatedehydrogenase/fumaratereductase,flavoproteinsubunit	TCAcycle	SdhA
AUO97_RS02520	COG2142	C	Succinatedehydrogenase,hydrophobicanchorsubunit		SdhD
AUO97_RS02525	COG2009	C	Succinatedehydrogenase/fumaratereductase,cytochromebsubunit		SdhC
AUO97_RS02530	COG0372	C	Citratesynthase	TCAcycle	GltA
AUO97_RS02535	COG3313	R	PredictedFe-SproteinYdhL,DUF1289family		YdhL
AUO97_RS02540	COG1054	J	tRNAU345'-hydroxylaseTrhO,rhodanesefamily		TrhO
AUO97_RS02550
AUO97_RS02555
AUO97_RS02560	COG0568	K	DNA-directedRNApolymerase,sigmasubunit(sigma70/sigma32)	RNApolymerase	RpoD
AUO97_RS02565	COG2921	T	Putativelipoate-bindingregulatoryprotein,UPF0250family		YbeD
AUO97_RS02570	COG0321	H	Lipoate-proteinligaseB	Lipoatebiosynthesis	LipB
AUO97_RS02575
AUO97_RS02580	COG1454	C	Alcoholdehydrogenase,classIV		EutG
AUO97_RS02585	COG0531	E	SerinetransporterYbeC,aminoacid:H+symporterfamily		PotE
AUO97_RS02590	COG0655	C	MultimericflavodoxinWrbA,includesNAD(P)H:quinoneoxidoreductase		WrbA
AUO97_RS02595	COG1733	K	DNA-bindingtranscriptionalregulator,HxlRfamily		HxlR
AUO97_RS02600	COG0219	J	tRNA(Leu)C34orU34(ribose-2'-O)-methylaseTrmL,containsSPOUTdomain	tRNAmodification	TrmL
AUO97_RS02605	COG1648	H	Sirohemesynthase(precorrin-2oxidase/ferrochelatasedomain)	Hemebiosynthesis	CysG2
AUO97_RS02610	COG0172	J	Seryl-tRNAsynthetase	Aminoacyl-tRNAsynthetases	SerS
AUO97_RS02615
AUO97_RS02620	COG2834	M	Outermembranelipoprotein-sortingprotein		LolA
AUO97_RS02625	COG0211	J	RibosomalproteinL27	Ribosome50Ssubunit	RpmA
AUO97_RS02630	COG0261	J	RibosomalproteinL21	Ribosome50Ssubunit	RplU
AUO97_RS02635
AUO97_RS02640	COG0142	H	Geranylgeranylpyrophosphatesynthase	Isoprenoidbiosynthesis	IspA
AUO97_RS02645	COG4389	L	Site-specificrecombinase
AUO97_RS02650	COG0671	I	Membrane-associatedphospholipidphosphatase	Phospholipidbiosynthesis	PgpB
AUO97_RS02655	COG0845	M	MultidrugeffluxpumpsubunitAcrA(membrane-fusionprotein)		AcrA
AUO97_RS02660	COG0841	V	MultidrugeffluxpumpsubunitAcrB		AcrB
AUO97_RS02660	COG0841	V	MultidrugeffluxpumpsubunitAcrB		AcrB
AUO97_RS02665	COG1538	M	OutermembraneproteinTolC		TolC
AUO97_RS02670	COG0393	S	UncharacterizedpentamericproteinYbjQ,UPF0145family		YbjQ
AUO97_RS02675	COG0393	S	UncharacterizedpentamericproteinYbjQ,UPF0145family		YbjQ
AUO97_RS02680
AUO97_RS02685	COG0300	R	Short-chaindehydrogenase		YqjQ
AUO97_RS02690
AUO97_RS02695	COG0525	J	Valyl-tRNAsynthetase	Aminoacyl-tRNAsynthetases	ValS
AUO97_RS02700
AUO97_RS02705
AUO97_RS02710	COG0679	R	Predictedpermease,AEC(auxineffluxcarrier)family		YfdV
AUO97_RS02715	COG0583	K	DNA-bindingtranscriptionalregulator,LysRfamily		LysR
AUO97_RS02725	COG0004	P	AmmoniachannelproteinAmtB		AmtB
AUO97_RS02730	COG3907	R	Membrane-associatedenzyme,PAP2(acidphosphatase)superfamily
AUO97_RS02735	COG0642	T	Signaltransductionhistidinekinase		BaeS
AUO97_RS02740	COG0745	T	DNA-bindingresponseregulator,OmpRfamily,containsRECandwinged-helix(wHTH)domain		OmpR
AUO97_RS02745	COG2194	M	PhosphoethanolaminetransferaseforperiplasmicglucansOpgE,AlkPsuperfamily		OpgE
AUO97_RS02745	COG2194	M	PhosphoethanolaminetransferaseforperiplasmicglucansOpgE,AlkPsuperfamily		OpgE
AUO97_RS02750
AUO97_RS02755
AUO97_RS02760	COG0204	I	1-acyl-sn-glycerol-3-phosphateacyltransferase	Phospholipidbiosynthesis	PlsC
AUO97_RS02765	COG1752	R	Predictedacylesterase/phospholipaseRssA,containdpatatindomain		RssA
AUO97_RS02770	COG1585	O	Membraneproteinimplicatedinregulationofmembraneproteaseactivity		YbbJ
AUO97_RS02775	COG0330	O	RegulatorofproteaseactivityHflC,stomatin/prohibitinsuperfamily		HflC
AUO97_RS02780	COG2315	K	PredictedDNA-bindingproteinwithëdouble-wingístructuralmotif,MmcQ/YjbRfamily		MmcQ
AUO97_RS02785	COG0142	H	Geranylgeranylpyrophosphatesynthase	Isoprenoidbiosynthesis	IspA
AUO97_RS02790	COG2828	C	2-Methylaconitatecis-trans-isomerasePrpF(2-methylcitratepathway)		PrpF
AUO97_RS02795	COG1113	E	L-asparaginetransporterorrelatedpermease		AnsP
AUO97_RS02805	COG0693	V	Protein/nucleotidedeglycase,PfpI/YajL/DJ-1family(repairofmethylglyoxal-glycatedproteinsandnucleicacids)		YajL
AUO97_RS02810	COG0604	C	NADPH:quinonereductaseorrelatedZn-dependentoxidoreductase		Qor
AUO97_RS02815	COG2207	K	AraC-typeDNA-bindingdomainandAraC-containingproteins		AraC
AUO97_RS02820	COG1968	I	Undecaprenylpyrophosphatephosphatase		UppP
AUO97_RS02825	COG3327	K	DNA-bindingtranscriptionalregulatorPaaX(phenylaceticaciddegradation)		PaaX
AUO97_RS02825	COG3327	K	DNA-bindingtranscriptionalregulatorPaaX(phenylaceticaciddegradation)		PaaX
AUO97_RS02830	COG3239	I	Fattyaciddesaturase		DesA
AUO97_RS02835	COG2207	K	AraC-typeDNA-bindingdomainandAraC-containingproteins		AraC
AUO97_RS02840	COG2249	R	PutativeNADPH-quinonereductase(modulatorofdrugactivityB)		MdaB
AUO97_RS02845	COG2067	I	Long-chainfattyacidtransportprotein		FadL
AUO97_RS02845	COG2067	I	Long-chainfattyacidtransportprotein		FadL
AUO97_RS02850	COG0560	E	Phosphoserinephosphatase	Serinebiosynthesis	SerB
AUO97_RS02855	COG0175	E	3'-phosphoadenosine5'-phosphosulfatesulfotransferase(PAPSreductase)/FADsynthetaseorrelatedenzyme	Cysteinebiosynthesis	CysD
AUO97_RS02860
AUO97_RS02865	COG1530	J	RibonucleaseGorE		CafA
AUO97_RS02870	COG0424	Q	7-methyl-GTPpyrophosphataseandrelatedNTPpyrophosphatases,Maf/HAM1superfamily		Maf
AUO97_RS02875	COG2891	M	Cellshape-determiningproteinMreD		MreD
AUO97_RS02880	COG1792	D	Cellshape-determiningproteinMreC		MreC
AUO97_RS02885	COG1077	D	Cellshape-determiningATPaseMreB,actin-likesuperfamily		MreB
AUO97_RS02890	COG0721	J	Asp-tRNAAsn/Glu-tRNAGlnamidotransferaseCsubunit	Aminoacyl-tRNAsynthetases	GatC
AUO97_RS02895	COG0154	J	Asp-tRNAAsn/Glu-tRNAGlnamidotransferaseAsubunitorrelatedamidase	Aminoacyl-tRNAsynthetases	GatA
AUO97_RS02900	COG0064	J	Asp-tRNAAsn/Glu-tRNAGlnamidotransferaseBsubunit	Aminoacyl-tRNAsynthetases	GatB
AUO97_RS02905	COG0693	V	Protein/nucleotidedeglycase,PfpI/YajL/DJ-1family(repairofmethylglyoxal-glycatedproteinsandnucleicacids)		YajL
AUO97_RS02910
AUO97_RS02915
AUO97_RS02920
AUO97_RS02930	COG1133	V	PeptideantibiotictransporterSbmA/BacA,ABC-typepermeasefamily		SbmA
AUO97_RS02935	COG1171	E	Threoninedeaminase	Isoleucine,leucine,valinebiosynthesis	IlvA
AUO97_RS02940	COG1752	R	Predictedacylesterase/phospholipaseRssA,containdpatatindomain		RssA
AUO97_RS02945	COG1115	E	Na+/alaninesymporter		AlsT
AUO97_RS02950
AUO97_RS02955	COG0778	C	Nitroreductase	Pyrimidinedegradation	NfnB
AUO97_RS02960	COG2814	G	PredictedarabinoseeffluxpermeaseAraJ,MFSfamily		AraJ
AUO97_RS02965	COG1289	S	UncharacterizedmembraneproteinYccC		YccC
AUO97_RS02970
AUO97_RS02975	COG3182	S	PepSY-associatedTMregion		PiuB
AUO97_RS02980	COG1434	M	LipidcarrierproteinElyCinvolvedincellwallbiogenesis,DUF218family		ElyC
AUO97_RS03015	COG1376	M	Lipoprotein-anchoringtranspeptidaseErfK/SrfK		ErfK
AUO97_RS03020	COG2832	S	UncharacterizedmembraneproteinYbaN,DUF454family		YbaN
AUO97_RS03025	COG3782	S	Uncharacterizedconservedprotein,DUF1853domain
AUO97_RS03030	COG5510	S	Predictedsmallsecretedprotein
AUO97_RS03035	COG0624	E	Acetylornithinedeacetylase/Succinyl-diaminopimelatedesuccinylaseorrelateddeacylase	Argininebiosynthesis	ArgE
AUO97_RS03040
AUO97_RS03045	COG0745	T	DNA-bindingresponseregulator,OmpRfamily,containsRECandwinged-helix(wHTH)domain		OmpR
AUO97_RS03050	COG0840	T	Methyl-acceptingchemotaxisprotein(MCP)		Tar
AUO97_RS03055	COG0835	T	ChemotaxissignaltransductionproteinCheW		CheW
AUO97_RS03060	COG0745	T	DNA-bindingresponseregulator,OmpRfamily,containsRECandwinged-helix(wHTH)domain		OmpR
AUO97_RS03065	COG0745	T	DNA-bindingresponseregulator,OmpRfamily,containsRECandwinged-helix(wHTH)domain		OmpR
AUO97_RS03070
AUO97_RS03075	COG0845	M	MultidrugeffluxpumpsubunitAcrA(membrane-fusionprotein)		AcrA
AUO97_RS03080	COG0841	V	MultidrugeffluxpumpsubunitAcrB		AcrB
AUO97_RS03085	COG0442	J	Prolyl-tRNAsynthetase	Aminoacyl-tRNAsynthetases	ProS
AUO97_RS03090	COG3422	S	UncharacterizedconservedproteinYegP,UPF0339family		YegP
AUO97_RS03095	COG2824	R	UncharacterizedZn-ribbon-containingprotein		PhnA
AUO97_RS03100	COG3189	S	UncharacterizedconservedproteinYeaO,DUF488family		YeaO
AUO97_RS03105	COG3832	I	Chalcone/flavanone-bindingproteinYndB,AHSA1/START/SRPBCCdomain		YndB
AUO97_RS03110	COG0354	O	Folate-bindingproteinYgfZ,synthesisandrepairofFe-Sclusters		YgfZ
AUO97_RS03115	COG1651	O	Proteinthiol-disulfideisomeraseDsbC		DsbG
AUO97_RS03120	COG0790	R	TPRrepeat		TPR
AUO97_RS03125	COG0679	R	Predictedpermease,AEC(auxineffluxcarrier)family		YfdV
AUO97_RS03130	COG1902	C	2,4-dienoyl-CoAreductaseorrelatedNADH-dependentreductase,OldYellowEnzyme(OYE)family		FadH
AUO97_RS03135	COG1629	P	Outermembranereceptorprotein,Fetransport		CirA
AUO97_RS03140	COG2094	L	3-methyladenineDNAglycosylaseMpg		Mpg
AUO97_RS03145	COG0266	L	Formamidopyrimidine-DNAglycosylase		Nei
AUO97_RS03150	COG0760	O	Peptidyl-prolylisomerase,parvulinfamily		SurA
AUO97_RS03155	COG2105	E	Predictedgamma-glutamylaminecyclotransferaseYtfP,GGCT/AIG2-likefamily		YtfP
AUO97_RS03160	COG1970	M	Large-conductancemechanosensitivechannel		MscL
AUO97_RS03165	COG1217	T	PredictedmembraneGTPaseTypA/BipAinvolvedinstressresponse		TypA
AUO97_RS03170	COG2233	F	Xanthine/uracilpermease	Pyrimidinedegradation	UraA
AUO97_RS03175	COG2813	J	16SrRNAG1207methylaseRsmC	16SrRNAmodification	RsmC
AUO97_RS03180	COG0833	E	Aminoacidpermease		LysP
AUO97_RS03185	COG1690	J	RNA-splicingligaseRtcB,repairstRNAdamage		RtcB
AUO97_RS03195	COG2885	M	OutermembraneproteinOmpAandrelatedpeptidoglycan-associated(lipo)proteins		OmpA
AUO97_RS03200	COG4970	N	TypeIVpilusassemblyproteinFimT		FimT
AUO97_RS03205	COG0183	I	Acetyl-CoAacetyltransferase	Fattyacidbiosynthesis	PaaJ
AUO97_RS03205	COG0183	I	Acetyl-CoAacetyltransferase	Fattyacidbiosynthesis	PaaJ
AUO97_RS03210	COG2764	C	Zn-dependentglyoxalase,PhnBfamily		PhnB
AUO97_RS03215	COG2076	V	MultidrugtransporterEmrEandrelatedcationtransporters		EmrE
AUO97_RS03220	COG3749	S	Uncharacterizedconservedprotein,DUF934family
AUO97_RS03225	COG0155	P	Sulfitereductase,betasubunit(hemoprotein)	Cysteinebiosynthesis	CysI
AUO97_RS03230	COG4993	G	Glucosedehydrogenase,PQQ-dependent		Gcd
AUO97_RS03235	COG3659	M	Carbohydrate-selectiveporinOprB		OprB
AUO97_RS03240	COG1804	I	Crotonobetainyl-CoA:carnitineCoA-transferaseCaiBandrelatedacyl-CoAtransferases		CaiB
AUO97_RS03245	COG2207	K	AraC-typeDNA-bindingdomainandAraC-containingproteins		AraC
AUO97_RS03250	COG0183	I	Acetyl-CoAacetyltransferase	Fattyacidbiosynthesis	PaaJ
AUO97_RS03255	COG1250	I	3-hydroxyacyl-CoAdehydrogenase	Fattyacidbiosynthesis	FadB
AUO97_RS03255	COG1250	I	3-hydroxyacyl-CoAdehydrogenase	Fattyacidbiosynthesis	FadB
AUO97_RS03260
AUO97_RS03265	COG4667	I	Predictedphospholipase,patatin/cPLA2family		YjjU
AUO97_RS03270	COG2153	R	PredictedN-acyltransferase,GNATfamily		ElaA
AUO97_RS03275
AUO97_RS03280	COG1272	U	Predictedmembranechannel-formingproteinYqfA,hemolysinIIIfamily		YqfA
AUO97_RS03285
AUO97_RS03290
AUO97_RS03295	COG0653	U	PreproteintranslocasesubunitSecA(ATPase,RNAhelicase)		SecA
AUO97_RS03300	COG0450	V	AlkylhydroperoxidereductasesubunitAhpC(peroxiredoxin)		AhpC
AUO97_RS03305	COG0491	R	Glyoxylaseorarelatedmetal-dependenthydrolase,beta-lactamasesuperfamilyII		GloB
AUO97_RS03310	COG2365	T	Proteintyrosine/serinephosphataseOca4		Oca4
AUO97_RS03315
AUO97_RS03320	COG0285	H	Folylpolyglutamatesynthase/Dihydropteroatesynthase	Folatebiosynthesis	FolC
AUO97_RS03325	COG0777	I	Acetyl-CoAcarboxylasebetasubunit	Fattyacidbiosynthesis	AccD
AUO97_RS03330	COG0159	E	Tryptophansynthasealphachain	Aromaticaminoacidbiosynthesis	TrpA
AUO97_RS03335	COG2207	K	AraC-typeDNA-bindingdomainandAraC-containingproteins		AraC
AUO97_RS03340	COG3687	R	Predictedmetal-dependenthydrolase
AUO97_RS03345
AUO97_RS03350
AUO97_RS03355	COG0133	E	Tryptophansynthasebetachain	Aromaticaminoacidbiosynthesis	TrpB
AUO97_RS03360	COG0135	E	Phosphoribosylanthranilateisomerase	Aromaticaminoacidbiosynthesis	TrpF
AUO97_RS03365	COG4206	H	OutermembranecobalaminreceptorproteinBtuB		BtuB
AUO97_RS03370	COG2096	H	Cob(II)alaminadenosyltransferase	Cobalamine/B12biosynthesis	PduO
AUO97_RS03375	COG0584	I	Glycerophosphoryldiesterphosphodiesterase		UgpQ
AUO97_RS03380	COG3187	O	HeatshockproteinHslJ		HslJ
AUO97_RS03385	COG1398	I	Fatty-aciddesaturase		OLE1
AUO97_RS03385	COG1398	I	Fatty-aciddesaturase		OLE1
AUO97_RS03390	COG0397	O	Proteinadenylyltransferase(AMPylase)SelO/YdiU(selenoproteinO)		SelO
AUO97_RS03395	COG0745	T	DNA-bindingresponseregulator,OmpRfamily,containsRECandwinged-helix(wHTH)domain		OmpR
AUO97_RS03400	COG5002	T	SensorhistidinekinaseWalK		WalK
AUO97_RS03400	COG5002	T	SensorhistidinekinaseWalK		WalK
AUO97_RS03405
AUO97_RS03410	COG1960	I	Acyl-CoAdehydrogenaserelatedtothealkylationresponseproteinAidB	Fattyacidbiosynthesis	CaiA
AUO97_RS03410	COG1960	I	Acyl-CoAdehydrogenaserelatedtothealkylationresponseproteinAidB	Fattyacidbiosynthesis	CaiA
AUO97_RS03415	COG1960	I	Acyl-CoAdehydrogenaserelatedtothealkylationresponseproteinAidB	Fattyacidbiosynthesis	CaiA
AUO97_RS03420	COG3223	R	Phosphatestarvation-induciblemembranePsiE(functionunknown)		PsiE
AUO97_RS03425	COG5455	P	PeriplasmicregulatorRcnBofNiandCoefflux		RcnB
AUO97_RS03430
AUO97_RS03435	COG1502	I	Phosphatidylserine/phosphatidylglycerophosphate/cardiolipinsynthase	Phospholipidbiosynthesis	Cls
AUO97_RS03440	COG1629	P	Outermembranereceptorprotein,Fetransport		CirA
AUO97_RS03440	COG1629	P	Outermembranereceptorprotein,Fetransport		CirA
AUO97_RS03440	COG1629	P	Outermembranereceptorprotein,Fetransport		CirA
AUO97_RS03440	COG1629	P	Outermembranereceptorprotein,Fetransport		CirA
AUO97_RS03445
AUO97_RS03450	COG0173	J	Aspartyl-tRNAsynthetase	Aminoacyl-tRNAsynthetases	AspS
AUO97_RS03455
AUO97_RS03465	COG0381	M	UDP-N-acetylglucosamine2-epimerase		WecB
AUO97_RS03470	COG3306	M	GlycosyltransferaseinvolvedinLPSbiosynthesis,GR25family
AUO97_RS03475
AUO97_RS03480	COG0438	M	Glycosyltransferaseinvolvedincellwallbisynthesis		RfaB
AUO97_RS03485	COG0463	M	Glycosyltransferaseinvolvedincellwallbisynthesis		WcaA
AUO97_RS03490	COG0726	G	Peptidoglycan/xylan/chitindeacetylase,PgdA/NodB/CDA1family		CDA1
AUO97_RS03495
AUO97_RS03500	COG3660	D	MitochondrialfissionproteinELM1		ELM1
AUO97_RS03500	COG3660	D	MitochondrialfissionproteinELM1		ELM1
AUO97_RS03505	COG0115	E	Branched-chainaminoacidaminotransferase/4-amino-4-deoxychorismatelyase	Isoleucine,leucine,valinebiosynthesis	IlvE
AUO97_RS03510	COG1391	O	Glutaminesynthetaseadenylyltransferase		GlnE1
AUO97_RS03515	COG0642	T	Signaltransductionhistidinekinase		BaeS
AUO97_RS03535	COG0782	K	Transcriptionelongationfactor,GreA/GreBfamily		GreA
AUO97_RS03545	COG1396	K	Transcriptionalregulator,containsXRE-familyHTHdomain		HipB
AUO97_RS03545	COG1396	K	Transcriptionalregulator,containsXRE-familyHTHdomain		HipB
AUO97_RS03550
AUO97_RS03560	COG0582	L	Integrase/recombinase,includesphageintegrase		FimB
AUO97_RS03560	COG0582	L	Integrase/recombinase,includesphageintegrase		FimB
AUO97_RS03570	COG0809	J	S-adenosylmethionine:tRNA-ribosyltransferase-isomerase(queuinesynthetase)	tRNAmodification	QueA
AUO97_RS03575
AUO97_RS03575
AUO97_RS03580	COG1704	M	MagnetosomeformationproteinMamQ,lipoproteinantigenLemAfamily		LemA
AUO97_RS03585	COG0343	J	Queuine/archaeosinetRNA-ribosyltransferase	tRNAmodification	Tgt
AUO97_RS03590	COG1862	U	ProteintranslocasesubunitYajC		YajC
AUO97_RS03595	COG0342	U	PreproteintranslocasesubunitSecD		SecD
AUO97_RS03600	COG0341	U	PreproteintranslocasesubunitSecF		SecF
AUO97_RS03605	COG0452	H	Phosphopantothenoylcysteinesynthetase/decarboxylaseCoaBC	Pantothenate/CoAbiosynthesis	CoaBC
AUO97_RS03610	COG2003	L	DNArepairproteinRadC,containsahelix-hairpin-helixDNA-bindingmotif		RadC
AUO97_RS03615	COG3781	P	Predictedmembranechloridechannel,bestrophinfamily		YneE
AUO97_RS03620	COG0613	F	5'-3'exoribonucleaseTrpH/YciV(RNaseAM),containsPHPdomain		YciV
AUO97_RS03625	COG2917	D	IntracellularseptationproteinA		YciB
AUO97_RS03630	COG2350	Q	YciIsuperfamilyenzyme,includes5-CHQdehydrochlorinase,containsactive-sitepHis		YciI
AUO97_RS03635
AUO97_RS03640	COG4121	J	tRNAU345-methylaminomethyl-2-thiouridine-formingmethyltransferaseMnmC	tRNAmodification	MnmC
AUO97_RS03640	COG4121	J	tRNAU345-methylaminomethyl-2-thiouridine-formingmethyltransferaseMnmC	tRNAmodification	MnmC
AUO97_RS03645	COG0607	P	Rhodanese-relatedsulfurtransferase	Ureacycle	PspE
AUO97_RS03650	COG1666	T	Cyclicdi-GMP-bindingproteinYajQ,UPF0234family		YajQ
AUO97_RS03680	COG0789	K	DNA-bindingtranscriptionalregulator,MerRfamily		SoxR
AUO97_RS03680	COG0789	K	DNA-bindingtranscriptionalregulator,MerRfamily		SoxR
AUO97_RS03685	COG1230	P	Co/Zn/Cdeffluxsystemcomponent		CzcD
AUO97_RS03725	COG3667	P	Uncharacterizedconservedproteininvolvedincopperresistance		PcoB
AUO97_RS03740	COG0745	T	DNA-bindingresponseregulator,OmpRfamily,containsRECandwinged-helix(wHTH)domain		OmpR
AUO97_RS03740	COG0745	T	DNA-bindingresponseregulator,OmpRfamily,containsRECandwinged-helix(wHTH)domain		OmpR
AUO97_RS03745	COG0642	T	Signaltransductionhistidinekinase		BaeS
AUO97_RS03765
AUO97_RS03770
AUO97_RS03790
AUO97_RS03805
AUO97_RS03830
AUO97_RS03850	COG2050	Q	Acyl-CoAthioesterasePaaI,containsHGGmotif		PaaI
AUO97_RS03855	COG1607	I	Acyl-CoAhydrolase		YciA
AUO97_RS03860	COG3118	O	ChaperedoxinCnoX,containsthioredoxin-likeandTPR-likedomains,YbbN/TrxSCfamily		CnoX
AUO97_RS03865	COG1073	T	Fermentation-respirationswitchesteraseFrsA,DUF1100family		FrsA
AUO97_RS03870	COG3453	R	Predictedphosphohydrolase,proteintyrosinephosphatase(PTP)superfamily,DUF442family
AUO97_RS03875
AUO97_RS03880	COG1249	C	Dihydrolipoamidedehydrogenase(E3)componentofpyruvate/2-oxoglutaratedehydrogenasecomplexorglutathioneoxidoreductase	GlycinecleavagePyruvateoxidation	Lpd
AUO97_RS03910
AUO97_RS03915	COG2199	T	GGDEFdomain,diguanylatecyclase(c-di-GMPsynthetase)oritsenzymaticallyinactivevariants		GGDEF
AUO97_RS03920	COG2885	M	OutermembraneproteinOmpAandrelatedpeptidoglycan-associated(lipo)proteins		OmpA
AUO97_RS03925	COG1408	R	Predictedphosphohydrolase,MPPsuperfamily		YaeI
AUO97_RS03930	COG1502	I	Phosphatidylserine/phosphatidylglycerophosphate/cardiolipinsynthase	Phospholipidbiosynthesis	Cls
AUO97_RS03930	COG1502	I	Phosphatidylserine/phosphatidylglycerophosphate/cardiolipinsynthase	Phospholipidbiosynthesis	Cls
AUO97_RS03935	COG0204	I	1-acyl-sn-glycerol-3-phosphateacyltransferase	Phospholipidbiosynthesis	PlsC
AUO97_RS03940	COG2262	J	50Sribosomalsubunit-associatedGTPaseHflX		HflX
AUO97_RS03945
AUO97_RS03950	COG1346	M	Putativeeffectorofmureinhydrolase		LrgB
AUO97_RS03955	COG4731	S	Uncharacterizedconservedprotein,DUF2147family
AUO97_RS03960
AUO97_RS03965	COG0030	J	16SrRNAA1518andA1519N6-dimethyltransferaseRsmA/KsgA/DIM1(mayalsohaveDNAglycosylase/APlyaseactivity)	16SrRNAmodification	RsmA
AUO97_RS03970	COG1995	H	4-hydroxy-L-threoninephosphatedehydrogenasePdxA	Pyridoxalphosphatebiosynthesis	PdxA
AUO97_RS03975	COG0102	J	RibosomalproteinL13	Ribosome50Ssubunit	RplM
AUO97_RS03980	COG0103	J	RibosomalproteinS9	Ribosome30Ssubunit	RpsI
AUO97_RS03985	COG0625	O	GlutathioneS-transferase		GstA
AUO97_RS03990	COG2969	O	StringentstarvationproteinB,bindsSsrApeptide		SspB
AUO97_RS03995
AUO97_RS04000	COG4770	I	Acetyl/propionyl-CoAcarboxylase,alphasubunit		PccA
AUO97_RS04005	COG1024	I	Enoyl-CoAhydratase/carnithineracemase	Fattyacidbiosynthesis	CaiD
AUO97_RS04010	COG1960	I	Acyl-CoAdehydrogenaserelatedtothealkylationresponseproteinAidB	Fattyacidbiosynthesis	CaiA
AUO97_RS04015	COG4799	I	Acetyl-CoAcarboxylase,carboxyltransferasecomponent		MmdA
AUO97_RS04020	COG1028	I	NAD(P)-dependentdehydrogenase,short-chainalcoholdehydrogenasefamily	Fattyacidbiosynthesis	FabG
AUO97_RS04025
AUO97_RS04025
AUO97_RS04030	COG1309	K	DNA-bindingprotein,AcrRfamily,includesnucleoidocclusionproteinSlmA		AcrR
AUO97_RS04035	COG1960	I	Acyl-CoAdehydrogenaserelatedtothealkylationresponseproteinAidB	Fattyacidbiosynthesis	CaiA
AUO97_RS04040
AUO97_RS04045	COG3791	S	Uncharacterizedconservedprotein
AUO97_RS04075
AUO97_RS04075
AUO97_RS04080	COG1183	I	Phosphatidylserinesynthase		PssA
AUO97_RS04085	COG2961	J	23SrRNAA2030N6-methylaseRlmJ	23SrRNAmodification	RlmJ
AUO97_RS04090	COG3751	J	Proline4-hydroxylase(includesRps23Pro-643,4-dihydroxylaseTpa1),containsSM-20domain		EGL9
AUO97_RS04095
AUO97_RS04100
AUO97_RS04105	COG0039	C	Malate/lactatedehydrogenase	TCAcycle	Mdh
AUO97_RS04110	COG3719	J	RibonucleaseI		RnaI
AUO97_RS04115	COG0741	M	Solublelyticmureintransglycosylaseorregulatoryproteins(maycontainLysM/invasindomain)		MltE
AUO97_RS04120	COG0621	J	tRNAA37methylthiotransferaseMiaB	tRNAmodification	MiaB
AUO97_RS04125	COG1702	T	Phosphatestarvation-inducibleproteinPhoH,predictedATPase		PhoH
AUO97_RS04130	COG0319	J	ssRNA-specificRNaseYbeY,16SrRNAmaturationenzyme	16SrRNAmodification	YbeY
AUO97_RS04135	COG0810	M	PeriplasmicproteinTonB,linksinnerandoutermembranes		TonB
AUO97_RS04140
AUO97_RS04145
AUO97_RS04150	COG0503	F	Adenine/guaninephosphoribosyltransferaseorrelatedPRPP-bindingprotein	Purinesalvage	Apt
AUO97_RS04155	COG0655	C	MultimericflavodoxinWrbA,includesNAD(P)H:quinoneoxidoreductase		WrbA
AUO97_RS04160	COG1295	S	Uncharacterizedmembraneprotein,BrkB/YihY/UPF0761family(notanRNase)		BrkB
AUO97_RS04165	COG0697	G	Permeaseofthedrug/metabolitetransporter(DMT)superfamily		RhaT
AUO97_RS04170	COG2207	K	AraC-typeDNA-bindingdomainandAraC-containingproteins		AraC
AUO97_RS04175	COG0179	Q	2-keto-4-pentenoatehydratase/2-oxohepta-3-ene-1,7-dioicacidhydratase(catecholpathway)		YcgM
AUO97_RS04180
AUO97_RS04185	COG3560	R	Fattyacidrepressionmutantprotein(predictedoxidoreductase)		FMR2
AUO97_RS04195
AUO97_RS04200	COG0560	E	Phosphoserinephosphatase	Serinebiosynthesis	SerB
AUO97_RS04220	COG0557	K	ExoribonucleaseR		VacB
AUO97_RS04225	COG0339	O	Zn-dependentoligopeptidase,M3family		Dcp
AUO97_RS04230	COG3529	R	Predictednucleic-acid-bindingprotein,containsZn-ribbondomain
AUO97_RS04235
AUO97_RS04240	COG1593	G	TRAP-typeC4-dicarboxylatetransportsystem,largepermeasecomponent		DctQ
AUO97_RS04245
AUO97_RS04250
AUO97_RS04255
AUO97_RS04260	COG2938	O	Succinatedehydrogenaseflavin-addingprotein,antitoxincomponentoftheCptABtoxin-antitoxinmodule		SdhE
AUO97_RS04265	COG1960	I	Acyl-CoAdehydrogenaserelatedtothealkylationresponseproteinAidB	Fattyacidbiosynthesis	CaiA
AUO97_RS04270	COG2072	P	PredictedflavoproteinCzcOassociatedwiththecationdiffusionfacilitatorCzcD		CzcO
AUO97_RS04275	COG0203	J	RibosomalproteinL17	Ribosome50Ssubunit	RplQ
AUO97_RS04280	COG0202	K	DNA-directedRNApolymerase,alphasubunit/40kDsubunit	RNApolymerase	RpoA
AUO97_RS04285	COG0522	J	RibosomalproteinS4orrelatedprotein	Ribosome30Ssubunit	RpsD
AUO97_RS04290	COG0100	J	RibosomalproteinS11	Ribosome30Ssubunit	RpsK
AUO97_RS04295	COG0099	J	RibosomalproteinS13	Ribosome30Ssubunit	RpsM
AUO97_RS04300	COG0257	J	RibosomalproteinL36	Ribosome50Ssubunit	RpmJ
AUO97_RS04305	COG0201	U	PreproteintranslocasesubunitSecY		SecY
AUO97_RS04310	COG0200	J	RibosomalproteinL15	Ribosome50Ssubunit	RplO
AUO97_RS04315	COG1841	J	RibosomalproteinL30/L7E	Ribosome50Ssubunit	RpmD
AUO97_RS04320	COG0098	J	RibosomalproteinS5	Ribosome30Ssubunit	RpsE
AUO97_RS04325	COG0256	J	RibosomalproteinL18	Ribosome50Ssubunit	RplR
AUO97_RS04330	COG0097	J	RibosomalproteinL6P/L9E	Ribosome50Ssubunit	RplF
AUO97_RS04335	COG0096	J	RibosomalproteinS8	Ribosome30Ssubunit	RpsH
AUO97_RS04340	COG0199	J	RibosomalproteinS14	Ribosome30Ssubunit	RpsN
AUO97_RS04345	COG0094	J	RibosomalproteinL5	Ribosome50Ssubunit	RplE
AUO97_RS04350	COG0198	J	RibosomalproteinL24	Ribosome50Ssubunit	RplX
AUO97_RS04355	COG0093	J	RibosomalproteinL14	Ribosome50Ssubunit	RplN
AUO97_RS04360	COG0186	J	RibosomalproteinS17	Ribosome30Ssubunit	RpsQ
AUO97_RS04365	COG0255	J	RibosomalproteinL29	Ribosome50Ssubunit	RpmC
AUO97_RS04370	COG0197	J	RibosomalproteinL16/L10AE	Ribosome50Ssubunit	RplP
AUO97_RS04375	COG0092	J	RibosomalproteinS3	Ribosome30Ssubunit	RpsC
AUO97_RS04380	COG0091	J	RibosomalproteinL22	Ribosome50Ssubunit	RplV
AUO97_RS04385	COG0185	J	RibosomalproteinS19	Ribosome30Ssubunit	RpsS
AUO97_RS04390	COG0090	J	RibosomalproteinL2	Ribosome50Ssubunit	RplB
AUO97_RS04395	COG0089	J	RibosomalproteinL23	Ribosome50Ssubunit	RplW
AUO97_RS04400	COG0088	J	RibosomalproteinL4	Ribosome50Ssubunit	RplD
AUO97_RS04405	COG0087	J	RibosomalproteinL3	Ribosome50Ssubunit	RplC
AUO97_RS04410	COG0051	J	RibosomalproteinS10	Ribosome30Ssubunit	RpsJ
AUO97_RS04415	COG0518	F	GMPsynthase,glutamineamidotransferasedomain	Purinebiosynthesis	GuaA1
AUO97_RS04420	COG0626	E	Cystathioninebeta-lyase/cystathioninegamma-synthase	Methioninebiosynthesis	MetC
AUO97_RS04425	COG0433	L	ArchaealDNAhelicaseHerAorarelatedbacterialATPase,containsHAS-barrelandATPasedomains		HerA
AUO97_RS04425	COG0433	L	ArchaealDNAhelicaseHerAorarelatedbacterialATPase,containsHAS-barrelandATPasedomains		HerA
AUO97_RS04430	COG1017	C	Hemoglobin-likeflavoprotein		Hmp
AUO97_RS04435	COG1959	K	DNA-bindingtranscriptionalregulator,IscRfamily		IscR
AUO97_RS04440	COG0218	D	GTP-bindingproteinEngBrequiredfornormalcelldivision		EngB
AUO97_RS04445	COG3687	R	Predictedmetal-dependenthydrolase
AUO97_RS04450	COG1301	C	Na+/H+-dicarboxylatesymporter		GltP
AUO97_RS04455	COG1946	I	Acyl-CoAthioesterase		TesB
AUO97_RS04460	COG2937	I	Glycerol-3-phosphateO-acyltransferase	Phospholipidbiosynthesis	PlsB
AUO97_RS04465
AUO97_RS04470	COG0451	M	Nucleoside-diphosphate-sugarepimerase		WcaG
AUO97_RS04475	COG1200	L	RecG-likehelicase		RecG
AUO97_RS04480	COG1040	R	DNAutilizationproteinComFC/GntX,containsphosphoribosyltransferasedomain		ComFC
AUO97_RS04485	COG1051	F	ADP-ribosepyrophosphataseYjhB,NUDIXfamily		YjhB
AUO97_RS04490	COG1611	F	NucleotidemonophosphatenucleosidasePpnN/YdgH,LonelyGuy(LOG)family		PpnN
AUO97_RS04495	COG0598	P	Mg2+andCo2+transporterCorA		CorA
AUO97_RS04500
AUO97_RS04505	COG2854	M	PeriplasmicsubunitMlaCoftheABC-typeintermembranephospholipidtransporterMla		MlaC
AUO97_RS04510	COG1463	M	PeriplasmicsubunitMlaDoftheABC-typeintermembranephospholipidtransporterMla		MlaD
AUO97_RS04515	COG0767	M	PermeasesubunitMlaEoftheABC-typeintermembranephospholipidtransporterMla		MlaE
AUO97_RS04520	COG1127	M	ATPasesubunitMlaFoftheABC-typeintermembranephospholipidtransporterMla		MlaF
AUO97_RS04525	COG0513	L	SuperfamilyIIDNAandRNAhelicase		SrmB
AUO97_RS04530	COG0483	G	Archaealfructose-1,6-bisphosphataseorrelatedenzyme,inositolmonophosphatasefamily	Gluconeogenesis	SuhB
AUO97_RS04535	COG1154	H	Deoxyxylulose-5-phosphatesynthase	Pyridoxalphosphatebiosynthesis	Dxs
AUO97_RS04535	COG1154	H	Deoxyxylulose-5-phosphatesynthase	Pyridoxalphosphatebiosynthesis	Dxs
AUO97_RS04540	COG0807	H	GTPcyclohydrolaseII	Riboflavin/FADbiosynthesis	RibA
AUO97_RS04545	COG0408	H	Coproporphyrinogen-IIIoxidaseHemH,oxygen-dependent	Hemebiosynthesis	HemF
AUO97_RS04550	COG0169	E	Shikimate5-dehydrogenase	Aromaticaminoacidbiosynthesis	AroE
AUO97_RS04555
AUO97_RS04560	COG1960	I	Acyl-CoAdehydrogenaserelatedtothealkylationresponseproteinAidB	Fattyacidbiosynthesis	CaiA
AUO97_RS04565
AUO97_RS04570	COG1983	K	PhageshockproteinPspC(stress-responsivetranscriptionalregulator)		PspC
AUO97_RS04575	COG3448	T	CBS-domain-containingmembraneprotein
AUO97_RS04575	COG3448	T	CBS-domain-containingmembraneprotein
AUO97_RS04580
AUO97_RS04585	COG4277	R	PredictedDNAmodificationorrepairprotein,containsradicalSAMandhelix-hairpin-helixdomains
AUO97_RS04590	COG2814	G	PredictedarabinoseeffluxpermeaseAraJ,MFSfamily		AraJ
AUO97_RS04595	COG0752	J	Glycyl-tRNAsynthetase,alphasubunit	Aminoacyl-tRNAsynthetases	GlyQ
AUO97_RS04600	COG0751	J	Glycyl-tRNAsynthetase,betasubunit	Aminoacyl-tRNAsynthetases	GlyS
AUO97_RS04620	COG0697	G	Permeaseofthedrug/metabolitetransporter(DMT)superfamily		RhaT
AUO97_RS04625	COG0583	K	DNA-bindingtranscriptionalregulator,LysRfamily		LysR
AUO97_RS04630
AUO97_RS04635
AUO97_RS04640	COG1404	O	Serineprotease,subtilisinfamily		AprE
AUO97_RS04645
AUO97_RS04650
AUO97_RS04655	COG2988	E	Succinylglutamatedesuccinylase		AstE
AUO97_RS04660	COG3724	E	Succinylargininedihydrolase		AstB
AUO97_RS04665	COG1012	I	Acyl-CoAreductaseorotherNAD-dependentaldehydedehydrogenase	Prolinedegradation	AdhE
AUO97_RS04670	COG3138	E	Arginine/ornithineN-succinyltransferasebetasubunit		AstA
AUO97_RS04675	COG4992	E	Acetylornithine/succinyldiaminopimelate/putrescineaminotransferase	Argininebiosynthesis	ArgD
AUO97_RS04680	COG0334	E	Glutamatedehydrogenase/leucinedehydrogenase	Glutaminebiosynthesis	GdhA
AUO97_RS04685	COG0833	E	Aminoacidpermease		LysP
AUO97_RS04690
AUO97_RS04695	COG2226	H	Ubiquinone/menaquinonebiosynthesisC-methylaseUbiE/MenG	Biotinbiosynthesis	UbiE
AUO97_RS04700
AUO97_RS04705
AUO97_RS04710	COG4741	F	PredictedsecretedendonucleasedistantlyrelatedtoarchaealHollidayjunctionresolvase
AUO97_RS04715	COG1192	D	ParA-likeATPaseinvolvedinchromosome/plasmidpartitioningorcellulosebiosynthesisproteinBcsQ		ParA
AUO97_RS04720	COG0628	R	PredictedPurR-regulatedpermeasePerM		PerM
AUO97_RS04725	COG2032	P	Cu/Znsuperoxidedismutase		SodC
AUO97_RS04730	COG1289	S	UncharacterizedmembraneproteinYccC		YccC
AUO97_RS04735	COG2814	G	PredictedarabinoseeffluxpermeaseAraJ,MFSfamily		AraJ
AUO97_RS04740
AUO97_RS04745	COG2249	R	PutativeNADPH-quinonereductase(modulatorofdrugactivityB)		MdaB
AUO97_RS04750	COG1359	C	QuinolmonooxygenaseYgiN		YgiN
AUO97_RS04755
AUO97_RS04760	COG0277	C	FAD/FMN-containinglactatedehydrogenase/glycolateoxidase		GlcD
AUO97_RS04765	COG0111	H	Phosphoglyceratedehydrogenaseorrelateddehydrogenase	Serinebiosynthesis	SerA
AUO97_RS04770	COG5006	E	Threonine/homoserineeffluxtransporterRhtA		RhtA
AUO97_RS04775	COG5006	E	Threonine/homoserineeffluxtransporterRhtA		RhtA
AUO97_RS04780
AUO97_RS04785	COG0730	P	SulfiteexporterTauE/SafE/YfcAandrelatedpermeases,UPF0721family		TauE
AUO97_RS04790	COG0130	J	tRNAU55pseudouridinesynthaseTruB,mayalsoworkonU342oftmRNA	tRNAmodification	TruB
AUO97_RS04795	COG5380	O	LipasechaperoneLimK		LimK
AUO97_RS04800	COG1075	I	Triacylglycerolesterase/lipaseEstA,alpha/betahydrolasefold		EstA
AUO97_RS04805	COG0335	J	RibosomalproteinL19	Ribosome50Ssubunit	RplS
AUO97_RS04810	COG0336	J	tRNAG37N-methylaseTrmD	tRNAmodification	TrmD
AUO97_RS04815	COG0806	J	Ribosomal30SsubunitmaturationfactorRimM,requiredfor16SrRNAprocessing	16SrRNAmodification	RimM
AUO97_RS04820	COG0228	J	RibosomalproteinS16	Ribosome30Ssubunit	RpsP
AUO97_RS04825	COG4968	N	TypeIVpilusassemblyproteinPilE		PilE
AUO97_RS04830	COG4968	N	TypeIVpilusassemblyproteinPilE		PilE
AUO97_RS04835	COG3419	N	TypeIVpilusassemblyprotein,tip-associatedadhesinPilY1		PilY1
AUO97_RS04840
AUO97_RS04845	COG4966	N	TypeIVpilusassemblyproteinPilW		PilW
AUO97_RS04850	COG4967	N	TypeIVpilusassemblyproteinPilV		PilV
AUO97_RS04855	COG4970	N	TypeIVpilusassemblyproteinFimT		FimT
AUO97_RS04860	COG0761	I	4-Hydroxy-3-methylbut-2-enyldiphosphatereductaseIspH	Isoprenoidbiosynthesis	IspH
AUO97_RS04865	COG0194	F	Guanylatekinase		Gmk
AUO97_RS04870	COG1758	K	DNA-directedRNApolymerase,subunitK/omega	RNApolymerase	RpoZ
AUO97_RS04875	COG0317	T	(p)ppGppsynthase/hydrolase,HDsuperfamily		SpoT
AUO97_RS04880	COG0251	V	EnaminedeaminaseRidA,housecleaningofreactiveenamineintermediates,YjgF/YER057c/UK114family	Pyrimidinedegradation	RidA
AUO97_RS04880	COG0251	V	EnaminedeaminaseRidA,housecleaningofreactiveenamineintermediates,YjgF/YER057c/UK114family	Pyrimidinedegradation	RidA
AUO97_RS04885	COG2906	P	Bacterioferritin-associatedferredoxin		Bfd
AUO97_RS04890	COG2193	P	Bacterioferritin(cytochromeb1)		Bfr
AUO97_RS04895
AUO97_RS04895
AUO97_RS04900	COG4969	N	TypeIVpilusassemblyprotein,majorpilinPilA		PilA
AUO97_RS04905	COG3762	S	Uncharacterizedmembraneprotein
AUO97_RS04910	COG1512	S	UncharacterizedmembraneproteinYgcG,containsaTPM-folddomain		YgcG
AUO97_RS04915	COG1704	M	MagnetosomeformationproteinMamQ,lipoproteinantigenLemAfamily		LemA
AUO97_RS04920	COG3687	R	Predictedmetal-dependenthydrolase
AUO97_RS04925	COG0493	E	NADPH-dependentglutamatesynthasebetachainorrelatedoxidoreductase	Glutaminebiosynthesis	GltD
AUO97_RS04930	COG0070	E	Glutamatesynthasedomain3	Glutaminebiosynthesis	GltB3
AUO97_RS04935
AUO97_RS04940	COG0337	E	3-dehydroquinatesynthetase	Aromaticaminoacidbiosynthesis	AroB
AUO97_RS04945	COG0703	E	Shikimatekinase	Aromaticaminoacidbiosynthesis	AroK
AUO97_RS04950	COG4796	U	TypeIIsecretorypathway,componentHofQ		HofQ
AUO97_RS04955	COG3168	N	TypeIVpilusassemblyproteinPilP		PilP
AUO97_RS04960	COG3167	N	TypeIVpilusassemblyproteinPilO		PilO
AUO97_RS04970	COG4972	N	TypeIVpilusassemblyprotein,ATPasePilM		PilM
AUO97_RS04975	COG5009	M	Membranecarboxypeptidase/penicillin-bindingprotein		MrcA
AUO97_RS04980	COG2226	H	Ubiquinone/menaquinonebiosynthesisC-methylaseUbiE/MenG	Biotinbiosynthesis	UbiE
AUO97_RS04985
AUO97_RS04990	COG0472	M	UDP-N-acetylmuramylpentapeptidephosphotransferase/UDP-N-acetylglucosamine-1-phosphatetransferase	Mureinebiosynthesis	Rfe
AUO97_RS04995	COG0770	M	UDP-N-acetylmuramylpentapeptidesynthase	Mureinebiosynthesis	MurF
AUO97_RS05000	COG0769	M	UDP-N-acetylmuramyltripeptidesynthase	Mureinebiosynthesis	MurE
AUO97_RS05005	COG0768	D	CelldivisionproteinFtsI,peptidoglycantranspeptidase(Penicillin-bindingprotein2)		FtsI
AUO97_RS05010	COG3116	D	CelldivisionproteinFtsL,interactswithFtsBandFtsQ		FtsL
AUO97_RS05015	COG0275	J	16SrRNAC1402N4-methylaseRsmH	16SrRNAmodification	RmsH
AUO97_RS05020	COG1613	P	ABC-typesulfatetransportsystem,periplasmiccomponent		Sbp
AUO97_RS05025
AUO97_RS05030	COG0008	J	Glutamyl-orglutaminyl-tRNAsynthetase	Hemebiosynthesis	GlnS
AUO97_RS05045	COG0833	E	Aminoacidpermease		LysP
AUO97_RS05050
AUO97_RS05065
AUO97_RS05070
AUO97_RS05075	COG1230	P	Co/Zn/Cdeffluxsystemcomponent		CzcD
AUO97_RS05080	COG3696	P	Cu/AgeffluxpumpCusA		CusA
AUO97_RS05085	COG0845	M	MultidrugeffluxpumpsubunitAcrA(membrane-fusionprotein)		AcrA
AUO97_RS05090	COG1538	M	OutermembraneproteinTolC		TolC
AUO97_RS05095
AUO97_RS05100
AUO97_RS05105	COG0790	R	TPRrepeat		TPR
AUO97_RS05110	COG0488	R	ATPasecomponentsofABCtransporterswithduplicatedATPasedomains		Uup
AUO97_RS05115	COG2873	E	O-acetylhomoserine/O-acetylserinesulfhydrylase,pyridoxalphosphate-dependent	Methioninebiosynthesis	MET17
AUO97_RS05135	COG0300	R	Short-chaindehydrogenase		YqjQ
AUO97_RS05140	COG0659	P	Sulfatepermeaseorrelatedtransporter,MFSsuperfamily		SUL1
AUO97_RS05145	COG2183	K	TranscriptionalaccessoryproteinTex/SPT6		Tex
AUO97_RS05150	COG0745	T	DNA-bindingresponseregulator,OmpRfamily,containsRECandwinged-helix(wHTH)domain		OmpR
AUO97_RS05155	COG2770	T	HAMPdomain		HAMP
AUO97_RS05160	COG0427	C	PropionylCoA:succinateCoAtransferase		ACH1
AUO97_RS05160	COG0427	C	PropionylCoA:succinateCoAtransferase		ACH1
AUO97_RS05165	COG0456	J	RibosomalproteinS18acetylaseRimIandrelatedacetyltransferases		RimI
AUO97_RS05180
AUO97_RS05185	COG0131	E	ImidazoleglycerolphosphatedehydrataseHisB	Histidinebiosynthesis	HisB2
AUO97_RS05190	COG0118	E	ImidazoleglycerolphosphatesynthaseglutamineamidotransferasesubunitHisH	Histidinebiosynthesis	HisH
AUO97_RS05195	COG3152	S	UncharacterizedmembraneproteinYhaH,DUF805family		yhaH
AUO97_RS05200	COG0349	J	RibonucleaseD		Rnd
AUO97_RS05205	COG0106	E	Phosphoribosylformimino-5-aminoimidazolecarboxamideribonucleotide(ProFAR)isomerase	Histidinebiosynthesis	HisA
AUO97_RS05210	COG1396	K	Transcriptionalregulator,containsXRE-familyHTHdomain		HipB
AUO97_RS05215	COG0697	G	Permeaseofthedrug/metabolitetransporter(DMT)superfamily		RhaT
AUO97_RS05225	COG3671	S	Uncharacterizedmembraneprotein
AUO97_RS05230	COG3326	S	UncharacterizedmembraneproteinYsdA,DUF1294family		YsdA
AUO97_RS05235	COG2334	T	Ser/ThrproteinkinaseRdoAinvolvedinCpxstressresponse,MazFantagonist	Threoninebiosynthesis	SrkA
AUO97_RS05240	COG0107	E	ImidazoleglycerolphosphatesynthasesubunitHisF	Histidinebiosynthesis	HisF
AUO97_RS05245
AUO97_RS05250	COG2207	K	AraC-typeDNA-bindingdomainandAraC-containingproteins		AraC
AUO97_RS05255	COG0580	G	Glyceroluptakefacilitatororrelatedaquaporin(MajorIntrinsicproteinFamily)		GlpF
AUO97_RS05260
AUO97_RS05265	COG1280	E	Threonine/homoserine/homoserinelactoneeffluxprotein		RhtB
AUO97_RS05270	COG1864	F	DNA/RNAendonucleaseG,NUC1		NUC1
AUO97_RS05275
AUO97_RS05280	COG3158	P	K+uptakeproteinKup		Kup
AUO97_RS05300
AUO97_RS05305
AUO97_RS05310
AUO97_RS05315	COG2249	R	PutativeNADPH-quinonereductase(modulatorofdrugactivityB)		MdaB
AUO97_RS05320	COG1733	K	DNA-bindingtranscriptionalregulator,HxlRfamily		HxlR
AUO97_RS05325
AUO97_RS05330
AUO97_RS05340	COG4253	S	Uncharacterizedconservedprotein,DUF2345family
AUO97_RS05345
AUO97_RS05360	COG1309	K	DNA-bindingprotein,AcrRfamily,includesnucleoidocclusionproteinSlmA		AcrR
AUO97_RS05375	COG2207	K	AraC-typeDNA-bindingdomainandAraC-containingproteins		AraC
AUO97_RS05375	COG2207	K	AraC-typeDNA-bindingdomainandAraC-containingproteins		AraC
AUO97_RS05385
AUO97_RS05390
AUO97_RS05395	COG0697	G	Permeaseofthedrug/metabolitetransporter(DMT)superfamily		RhaT
AUO97_RS05400	COG0583	K	DNA-bindingtranscriptionalregulator,LysRfamily		LysR
AUO97_RS05405	COG2814	G	PredictedarabinoseeffluxpermeaseAraJ,MFSfamily		AraJ
AUO97_RS05420	COG3791	S	Uncharacterizedconservedprotein
AUO97_RS05425	COG2230	I	Cyclopropanefatty-acyl-phospholipidsynthaseandrelatedmethyltransferases		Cfa
AUO97_RS05425	COG2230	I	Cyclopropanefatty-acyl-phospholipidsynthaseandrelatedmethyltransferases		Cfa
AUO97_RS05430	COG2907	R	Predictedflavin-containingamineoxidase		Ppro0129
AUO97_RS05430	COG2907	R	Predictedflavin-containingamineoxidase		Ppro0129
AUO97_RS05435	COG1741	R	Redox-sensitivebicupinYhaK,pirinsuperfamily		YhaK
AUO97_RS05440	COG1335	H	Nicotinamidase-relatedamidase	Pyrimidinedegradation	PncA
AUO97_RS05445	COG0583	K	DNA-bindingtranscriptionalregulator,LysRfamily		LysR
AUO97_RS05450	COG1012	I	Acyl-CoAreductaseorotherNAD-dependentaldehydedehydrogenase	Prolinedegradation	AdhE
AUO97_RS05455	COG0160	E	Acetylornithineaminotransferase/4-aminobutyrateaminotransferase	Argininebiosynthesis	ArgD
AUO97_RS05460	COG1167	K	DNA-bindingtranscriptionalregulator,MocRfamily,containsanaminotransferasedomain	Lysinebiosynthesis	ARO8
AUO97_RS05465	COG1113	E	L-asparaginetransporterorrelatedpermease		AnsP
AUO97_RS05470	COG1917	R	Cupindomainproteinrelatedtoquercetindioxygenase		QdoI
AUO97_RS05475	COG1296	E	Predictedbranched-chainaminoacidpermease(azaleucineresistance)		AzlC
AUO97_RS05480
AUO97_RS05485	COG0629	L	Single-strandedDNA-bindingprotein		Ssb
AUO97_RS05485	COG0629	L	Single-strandedDNA-bindingprotein		Ssb
AUO97_RS05490	COG2814	G	PredictedarabinoseeffluxpermeaseAraJ,MFSfamily		AraJ
AUO97_RS05495	COG2899	P	UncharacterizedTerC-relatedmembraneprotein,DUF475domain		TerC2
AUO97_RS05500	COG0819	H	AminopyrimidineaminohydrolaseTenA(thiaminesalvagepathway)		TenA
AUO97_RS05505	COG3136	S	Dual-topologymembraneproteinYdgC,GlpMfamily		GlpM
AUO97_RS05510	COG3759	S	Uncharacterizedmembraneprotein
AUO97_RS05515	COG0604	C	NADPH:quinonereductaseorrelatedZn-dependentoxidoreductase		Qor
AUO97_RS05520	COG1309	K	DNA-bindingprotein,AcrRfamily,includesnucleoidocclusionproteinSlmA		AcrR
AUO97_RS05525	COG0178	L	ExcinucleaseUvrABCATPasesubunit		UvrA
AUO97_RS05530	COG2199	T	GGDEFdomain,diguanylatecyclase(c-di-GMPsynthetase)oritsenzymaticallyinactivevariants		GGDEF
AUO97_RS05535
AUO97_RS05540	COG1292	M	Choline-glycinebetainetransporter		BetT
AUO97_RS05545
AUO97_RS05550	COG4147	C	Na+(orH+)/acetatesymporterActP		ActP
AUO97_RS05555	COG3162	S	Uncharacterizedmembraneprotein,DUF485family		YjcH
AUO97_RS05555	COG3162	S	Uncharacterizedmembraneprotein,DUF485family		YjcH
AUO97_RS05560	COG2202	T	PASdomain		PAS
AUO97_RS05565
AUO97_RS05570	COG2197	T	DNA-bindingresponseregulator,NarL/FixJfamily,containsRECandHTHdomains		CitB
AUO97_RS05575	COG0431	C	NAD(P)H-dependentFMNreductase		SsuE
AUO97_RS05580	COG2141	H	Flavin-dependentoxidoreductase,luciferasefamily(includesalkanesulfonatemonooxygenaseSsuDandmethylenetetrahydromethanopterinreductase)	Pyrimidinedegradation	SsuD
AUO97_RS05580	COG2141	H	Flavin-dependentoxidoreductase,luciferasefamily(includesalkanesulfonatemonooxygenaseSsuDandmethylenetetrahydromethanopterinreductase)	Pyrimidinedegradation	SsuD
AUO97_RS05585	COG1522	K	DNA-bindingtranscriptionalregulator,Lrpfamily		Lrp
AUO97_RS05590	COG1335	H	Nicotinamidase-relatedamidase	Pyrimidinedegradation	PncA
AUO97_RS05595	COG0365	I	Acyl-coenzymeAsynthetase/AMP-(fatty)acidligase		Acs
AUO97_RS05605	COG0668	M	Small-conductancemechanosensitivechannel		MscS
AUO97_RS05610	COG1385	J	16SrRNAU1498N3-methylaseRsmE	16SrRNAmodification	RsmE
AUO97_RS05615	COG1519	M	3-deoxy-D-manno-octulosonic-acidtransferase	LipidAbiosynthesis	KdtA
AUO97_RS05620	COG1902	C	2,4-dienoyl-CoAreductaseorrelatedNADH-dependentreductase,OldYellowEnzyme(OYE)family		FadH
AUO97_RS05625	COG0640	K	DNA-bindingtranscriptionalregulator,ArsRfamily		ArsR
AUO97_RS05625	COG0640	K	DNA-bindingtranscriptionalregulator,ArsRfamily		ArsR
AUO97_RS05625	COG0640	K	DNA-bindingtranscriptionalregulator,ArsRfamily		ArsR
AUO97_RS05630	COG1186	J	ProteinchainreleasefactorPrfB	Translationfactors	PrfB
AUO97_RS05635
AUO97_RS05635
AUO97_RS05635
AUO97_RS05640	COG0608	L	ssDNA-specificexonucleaseRecJ,DHHsuperfamily,maybeinvolvedinarchaealDNAreplicationintiation		RecJ
AUO97_RS05645	COG0259	H	Pyridoxine/pyridoxamine5'-phosphateoxidase	Pyridoxalphosphatebiosynthesis	PdxH
AUO97_RS05650	COG1109	G	Phosphomannomutase		ManB
AUO97_RS05655	COG0516	F	IMPdehydrogenase/GMPreductase	Purinebiosynthesis	GuaB
AUO97_RS05660	COG0727	R	UncharacterizedproteinYkgJ,containsCxxCxxCCmotif		YkgJ
AUO97_RS05665	COG0426	C	Flavorubredoxin		NorV
AUO97_RS05670	COG4774	P	Outermembranereceptorformonomericcatechols		Fiu
AUO97_RS05675	COG2119	R	PutativeCa2+/H+antiporter,TMEM165/GDT1family		Gdt1
AUO97_RS05680
AUO97_RS05685	COG0508	C	Pyruvate/2-oxoglutaratedehydrogenasecomplex,dihydrolipoamideacyltransferase(E2)component	Pyruvateoxidation	AceF
AUO97_RS05690	COG2609	C	Pyruvatedehydrogenasecomplex,dehydrogenase(E1)component	Pyruvateoxidation	AceE
AUO97_RS05695	COG0739	M	MureinDD-endopeptidaseMepMandmureinhydrolaseactivatorNlpD,containsLysMdomain		NlpD
AUO97_RS05700
AUO97_RS05705	COG0774	M	UDP-3-O-acyl-N-acetylglucosaminedeacetylase	LipidAbiosynthesis	LpxC
AUO97_RS05710	COG0206	D	CelldivisionGTPaseFtsZ		FtsZ
AUO97_RS05715	COG0849	D	CelldivisionATPaseFtsA		FtsA
AUO97_RS05720	COG1589	D	CelldivisionseptalproteinFtsQ		FtsQ
AUO97_RS05725	COG1181	M	D-alanine-D-alanineligaseorrelatedATP-graspenzyme	Mureinebiosynthesis	DdlA
AUO97_RS05730	COG0773	M	UDP-N-acetylmuramate-alanineligaseMurCandrelatedligases,MurC/Mplfamily	Mureinebiosynthesis	MurC
AUO97_RS05735	COG0707	M	UDP-N-acetylglucosamine:LPSN-acetylglucosaminetransferase	Mureinebiosynthesis	MurG
AUO97_RS05740	COG0189	E	Glutathionesynthase,LysXorRimK-typeligase,ATP-graspsuperfamily	Lysinebiosynthesis	LysX
AUO97_RS05745	COG5515	S	Uncharacterizedconservedprotein,DUF1737domain
AUO97_RS05750	COG4774	P	Outermembranereceptorformonomericcatechols		Fiu
AUO97_RS05760	COG0461	F	Orotatephosphoribosyltransferase	Pyrimidinebiosynthesis	PyrE
AUO97_RS05765	COG0708	L	ExonucleaseIII		XthA
AUO97_RS05770	COG1393	P	Arsenatereductaseorrelatedprotein,glutaredoxinfamily		ArsC
AUO97_RS05775	COG4731	S	Uncharacterizedconservedprotein,DUF2147family
AUO97_RS05780	COG0657	I	Acetylesterase/lipase		Aes
AUO97_RS05785	COG2199	T	GGDEFdomain,diguanylatecyclase(c-di-GMPsynthetase)oritsenzymaticallyinactivevariants		GGDEF
AUO97_RS05790	COG4232	O	Thiol:disulfideinterchangeproteinDsbD		DsbD
AUO97_RS05795
AUO97_RS05800
AUO97_RS05805
AUO97_RS05810	COG0726	G	Peptidoglycan/xylan/chitindeacetylase,PgdA/NodB/CDA1family		CDA1
AUO97_RS05815	COG3195	F	2-oxo-4-hydroxy-4-carboxy--5-ureidoimidazoline(OHCU)decarboxylase(uricaciddegradation)		PucL
AUO97_RS05820	COG2351	F	5-hydroxyisouratehydrolase(purinecatabolism),transthyretin-relatedfamily		HiuH
AUO97_RS05820	COG2351	F	5-hydroxyisouratehydrolase(purinecatabolism),transthyretin-relatedfamily		HiuH
AUO97_RS05825	COG2233	F	Xanthine/uracilpermease	Pyrimidinedegradation	UraA
AUO97_RS05825	COG2233	F	Xanthine/uracilpermease	Pyrimidinedegradation	UraA
AUO97_RS05830	COG3248	M	Nucleoside-specificoutermembranechannelproteinTsx		Tsx
AUO97_RS05835	COG0654	H	2-polyprenyl-6-methoxyphenolhydroxylaseandrelatedFAD-dependentoxidoreductases	Ubiquinonebiosynthesis	UbiH
AUO97_RS05840	COG4266	F	Allantoicase		Alc
AUO97_RS05845	COG3194	F	Ureidoglycolatehydrolase(allantoindegradation)		AllA
AUO97_RS05850	COG0187	L	DNAgyrase/topoisomeraseIV,subunitB		GyrB
AUO97_RS05850	COG0187	L	DNAgyrase/topoisomeraseIV,subunitB		GyrB
AUO97_RS05855	COG3150	R	PredictedesteraseYcpF,UPF0227family		YcfP
AUO97_RS05860	COG1075	I	Triacylglycerolesterase/lipaseEstA,alpha/betahydrolasefold		EstA
AUO97_RS05930	COG0582	L	Integrase/recombinase,includesphageintegrase		FimB
AUO97_RS05935	COG3311	K	DNA-bindingtranscriptionalregulatorAlpA		AlpA
AUO97_RS05935	COG3311	K	DNA-bindingtranscriptionalregulatorAlpA		AlpA
AUO97_RS05940	COG3598	L	RecA-familyATPase		RepA
AUO97_RS05945
AUO97_RS05950	COG4691	V	PlasmidstabilityproteinStbC1,containsribbon-helix-helixdomain		StbC1
AUO97_RS05955	COG5314	X	Conjugaltransfer/entryexclusionprotein
AUO97_RS05960
AUO97_RS05965	COG3846	U	TypeIVsecretorypathway,TrbLcomponents		TrbL
AUO97_RS05970
AUO97_RS05975
AUO97_RS05980
AUO97_RS05985	COG0798	P	ArseniteeffluxpumpArsB,ACR3family		ACR3
AUO97_RS05990	COG0394	T	Protein-tyrosine-phosphatase		Wzb
AUO97_RS05995	COG0431	C	NAD(P)H-dependentFMNreductase		SsuE
AUO97_RS06000	COG0640	K	DNA-bindingtranscriptionalregulator,ArsRfamily		ArsR
AUO97_RS06005	COG1961	L	Site-specificDNArecombinaseSpoIVCA/DNAinvertasePinE		SpoIVCA
AUO97_RS06005	COG1961	L	Site-specificDNArecombinaseSpoIVCA/DNAinvertasePinE		SpoIVCA
AUO97_RS06010
AUO97_RS06015
AUO97_RS06025	COG1109	G	Phosphomannomutase		ManB
AUO97_RS06030	COG0294	H	Dihydropteroatesynthase	Folatebiosynthesis	FolP
AUO97_RS06160
AUO97_RS06175	COG1167	K	DNA-bindingtranscriptionalregulator,MocRfamily,containsanaminotransferasedomain	Lysinebiosynthesis	ARO8
AUO97_RS06180	COG0235	E	5-methylthioribulose/5-deoxyribulose/Fuculose1-phosphatealdolase(methioninesalvage,sugardegradation)	Ureacycle	AraD
AUO97_RS06185	COG0329	E	4-hydroxy-tetrahydrodipicolinatesynthase/N-acetylneuraminatelyase	Lysinebiosynthesis	DapA
AUO97_RS06190
AUO97_RS06195
AUO97_RS06200	COG0221	C	Inorganicpyrophosphatase		Ppa
AUO97_RS06205	COG3686	S	Uncharacterizedconservedprotein,MAPEGsuperfamily
AUO97_RS06210
AUO97_RS06215	COG0318	I	O-succinylbenzoicacid-CoAligaseMenEorrelatedacyl-CoAsynthetase(AMP-forming)	Menaquinonebiosynthesis	MenE/FadK
AUO97_RS06220	COG0188	L	DNAgyrase/topoisomeraseIV,subunitA		GyrA
AUO97_RS06225	COG2814	G	PredictedarabinoseeffluxpermeaseAraJ,MFSfamily		AraJ
AUO97_RS06230	COG2860	S	UncharacterizedmembraneproteinYeiH		YadS
AUO97_RS06235	COG3012	S	UncharacterizedconservedproteinYchJ,containsN-andC-terminalSEC-Cdomains		YchJ
AUO97_RS06240	COG4536	P	Mg2+andCo2+transporterCorB,containsDUF21,CBSpair,andCorC-HlyCdomains		CorB
AUO97_RS06245	COG1611	F	NucleotidemonophosphatenucleosidasePpnN/YdgH,LonelyGuy(LOG)family		PpnN
AUO97_RS06250	COG2814	G	PredictedarabinoseeffluxpermeaseAraJ,MFSfamily		AraJ
AUO97_RS06255	COG3757	M	LyzozymeM1(1,4-beta-N-acetylmuramidase),GH25family		Acm
AUO97_RS06260	COG0389	L	Nucleotidyltransferase/DNApolymeraseDinPinvolvedinDNArepair		DinP
AUO97_RS06265	COG0251	V	EnaminedeaminaseRidA,housecleaningofreactiveenamineintermediates,YjgF/YER057c/UK114family	Pyrimidinedegradation	RidA
AUO97_RS06270
AUO97_RS06275	COG1032	R	RadicalSAMsuperfamilyenzymeYgiQ,UPF0313family		YgiQ
AUO97_RS06280	COG4222	S	Uncharacterizedconservedprotein,containsaphytase-likedomain
AUO97_RS06285	COG0789	K	DNA-bindingtranscriptionalregulator,MerRfamily		SoxR
AUO97_RS06290
AUO97_RS06295	COG0655	C	MultimericflavodoxinWrbA,includesNAD(P)H:quinoneoxidoreductase		WrbA
AUO97_RS06300	COG0741	M	Solublelyticmureintransglycosylaseorregulatoryproteins(maycontainLysM/invasindomain)		MltE
AUO97_RS06305	COG0031	E	Cysteinesynthase	Cysteinebiosynthesis	CysK
AUO97_RS06310	COG4552	R	Predictedacetyltransferase		Eis
AUO97_RS06340	COG1309	K	DNA-bindingprotein,AcrRfamily,includesnucleoidocclusionproteinSlmA		AcrR
AUO97_RS06345
AUO97_RS06350
AUO97_RS06355	COG1629	P	Outermembranereceptorprotein,Fetransport		CirA
AUO97_RS06360
AUO97_RS06365	COG0242	J	Peptidedeformylase		Def
AUO97_RS06370	COG1652	P	Cytoplasmicpotassium-bindingproteinKbp/XkdP/YgaU,containsLysMdomain		XkdP
AUO97_RS06375	COG0758	L	PredictedRossmannfoldnucleotide-bindingproteinDprA/SmfinvolvedinDNAuptake		Smf
AUO97_RS06380	COG0009	J	tRNAA37threonylcarbamoyladenosinesynthetasesubunitTsaC/SUA5/YrdC	tRNAmodification	TsaC
AUO97_RS06385	COG0697	G	Permeaseofthedrug/metabolitetransporter(DMT)superfamily		RhaT
AUO97_RS06390	COG1309	K	DNA-bindingprotein,AcrRfamily,includesnucleoidocclusionproteinSlmA		AcrR
AUO97_RS06395	COG2814	G	PredictedarabinoseeffluxpermeaseAraJ,MFSfamily		AraJ
AUO97_RS06400	COG2207	K	AraC-typeDNA-bindingdomainandAraC-containingproteins		AraC
AUO97_RS06405	COG0386	V	Thioredoxin/glutathioneperoxidaseBtuE,reduceslipidperoxides		BtuE
AUO97_RS06410
AUO97_RS06420	COG0355	C	FoF1-typeATPsynthase,epsilonsubunit	FoF1-typeATPsynthase	AtpC
AUO97_RS06425	COG0055	C	FoF1-typeATPsynthase,betasubunit	FoF1-typeATPsynthase	AtpD
AUO97_RS06430	COG0224	C	FoF1-typeATPsynthase,gammasubunit	FoF1-typeATPsynthase	AtpG
AUO97_RS06435	COG0056	C	FoF1-typeATPsynthase,alphasubunit	FoF1-typeATPsynthase	AtpA
AUO97_RS06440	COG0712	C	FoF1-typeATPsynthase,deltasubunit	FoF1-typeATPsynthase	AtpH
AUO97_RS06445	COG0711	C	FoF1-typeATPsynthase,membranesubunitborb'	FoF1-typeATPsynthase	AtpF
AUO97_RS06450	COG0636	C	FoF1-typeATPsynthase,membranesubunitc/Archaeal/vacuolar-typeH+-ATPase,subunitK	FoF1-typeATPsynthase	AtpE
AUO97_RS06455	COG0356	C	FoF1-typeATPsynthase,membranesubunita	FoF1-typeATPsynthase	AtpB
AUO97_RS06460	COG3312	C	FoF1-typeATPsynthaseaccessoryproteinAtpI	FoF1-typeATPsynthase	AtpI
AUO97_RS06465	COG4531	P	ABC-typeZn2+transportsystem,periplasmiccomponent/surfaceadhesinZnuA		ZnuA
AUO97_RS06470	COG0735	P	Fe2+orZn2+uptakeregulationproteinFur/Zur		Fur
AUO97_RS06475	COG1121	P	ABC-typeMn2+/Zn2+transportsystem,ATPasecomponent		ZnuC
AUO97_RS06480	COG1108	P	ABC-typeMn2+/Zn2+transportsystem,permeasecomponent		ZnuB
AUO97_RS06480	COG1108	P	ABC-typeMn2+/Zn2+transportsystem,permeasecomponent		ZnuB
AUO97_RS06485	COG1280	E	Threonine/homoserine/homoserinelactoneeffluxprotein		RhtB
AUO97_RS06490	COG2837	P	Periplasmicdeferrochelatase/peroxidaseEfeB		EfeB
AUO97_RS06495	COG0281	C	Malicenzyme	Ureacycle	SfcA
AUO97_RS06495	COG0281	C	Malicenzyme	Ureacycle	SfcA
AUO97_RS06500	COG0018	J	Arginyl-tRNAsynthetase	Aminoacyl-tRNAsynthetases	ArgS
AUO97_RS06505	COG3087	D	CelldivisionproteinFtsN		FtsN
AUO97_RS06510	COG0625	O	GlutathioneS-transferase		GstA
AUO97_RS06515	COG1765	R	UncharacterizedOsmC-relatedprotein		YhfA
AUO97_RS06520	COG1741	R	Redox-sensitivebicupinYhaK,pirinsuperfamily		YhaK
AUO97_RS06525
AUO97_RS06530	COG1695	K	DNA-bindingtranscriptionalregulator,PadRfamily		PadR
AUO97_RS06535
AUO97_RS06540	COG0519	F	GMPsynthase,PP-ATPasedomain/subunit	Purinebiosynthesis	GuaA2
AUO97_RS06545	COG4399	S	UncharacterizedmembraneproteinYheB,UPF0754family		YheB
AUO97_RS06550	COG2259	S	UncharacterizedmembraneproteinYphA,DoxX/SURF4family		DoxX
AUO97_RS06555	COG0586	M	MembraneintegrityproteinDedA,putativetransporter,DedA/Tvp38family		DedA
AUO97_RS06560	COG1280	E	Threonine/homoserine/homoserinelactoneeffluxprotein		RhtB
AUO97_RS06565
AUO97_RS06570	COG1192	D	ParA-likeATPaseinvolvedinchromosome/plasmidpartitioningorcellulosebiosynthesisproteinBcsQ		ParA
AUO97_RS06575
AUO97_RS06580	COG0271	K	DNA-bindingglobaltranscriptionalregulatorBolA,affectscellshape,celldivisionandbiofilmformation		BolA
AUO97_RS06595	COG2091	H	Phosphopantetheinyltransferase		Sfp
AUO97_RS06600	COG0596	H	2-succinyl-6-hydroxy-2,4-cyclohexadiene-1-carboxylatesynthaseMenHandrelatedesterases,alpha/betahydrolasefold	Menaquinonebiosynthesis	MenH
AUO97_RS06600	COG0596	H	2-succinyl-6-hydroxy-2,4-cyclohexadiene-1-carboxylatesynthaseMenHandrelatedesterases,alpha/betahydrolasefold	Menaquinonebiosynthesis	MenH
AUO97_RS06605
AUO97_RS06610	COG2867	J	RibosomeassociationtoxinPasT(RatA)oftheRatABtoxin-antitoxinmodule		PasT
AUO97_RS06615	COG3319	Q	ThioesterasedomainoftypeIpolyketidesynthaseornon-ribosomalpeptidesynthetase		EntF2
AUO97_RS06615	COG3319	Q	ThioesterasedomainoftypeIpolyketidesynthaseornon-ribosomalpeptidesynthetase		EntF2
AUO97_RS06620	COG0236	I	Acylcarrierprotein	Fattyacidbiosynthesis	AcpP
AUO97_RS06625	COG1960	I	Acyl-CoAdehydrogenaserelatedtothealkylationresponseproteinAidB	Fattyacidbiosynthesis	CaiA
AUO97_RS06630	COG0318	I	O-succinylbenzoicacid-CoAligaseMenEorrelatedacyl-CoAsynthetase(AMP-forming)	Menaquinonebiosynthesis	MenE/FadK
AUO97_RS06630	COG0318	I	O-succinylbenzoicacid-CoAligaseMenEorrelatedacyl-CoAsynthetase(AMP-forming)	Menaquinonebiosynthesis	MenE/FadK
AUO97_RS06635	COG2197	T	DNA-bindingresponseregulator,NarL/FixJfamily,containsRECandHTHdomains		CitB
AUO97_RS06640
AUO97_RS06645	COG3916	T	N-acyl-homoserinelactonesynthaseLasI(autoinducerbiosynthesis)		LasI
AUO97_RS06650	COG2223	P	Nitrate/nitritetransporterNarK		NarK
AUO97_RS06655	COG1024	I	Enoyl-CoAhydratase/carnithineracemase	Fattyacidbiosynthesis	CaiD
AUO97_RS06660	COG1024	I	Enoyl-CoAhydratase/carnithineracemase	Fattyacidbiosynthesis	CaiD
AUO97_RS06665	COG1960	I	Acyl-CoAdehydrogenaserelatedtothealkylationresponseproteinAidB	Fattyacidbiosynthesis	CaiA
AUO97_RS06665	COG1960	I	Acyl-CoAdehydrogenaserelatedtothealkylationresponseproteinAidB	Fattyacidbiosynthesis	CaiA
AUO97_RS06670	COG0365	I	Acyl-coenzymeAsynthetase/AMP-(fatty)acidligase		Acs
AUO97_RS06670	COG0365	I	Acyl-coenzymeAsynthetase/AMP-(fatty)acidligase		Acs
AUO97_RS06675	COG2084	I	3-hydroxyisobutyratedehydrogenaseorrelatedbeta-hydroxyaciddehydrogenase		MmsB
AUO97_RS06680	COG1012	I	Acyl-CoAreductaseorotherNAD-dependentaldehydedehydrogenase	Prolinedegradation	AdhE
AUO97_RS06685	COG0583	K	DNA-bindingtranscriptionalregulator,LysRfamily		LysR
AUO97_RS06690	COG1113	E	L-asparaginetransporterorrelatedpermease		AnsP
AUO97_RS06695	COG1113	E	L-asparaginetransporterorrelatedpermease		AnsP
AUO97_RS06700	COG0251	V	EnaminedeaminaseRidA,housecleaningofreactiveenamineintermediates,YjgF/YER057c/UK114family	Pyrimidinedegradation	RidA
AUO97_RS06705	COG0787	M	Alanineracemase	Mureinebiosynthesis	Alr
AUO97_RS06710	COG0665	E	Glycine/D-aminoacidoxidase(deaminating)		DadA
AUO97_RS06710	COG0665	E	Glycine/D-aminoacidoxidase(deaminating)		DadA
AUO97_RS06715	COG1522	K	DNA-bindingtranscriptionalregulator,Lrpfamily		Lrp
AUO97_RS06720	COG3503	S	Uncharacterizedmembraneprotein,DUF1624family
AUO97_RS06725	COG4774	P	Outermembranereceptorformonomericcatechols		Fiu
AUO97_RS06730	COG4922	R	PredictedSnoaL-likealdolcondensation-catalyzingenzyme
AUO97_RS06735
AUO97_RS06740	COG0564	J	PseudouridinesynthaseRluA,23SrRNA-ortRNA-specific	23SrRNAmodification	RluA
AUO97_RS06745	COG4420	S	Uncharacterizedmembraneprotein
AUO97_RS06750	COG0300	R	Short-chaindehydrogenase		YqjQ
AUO97_RS06770
AUO97_RS06780	COG4253	S	Uncharacterizedconservedprotein,DUF2345family
AUO97_RS06780	COG4253	S	Uncharacterizedconservedprotein,DUF2345family
AUO97_RS06785	COG0790	R	TPRrepeat		TPR
AUO97_RS06785	COG0790	R	TPRrepeat		TPR
AUO97_RS06785	COG0790	R	TPRrepeat		TPR
AUO97_RS06785	COG0790	R	TPRrepeat		TPR
AUO97_RS06790	COG0304	I	3-oxoacyl-(acyl-carrier-protein)synthase	Fattyacidbiosynthesis	FabB
AUO97_RS06790	COG0304	I	3-oxoacyl-(acyl-carrier-protein)synthase	Fattyacidbiosynthesis	FabB
AUO97_RS06800
AUO97_RS06810
AUO97_RS06815
AUO97_RS06825	COG1048	C	AconitaseA	LysinebiosynthesisTCAcycle	AcnA
AUO97_RS06830	COG0372	C	Citratesynthase	TCAcycle	GltA
AUO97_RS06835	COG2513	G	2-Methylisocitratelyaseandrelatedenzymes,PEPmutasefamily		PrpB
AUO97_RS06840	COG1802	K	DNA-bindingtranscriptionalregulator,GntRfamily		GntR
AUO97_RS06845	COG1448	E	Aspartate/aromaticaminotransferase	Isoleucine,leucine,valinebiosynthesis	TyrB
AUO97_RS06850	COG0277	C	FAD/FMN-containinglactatedehydrogenase/glycolateoxidase		GlcD
AUO97_RS06855	COG1304	C	FMN-dependentdehydrogenase,includesL-lactatedehydrogenaseandtypeIIisopentenyldiphosphateisomerase	Isoprenoidbiosynthesis	LldD
AUO97_RS06860	COG2186	K	DNA-bindingtranscriptionalregulator,FadRfamily		FadR
AUO97_RS06865	COG1620	C	L-lactatepermease		LldP
AUO97_RS06870	COG1109	G	Phosphomannomutase		ManB
AUO97_RS06875	COG1087	M	UDP-glucose4-epimerase		GalE
AUO97_RS06880	COG0166	G	Glucose-6-phosphateisomerase	Glycolysis	Pgi
AUO97_RS06885	COG1004	M	UDP-glucose6-dehydrogenase		Ugd
AUO97_RS06890	COG1210	M	UTP-glucose-1-phosphateuridylyltransferase		GalU
AUO97_RS06895	COG2148	M	SugartransferaseinvolvedinLPSbiosynthesis(colanic,teichoicacid)		WcaJ
AUO97_RS06900	COG1215	N	Glycosyltransferase,catalyticsubunitofcellulosesynthaseandpoly-beta-1,6-N-acetylglucosaminesynthase		BcsA
AUO97_RS06905	COG0438	M	Glycosyltransferaseinvolvedincellwallbisynthesis		RfaB
AUO97_RS06910
AUO97_RS06915	COG0438	M	Glycosyltransferaseinvolvedincellwallbisynthesis		RfaB
AUO97_RS06920	COG0438	M	Glycosyltransferaseinvolvedincellwallbisynthesis		RfaB
AUO97_RS06925	COG0110	R	Acetyltransferase,isoleucinepatchsuperfamily		WbbJ
AUO97_RS06930	COG2244	M	MembraneproteininvolvedintheexportofO-antigenandteichoicacid		RfbX
AUO97_RS06935	COG0399	M	dTDP-4-amino-4,6-dideoxygalactosetransaminase		WecE
AUO97_RS06940	COG1045	E	Serineacetyltransferase	Cysteinebiosynthesis	CysE
AUO97_RS06945	COG0673	R	Predicteddehydrogenase		MviM
AUO97_RS06950	COG0677	M	UDP-N-acetyl-D-mannosaminuronatedehydrogenase		WecC
AUO97_RS06955	COG1596	M	PeriplasmicproteinWzainvolvedinpolysaccharideexport,containsSLBBdomainofthebeta-graspfold		Wza
AUO97_RS06960	COG0394	T	Protein-tyrosine-phosphatase		Wzb
AUO97_RS06965	COG3206	M	Exopolysaccharideexportprotein/domainGumC/Wzc1		GumC
AUO97_RS06965	COG3206	M	Exopolysaccharideexportprotein/domainGumC/Wzc1		GumC
AUO97_RS06970	COG0545	O	FKBP-typepeptidyl-prolylcis-transisomerase		FkpA
AUO97_RS06975	COG0545	O	FKBP-typepeptidyl-prolylcis-transisomerase		FkpA
AUO97_RS06980	COG0728	M	LipidIIflippaseMurJ/MviN(peptidoglycanbiosynthesis)		MurJ
AUO97_RS06985	COG3023	M	N-acetyl-anhydromuramyl-L-alanineamidaseAmpD		AmpD
AUO97_RS06990	COG0157	H	Nicotinate-nucleotidepyrophosphorylase	NADbiosynthesis	NadC
AUO97_RS06995	COG3511	M	PhospholipaseC		PlcC
AUO97_RS07000	COG0689	J	RibonucleasePH		Rph
AUO97_RS07005	COG3239	I	Fattyaciddesaturase		DesA
AUO97_RS07010	COG1018	C	Flavodoxin/ferredoxin--NADPreductase		Fpr
AUO97_RS07015	COG1309	K	DNA-bindingprotein,AcrRfamily,includesnucleoidocclusionproteinSlmA		AcrR
AUO97_RS07020	COG1309	K	DNA-bindingprotein,AcrRfamily,includesnucleoidocclusionproteinSlmA		AcrR
AUO97_RS07025	COG2761	O	Predicteddithiol-disulfideisomerase,DsbA/YjbHfamily(virulence,stressresistance)		FrnE
AUO97_RS07030	COG2227	H	2-polyprenyl-3-methyl-5-hydroxy-6-metoxy-1,4-benzoquinolmethylase	Ubiquinonebiosynthesis	UbiG
AUO97_RS07035	COG0546	C	Phosphoglycolatephosphatase,HADsuperfamily		Gph
AUO97_RS07040	COG1028	I	NAD(P)-dependentdehydrogenase,short-chainalcoholdehydrogenasefamily	Fattyacidbiosynthesis	FabG
AUO97_RS07045	COG5455	P	PeriplasmicregulatorRcnBofNiandCoefflux		RcnB
AUO97_RS07050	COG5455	P	PeriplasmicregulatorRcnBofNiandCoefflux		RcnB
AUO97_RS07055	COG1246	E	N-acetylglutamatesynthaseorrelatedacetyltransferase,GNATfamily	Argininebiosynthesis	ArgA
AUO97_RS07060	COG0715	P	ABC-typenitrate/sulfonate/bicarbonatetransportsystem,periplasmiccomponent		TauA
AUO97_RS07065	COG0715	P	ABC-typenitrate/sulfonate/bicarbonatetransportsystem,periplasmiccomponent		TauA
AUO97_RS07070	COG2141	H	Flavin-dependentoxidoreductase,luciferasefamily(includesalkanesulfonatemonooxygenaseSsuDandmethylenetetrahydromethanopterinreductase)	Pyrimidinedegradation	SsuD
AUO97_RS07075	COG0600	P	ABC-typenitrate/sulfonate/bicarbonatetransportsystem,permeasecomponent		TauC
AUO97_RS07075	COG0600	P	ABC-typenitrate/sulfonate/bicarbonatetransportsystem,permeasecomponent		TauC
AUO97_RS07080	COG1116	P	ABC-typenitrate/sulfonate/bicarbonatetransportsystem,ATPasecomponent		TauB
AUO97_RS07085	COG1309	K	DNA-bindingprotein,AcrRfamily,includesnucleoidocclusionproteinSlmA		AcrR
AUO97_RS07090	COG0775	F	Nucleosidephosphorylase/nucleosidase,includes5'-methylthioadenosine/S-adenosylhomocysteinenucleosidaseMtnNandfutalosinehydrolaseMqnB	Menaquinonebiosynthesis	MtnN
AUO97_RS07095	COG1275	V	TelluriteresistanceproteinTehAandrelatedpermeases		TehA
AUO97_RS07100	COG0196	H	FADsynthase	Riboflavin/FADbiosynthesis	RibF
AUO97_RS07105	COG0060	J	Isoleucyl-tRNAsynthetase	Aminoacyl-tRNAsynthetases	IleS
AUO97_RS07110	COG0597	M	Lipoproteinsignalpeptidase		LspA
AUO97_RS07110	COG0597	M	Lipoproteinsignalpeptidase		LspA
AUO97_RS07115	COG1047	O	Peptidyl-prolylcis-transisomerase,FKBPtype		SlpA
AUO97_RS07120	COG0431	C	NAD(P)H-dependentFMNreductase		SsuE
AUO97_RS07125	COG0666	T	Ankyrinrepeat		ANKYR
AUO97_RS07155	COG0652	O	Peptidyl-prolylcis-transisomerase(rotamase)-cyclophilinfamily		PpiB
AUO97_RS07160	COG0657	I	Acetylesterase/lipase		Aes
AUO97_RS07160	COG0657	I	Acetylesterase/lipase		Aes
AUO97_RS07165
AUO97_RS07170
AUO97_RS07175	COG0491	R	Glyoxylaseorarelatedmetal-dependenthydrolase,beta-lactamasesuperfamilyII		GloB
AUO97_RS07185	COG0576	O	MolecularchaperoneGrpE(heatshockproteinHSP-70)		GrpE
AUO97_RS07190	COG0443	O	MolecularchaperoneDnaK(HSP70)		DnaK
AUO97_RS07195
AUO97_RS07200
AUO97_RS07205
AUO97_RS07210	COG2951	M	Membrane-boundlyticmureintransglycosylaseB		MltB
AUO97_RS07215	COG0026	F	Phosphoribosylaminoimidazolecarboxylase(NCAIRsynthetase)	Purinebiosynthesis	PurK
AUO97_RS07220	COG0041	F	Phosphoribosylcarboxyaminoimidazole(NCAIR)mutase	Purinebiosynthesis	PurE
AUO97_RS07230	COG3169	S	Uncharacterizedmembraneprotein,DMT/DUF486family
AUO97_RS07235	COG0773	M	UDP-N-acetylmuramate-alanineligaseMurCandrelatedligases,MurC/Mplfamily	Mureinebiosynthesis	MurC
AUO97_RS07240	COG4292	S	LowtemperaturerequirementproteinLtrA(functionunknown)		LtrA
AUO97_RS07245
AUO97_RS07250	COG0861	P	TelluriteresistancemembraneproteinTerC		TerC
AUO97_RS07255
AUO97_RS07260	COG0754	E	Glutathionylspermidinesynthase,CHAPdomain		Gsp
AUO97_RS07265	COG4638	P	Phenylpropionatedioxygenaseorrelatedring-hydroxylatingdioxygenase,largeterminalsubunit		HcaE
AUO97_RS07270	COG0402	F	Cytosine/adenosinedeaminaseorrelatedmetal-dependenthydrolase	Pyrimidinesalvage	SsnA
AUO97_RS07275	COG0634	F	Hypoxanthine-guaninephosphoribosyltransferase	Purinesalvage	HptA
AUO97_RS07280	COG2261	R	UncharacterizedmembraneproteinYeaQ/YmgE,transglycosylase-associatedproteinfamily		YeaQ
AUO97_RS07285	COG1651	O	Proteinthiol-disulfideisomeraseDsbC		DsbG
AUO97_RS07290	COG1230	P	Co/Zn/Cdeffluxsystemcomponent		CzcD
AUO97_RS07295	COG1937	K	DNA-bindingtranscriptionalregulator,FrmRfamily		FrmR
AUO97_RS07300	COG0486	J	tRNAU345-carboxymethylaminomethylmodifyingGTPaseMnmE/TrmE	tRNAmodification	MnmE
AUO97_RS07305	COG0706	M	MembraneproteininsertaseOxa1/YidC/SpoIIIJ		YidC
AUO97_RS07310	COG0759	M	Membrane-anchoredproteinYidD,putatitvecomponentofmembraneproteininsertaseOxa1/YidC/SpoIIIJ		YidD
AUO97_RS07315	COG0594	J	RNasePproteincomponent		RnpA
AUO97_RS07320	COG0230	J	RibosomalproteinL34	Ribosome50Ssubunit	RpmH
AUO97_RS07325	COG0593	L	ChromosomalreplicationinitiationATPaseDnaA		DnaA
AUO97_RS07325	COG0593	L	ChromosomalreplicationinitiationATPaseDnaA		DnaA
AUO97_RS07325	COG0593	L	ChromosomalreplicationinitiationATPaseDnaA		DnaA
AUO97_RS07330	COG0592	L	DNApolymeraseIIIslidingclamp(beta)subunit,PCNAhomolog		DnaN
AUO97_RS07335	COG1195	L	RecombinationalDNArepairATPaseRecF		RecF
AUO97_RS07335	COG1195	L	RecombinationalDNArepairATPaseRecF		RecF
AUO97_RS07340	COG0187	L	DNAgyrase/topoisomeraseIV,subunitB		GyrB
AUO97_RS07345	COG3783	C	Solublecytochromeb562		CybC
AUO97_RS07350	COG0586	M	MembraneintegrityproteinDedA,putativetransporter,DedA/Tvp38family		DedA
AUO97_RS07355	COG0488	R	ATPasecomponentsofABCtransporterswithduplicatedATPasedomains		Uup
AUO97_RS07355	COG0488	R	ATPasecomponentsofABCtransporterswithduplicatedATPasedomains		Uup
AUO97_RS07360
AUO97_RS07365
AUO97_RS07370	COG1638	G	TRAP-typeC4-dicarboxylatetransportsystem,periplasmiccomponent		DctP
AUO97_RS07375	COG0316	O	Fe-Sclusterassemblyiron-bindingproteinIscA		IscA
AUO97_RS07380	COG0596	H	2-succinyl-6-hydroxy-2,4-cyclohexadiene-1-carboxylatesynthaseMenHandrelatedesterases,alpha/betahydrolasefold	Menaquinonebiosynthesis	MenH
AUO97_RS07385	COG2377	M	1,6-Anhydro-N-acetylmuramatekinase		AnmK
AUO97_RS07390	COG0162	J	Tyrosyl-tRNAsynthetase	Aminoacyl-tRNAsynthetases	TyrS
AUO97_RS07390	COG0162	J	Tyrosyl-tRNAsynthetase	Aminoacyl-tRNAsynthetases	TyrS
AUO97_RS07420	COG0625	O	GlutathioneS-transferase		GstA
AUO97_RS07425
AUO97_RS07430	COG0733	R	Na+-dependenttransporter,SNFfamily		YocR
AUO97_RS07435
AUO97_RS07440	COG0144	J	16SrRNAC967orC1407C5-methylase,RsmB/RsmFfamily	16SrRNAmodification	RsmB
AUO97_RS07445	COG0223	J	Methionyl-tRNAformyltransferase		Fmt
AUO97_RS07450	COG0129	E	Dihydroxyaciddehydratase/phosphogluconatedehydratase	Isoleucine,leucine,valinebiosynthesis	IlvD
AUO97_RS07455
AUO97_RS07460
AUO97_RS07465	COG0583	K	DNA-bindingtranscriptionalregulator,LysRfamily		LysR
AUO97_RS07465	COG0583	K	DNA-bindingtranscriptionalregulator,LysRfamily		LysR
AUO97_RS07465	COG0583	K	DNA-bindingtranscriptionalregulator,LysRfamily		LysR
AUO97_RS07470	COG2233	F	Xanthine/uracilpermease	Pyrimidinedegradation	UraA
AUO97_RS07475	COG2352	C	Phosphoenolpyruvatecarboxylase	Ureacycle	Ppc
AUO97_RS07480	COG1309	K	DNA-bindingprotein,AcrRfamily,includesnucleoidocclusionproteinSlmA		AcrR
AUO97_RS07485	COG0845	M	MultidrugeffluxpumpsubunitAcrA(membrane-fusionprotein)		AcrA
AUO97_RS07490	COG0841	V	MultidrugeffluxpumpsubunitAcrB		AcrB
AUO97_RS07495
AUO97_RS07500	COG0484	O	DnaJ-classmolecularchaperonewithC-terminalZnfingerdomain		DnaJ
AUO97_RS07505
AUO97_RS07510	COG0289	E	4-hydroxy-tetrahydrodipicolinatereductase	Lysinebiosynthesis	DapB
AUO97_RS07515
AUO97_RS07520	COG2814	G	PredictedarabinoseeffluxpermeaseAraJ,MFSfamily		AraJ
AUO97_RS07525	COG0656	Q	Aldo/ketoreductase,relatedtodiketogulonatereductase		ARA1
AUO97_RS07530	COG0583	K	DNA-bindingtranscriptionalregulator,LysRfamily		LysR
AUO97_RS07535
AUO97_RS07540	COG1167	K	DNA-bindingtranscriptionalregulator,MocRfamily,containsanaminotransferasedomain	Lysinebiosynthesis	ARO8
AUO97_RS07545	COG1064	G	D-arabinose1-dehydrogenase,Zn-dependentalcoholdehydrogenasefamily		AdhP
AUO97_RS07550	COG2818	L	3-methyladenineDNAglycosylaseTag		Tag
AUO97_RS07555
AUO97_RS07560	COG0739	M	MureinDD-endopeptidaseMepMandmureinhydrolaseactivatorNlpD,containsLysMdomain		NlpD
AUO97_RS07565	COG1194	L	Adenine-specificDNAglycosylase,actsonAGandA-oxoGpairs		MutY
AUO97_RS07570	COG0537	F	Purinenucleosidephosphoramidase/Ap4Ahydrolase,histidinetriade(HIT)family		HinT
AUO97_RS07575	COG0412	Q	Dienelactonehydrolase		DLH
AUO97_RS07580	COG5487	S	UncharacterizedmembraneproteinYtjA,UPF0391family		YtjA
AUO97_RS07585	COG2983	R	UncharacterizedcysteineclusterproteinYcgN,CxxCxxCCfamily		YcgN
AUO97_RS07590	COG2133	G	Glucose/arabinosedehydrogenase,beta-propellerfold		YliI
AUO97_RS07595	COG2256	L	Replication-associatedrecombinationproteinRarA(DNA-dependentATPase)		RarA
AUO97_RS07600	COG2116	P	Formate/nitritetransporterFocA,FNTfamily		FocA
AUO97_RS07605
AUO97_RS07610	COG0152	F	Phosphoribosylaminoimidazole-succinocarboxamidesynthase	Purinebiosynthesis	PurC
AUO97_RS07615
AUO97_RS07620	COG0329	E	4-hydroxy-tetrahydrodipicolinatesynthase/N-acetylneuraminatelyase	Lysinebiosynthesis	DapA
AUO97_RS07625	COG1335	H	Nicotinamidase-relatedamidase	Pyrimidinedegradation	PncA
AUO97_RS07630	COG0385	R	PredictedNa+-dependenttransporterYfeH		YfeH
AUO97_RS07640	COG1683	S	UncharacterizedconservedproteinYbbK,DUF523family		YbbK
AUO97_RS07645	COG3185	E	4-hydroxyphenylpyruvatedioxygenaseandrelatedhemolysins		HppD
AUO97_RS07650	COG1414	K	DNA-bindingtranscriptionalregulator,IclRfamily		IclR
AUO97_RS07650	COG1414	K	DNA-bindingtranscriptionalregulator,IclRfamily		IclR
AUO97_RS07655	COG0346	Q	Catechol2,3-dioxygenaseorrelatedenzyme,vicinaloxygenchelate(VOC)family		GloA
AUO97_RS07660	COG0625	O	GlutathioneS-transferase		GstA
AUO97_RS07665	COG0179	Q	2-keto-4-pentenoatehydratase/2-oxohepta-3-ene-1,7-dioicacidhydratase(catecholpathway)		YcgM
AUO97_RS07670	COG1113	E	L-asparaginetransporterorrelatedpermease		AnsP
AUO97_RS07675	COG3108	S	UncharacterizedconservedproteinYcbK,DUF882family		YcbK
AUO97_RS07680	COG0523	R	ZincmetallochaperoneYeiR/ZagAandrelatedGTPases,G3Efamily		YejR
AUO97_RS07685	COG1835	M	Peptidoglycan/LPSO-acetylaseOafA/YrhL,containsacyltransferaseandSGNH-hydrolasedomains		OafA
AUO97_RS07690	COG2188	K	DNA-bindingtranscriptionalregulator,GntRfamily		MngR
AUO97_RS07695	COG3758	S	Variousenvironmentalstresses-inducedproteinVes(functionunknown)		Ves
AUO97_RS07700	COG2987	E	Urocanatehydratase		HutU
AUO97_RS07705	COG2986	E	Histidineammonia-lyase		HutH
AUO97_RS07710	COG1113	E	L-asparaginetransporterorrelatedpermease		AnsP
AUO97_RS07715	COG1228	Q	Imidazolonepropionaseorrelatedamidohydrolase		HutI
AUO97_RS07720	COG0010	E	Arginase/agmatinasefamilyenzyme	Ureacycle	SpeB
AUO97_RS07725	COG4805	S	Uncharacterizedconservedprotein,DUF885family
AUO97_RS07725	COG4805	S	Uncharacterizedconservedprotein,DUF885family
AUO97_RS07730	COG0546	C	Phosphoglycolatephosphatase,HADsuperfamily		Gph
AUO97_RS07735	COG0796	M	Glutamateracemase	Mureinebiosynthesis	MurI
AUO97_RS07745
AUO97_RS07760	COG0449	M	Glucosamine6-phosphatesynthetase,containsamidotransferaseandphosphosugarisomerasedomains		GlmS
AUO97_RS07765	COG1207	M	BifunctionalproteinGlmU,N-acetylglucosamine-1-phosphate-uridyltransferase/glucosamine-1-phosphate-acetyltransferase		GlmU
AUO97_RS07770	COG1267	I	PhosphatidylglycerophosphataseA	Phospholipidbiosynthesis	PgpA
AUO97_RS07775	COG0611	H	Thiaminemonophosphatekinase	Thiaminebiosynthesis	ThiL
AUO97_RS07780	COG0781	K	TranscriptionantiterminationproteinNusB		NusB
AUO97_RS07785	COG0054	H	6,7-dimethyl-8-ribityllumazinesynthase(Riboflavinsynthasebetachain)	Riboflavin/FADbiosynthesis	RibE
AUO97_RS07790	COG0807	H	GTPcyclohydrolaseII	Riboflavin/FADbiosynthesis	RibA
AUO97_RS07795
AUO97_RS07800	COG3830	T	ACTdomain,bindsaminoacidsandothersmallligands		ACT
AUO97_RS07800	COG3830	T	ACTdomain,bindsaminoacidsandothersmallligands		ACT
AUO97_RS07800	COG3830	T	ACTdomain,bindsaminoacidsandothersmallligands		ACT
AUO97_RS07810
AUO97_RS07815
AUO97_RS07820	COG1490	J	D-aminoacyl-tRNAdeacylase		Dtd
AUO97_RS07825	COG0753	P	Catalase		KatE
AUO97_RS07825	COG0753	P	Catalase		KatE
AUO97_RS07830	COG0666	T	Ankyrinrepeat		ANKYR
AUO97_RS07835	COG1488	H	Nicotinicacidphosphoribosyltransferase	NADbiosynthesis	PncB
AUO97_RS07840	COG2897	P	3-mercaptopyruvatesulfurtransferaseSseA,containstworhodanesedomains		SseA
AUO97_RS07845	COG0688	I	Phosphatidylserinedecarboxylase	Phospholipidbiosynthesis	Psd
AUO97_RS07850	COG1506	E	Dipeptidylaminopeptidase/acylaminoacylpeptidase		DAP2
AUO97_RS07855	COG5002	T	SensorhistidinekinaseWalK		WalK
AUO97_RS07860	COG0745	T	DNA-bindingresponseregulator,OmpRfamily,containsRECandwinged-helix(wHTH)domain		OmpR
AUO97_RS07865	COG1309	K	DNA-bindingprotein,AcrRfamily,includesnucleoidocclusionproteinSlmA		AcrR
AUO97_RS07870	COG0300	R	Short-chaindehydrogenase		YqjQ
AUO97_RS07875	COG0534	V	Na+-drivenmultidrugeffluxpump,DinF/NorM/MATEfamily		NorM
AUO97_RS07880	COG0436	E	Aspartate/methionine/tyrosineaminotransferase	Isoleucine,leucine,valinebiosynthesis	AspB
AUO97_RS07885	COG2733	S	Uncharacterizedmembrane-anchoredproteinYjiN,DUF445family		YjiN
AUO97_RS07890
AUO97_RS07895	COG3803	S	Uncharacterizedconservedprotein,DUF924family
AUO97_RS07900	COG2918	H	Gamma-glutamylcysteinesynthetase		GshA
AUO97_RS07905	COG1495	O	DisulfidebondformationproteinDsbB		DsbB
AUO97_RS08025	COG4643	X	Uncharacterizeddomainassociatedwithphage/plasmidprimase
AUO97_RS08190
AUO97_RS08285
AUO97_RS08330
AUO97_RS08330
AUO97_RS08370	COG4123	J	tRNA1(Val)A37N6-methylaseTrmN6	tRNAmodification	TrmN6
AUO97_RS08405
AUO97_RS08435
AUO97_RS08450	COG1309	K	DNA-bindingprotein,AcrRfamily,includesnucleoidocclusionproteinSlmA		AcrR
AUO97_RS08460	COG4783	M	Outermembraneproteinchaperone/metalloproteaseBepA/YfgC,containsM48andTPRdomains		BepA
AUO97_RS08535	COG0606	O	PredictedMg-chelatase,containsChlI-likeandATPasedomains,YifBfamily		YifB
AUO97_RS08540
AUO97_RS08545	COG0347	T	NitrogenregulatoryproteinPII		GlnK
AUO97_RS08550	COG0004	P	AmmoniachannelproteinAmtB		AmtB
AUO97_RS08555	COG1327	K	TranscriptionalregulatorNrdR,containsZn-ribbonandATP-conedomains		NrdR
AUO97_RS08560	COG1985	H	Pyrimidinereductase,riboflavinbiosynthesis	Riboflavin/FADbiosynthesis	RibD
AUO97_RS08565	COG3392	L	Adenine-specificDNAmethylase
AUO97_RS08570	COG0307	H	Riboflavinsynthasealphachain	Riboflavin/FADbiosynthesis	RibC
AUO97_RS08575
AUO97_RS08580
AUO97_RS08585	COG2927	L	DNApolymeraseIII,chisubunit		HolC
AUO97_RS08590	COG0260	E	Leucylaminopeptidase		PepB
AUO97_RS08595	COG0795	M	LipopolysaccharideexportLptBFGCsystem,permeaseproteinLptF		LptF
AUO97_RS08600	COG0795	M	LipopolysaccharideexportLptBFGCsystem,permeaseproteinLptF		LptF
AUO97_RS08605	COG0696	G	Phosphoglyceratemutase(BPG-independent),AlkPsuperfamily	Glycolysis	GpmI
AUO97_RS08610	COG0793	O	C-terminalprocessingproteaseCtpA/Prc,containsaPDZdomain		CtpA
AUO97_RS08615	COG2204	T	DNA-bindingtranscriptionalresponseregulator,NtrCfamily,containsREC,AAA-typeATPase,andaFis-typeDNA-bindingdomains		AtoC
AUO97_RS08620	COG0642	T	Signaltransductionhistidinekinase		BaeS
AUO97_RS08625	COG2197	T	DNA-bindingresponseregulator,NarL/FixJfamily,containsRECandHTHdomains		CitB
AUO97_RS08630	COG1686	M	D-alanyl-D-alaninecarboxypeptidase		DacC
AUO97_RS08635	COG0498	E	Threoninesynthase	Threoninebiosynthesis	ThrC
AUO97_RS08640	COG0460	E	Homoserinedehydrogenase	Methioninebiosynthesis	ThrA
AUO97_RS08645	COG1651	O	Proteinthiol-disulfideisomeraseDsbC		DsbG
AUO97_RS08650	COG4974	L	Site-specificrecombinaseXerD		XerD
AUO97_RS08655	COG1918	P	Fe2+transportproteinFeoA		FeoA
AUO97_RS08660	COG0370	P	Fe2+transporterFeoB		FeoB
AUO97_RS08665
AUO97_RS08670	COG0771	M	UDP-N-acetylmuramoylalanine-D-glutamateligase	Mureinebiosynthesis	MurD
AUO97_RS08675	COG0772	D	PeptodoglycanpolymeraseFtsW/RodA/SpoVE		FtsW
AUO97_RS08680	COG0008	J	Glutamyl-orglutaminyl-tRNAsynthetase	Hemebiosynthesis	GlnS
AUO97_RS08685	COG1734	K	RNApolymerase-bindingtranscriptionfactorDksA		DksA
AUO97_RS08690	COG1409	T	3',5'-cyclicAMPphosphodiesteraseCpdA		CpdA
AUO97_RS08695	COG0494	V	8-oxo-dGTPpyrophosphataseMutTandrelatedhouse-cleaningNTPpyrophosphohydrolases,NUDIXfamily		MutT
AUO97_RS08700	COG0422	H	4-amino-2-methyl-5-hydroxymethylpyrimidine(HMP)synthaseThiC	Thiaminebiosynthesis	ThiC
AUO97_RS08705
AUO97_RS08710	COG1309	K	DNA-bindingprotein,AcrRfamily,includesnucleoidocclusionproteinSlmA		AcrR
AUO97_RS08715	COG0697	G	Permeaseofthedrug/metabolitetransporter(DMT)superfamily		RhaT
AUO97_RS08720	COG1538	M	OutermembraneproteinTolC		TolC
AUO97_RS08725	COG0704	P	PhosphateuptakeregulatorPhoU		PhoU
AUO97_RS08730	COG2924	P	Fe-SclusterbiosynthesisandrepairproteinYggX		YggX
AUO97_RS08735	COG0165	E	Argininosuccinatelyase	Argininebiosynthesis	ArgH
AUO97_RS08740	COG3275	T	Sensorhistidinekinase,LytS/YehUfamily		LytS
AUO97_RS08745	COG3279	K	DNA-bindingresponseregulator,LytR/AlgRfamily		LytT
AUO97_RS08750	COG0181	H	Porphobilinogendeaminase	Hemebiosynthesis	HemC
AUO97_RS08750	COG0181	H	Porphobilinogendeaminase	Hemebiosynthesis	HemC
AUO97_RS08755	COG1587	H	Uroporphyrinogen-IIIsynthase	Hemebiosynthesis	HemD
AUO97_RS08760
AUO97_RS08765
AUO97_RS08775	COG2916	K	DNA-bindingproteinH-NS		Hns
AUO97_RS08780
AUO97_RS08785	COG3031	U	TypeIIsecretorypathway,componentPulC		PulC
AUO97_RS08790	COG1450	U	TypeIIsecretorypathwaycomponentGspD/PulD(secretin)		PulD
AUO97_RS08790	COG1450	U	TypeIIsecretorypathwaycomponentGspD/PulD(secretin)		PulD
AUO97_RS08795	COG1716	T	Forkheadassociated(FHA)domain,bindspSer,pThr,pTyr		FHA
AUO97_RS08800	COG0546	C	Phosphoglycolatephosphatase,HADsuperfamily		Gph
AUO97_RS08805	COG0147	E	Anthranilate/para-aminobenzoatesynthasescomponentI	Aromaticaminoacidbiosynthesis	TrpE
AUO97_RS08805	COG0147	E	Anthranilate/para-aminobenzoatesynthasescomponentI	Aromaticaminoacidbiosynthesis	TrpE
AUO97_RS08830	COG0050	J	TranslationelongationfactorEF-Tu,aGTPase	Translationfactors	TufA
AUO97_RS08830	COG0050	J	TranslationelongationfactorEF-Tu,aGTPase	Translationfactors	TufA
AUO97_RS08840	COG0690	U	PreproteintranslocasesubunitSecE		SecE
AUO97_RS08845	COG0250	K	Transcriptiontermination/antiterminationproteinNusG		NusG
AUO97_RS08850	COG0080	J	RibosomalproteinL11	Ribosome50Ssubunit	RplK
AUO97_RS08855	COG0081	J	RibosomalproteinL1	Ribosome50Ssubunit	RplA
AUO97_RS08860	COG0244	J	RibosomalproteinL10	Ribosome50Ssubunit	RplJ
AUO97_RS08865	COG0222	J	RibosomalproteinL7/L12	Ribosome50Ssubunit	RplL
AUO97_RS08870	COG0085	K	DNA-directedRNApolymerase,betasubunit/140kDsubunit	RNApolymerase	RpoB
AUO97_RS08875	COG0086	K	DNA-directedRNApolymerase,beta'subunit/160kDsubunit	RNApolymerase	RpoC
AUO97_RS08875	COG0086	K	DNA-directedRNApolymerase,beta'subunit/160kDsubunit	RNApolymerase	RpoC
AUO97_RS08880
AUO97_RS08885
AUO97_RS08890	COG2050	Q	Acyl-CoAthioesterasePaaI,containsHGGmotif		PaaI
AUO97_RS08895	COG0596	H	2-succinyl-6-hydroxy-2,4-cyclohexadiene-1-carboxylatesynthaseMenHandrelatedesterases,alpha/betahydrolasefold	Menaquinonebiosynthesis	MenH
AUO97_RS08900	COG2056	E	PredictedhistidinetransporterYuiF,NhaCfamily		YuiF
AUO97_RS08905	COG3047	M	OutermembraneproteinOmpW		OmpW
AUO97_RS08910	COG4461	V	LysozymeinhibitorLprI		LprI
AUO97_RS08915	COG0326	O	Molecularchaperone,HSP90family		HtpG
AUO97_RS08920
AUO97_RS08925
AUO97_RS08930	COG2761	O	Predicteddithiol-disulfideisomerase,DsbA/YjbHfamily(virulence,stressresistance)		FrnE
AUO97_RS08935
AUO97_RS08940	COG0789	K	DNA-bindingtranscriptionalregulator,MerRfamily		SoxR
AUO97_RS08945	COG3545	R	Predictedesteraseofthealpha/betahydrolasefold		YdeN
AUO97_RS08955
AUO97_RS08960
AUO97_RS08965	COG0183	I	Acetyl-CoAacetyltransferase	Fattyacidbiosynthesis	PaaJ
AUO97_RS08970	COG1250	I	3-hydroxyacyl-CoAdehydrogenase	Fattyacidbiosynthesis	FadB
AUO97_RS08975	COG3555	O	Aspartyl/asparaginylbeta-hydroxylase,cupinsuperfamily		LpxO2
AUO97_RS08980
AUO97_RS08985	COG0322	L	ExcinucleaseUvrABC,nucleasesubunit		UvrC
AUO97_RS08990	COG1946	I	Acyl-CoAthioesterase		TesB
AUO97_RS08995	COG0558	I	Phosphatidylglycerophosphatesynthase	Phospholipidbiosynthesis	PgsA
AUO97_RS09000	COG2207	K	AraC-typeDNA-bindingdomainandAraC-containingproteins		AraC
AUO97_RS09005	COG3145	L	AlkylatedDNArepairdioxygenaseAlkB		AlkB
AUO97_RS09010	COG1414	K	DNA-bindingtranscriptionalregulator,IclRfamily		IclR
AUO97_RS09015	COG1289	S	UncharacterizedmembraneproteinYccC		YccC
AUO97_RS09020
AUO97_RS09025	COG1566	V	MultidrugresistanceeffluxpumpEmrA		EmrA
AUO97_RS09030	COG0816	J	YqgF/RuvXprotein,pre-16SrRNAmaturationRNase/Hollidayjunctionresolvase/anti-terminationfactor		YqgF
AUO97_RS09035	COG1678	K	Putativetranscriptionalregulator,AlgH/UPF0301family		AlgH
AUO97_RS09040	COG0497	L	DNArepairATPaseRecN		RecN
AUO97_RS09040	COG0497	L	DNArepairATPaseRecN		RecN
AUO97_RS09045	COG5010	U	FlppilusassemblyproteinTadD,containsTPRrepeats		TadD
AUO97_RS09050	COG3123	F	Pyrimidine/purinenucleosidephosphorylaseYaiE/PpnP,UPF0345/DUF1255family		PpnP
AUO97_RS09055	COG0566	J	tRNAG18(ribose-2'-O)-methylaseSpoU	tRNAmodification	SpoU
AUO97_RS09060	COG0697	G	Permeaseofthedrug/metabolitetransporter(DMT)superfamily		RhaT
AUO97_RS09065	COG0237	H	Dephospho-CoAkinase	Pantothenate/CoAbiosynthesis	CoaE
AUO97_RS09070	COG1989	N	PrepilinsignalpeptidasePulO(typeIIsecretorypathway)orrelatedpeptidase		PulO
AUO97_RS09075	COG1459	N	TypeIIsecretorypathway,componentPulF		PulF
AUO97_RS09080	COG2804	N	TypeIIsecretorypathwayATPaseGspE/PulEorT4PpilusassemblypathwayATPasePilB		PulE
AUO97_RS09085	COG0149	G	Triosephosphateisomerase	Glycolysis	TpiA
AUO97_RS09090	COG1314	U	ProteintranslocasesubunitSecG		SecG
AUO97_RS09105	COG0779	J	RibosomematurationfactorRimP		RimP
AUO97_RS09110	COG0195	K	TranscriptionantiterminationfactorNusA,containsS1andKHdomains		NusA
AUO97_RS09115	COG0532	J	TranslationinitiationfactorIF-2,aGTPase	Translationfactors	InfB
AUO97_RS09120	COG0858	J	Ribosome-bindingfactorRbfA		RbfA
AUO97_RS09125	COG1320	P	MultisubunitNa+/H+antiporter,MnhGsubunit		MnhG
AUO97_RS09130	COG2212	P	MultisubunitNa+/H+antiporter,MnhFsubunit		MnhF
AUO97_RS09135	COG1863	P	MultisubunitNa+/H+antiporter,MnhEsubunit		MnhE
AUO97_RS09140	COG0651	C	Formatehydrogenlyasesubunit3/MultisubunitNa+/H+antiporter,MnhDsubunit		HyfB
AUO97_RS09145	COG1006	P	MultisubunitNa+/H+antiporter,MnhCsubunit		MnhC
AUO97_RS09150	COG2111	P	MultisubunitNa+/H+antiporter,MnhBsubunit		MnhB
AUO97_RS09155	COG3950	R	PredictedATP-bindingproteininvolvedinvirulence
AUO97_RS09160	COG1074	L	3í-5íhelicasesubunitRecBoftheDNArepairenzymeRecBCD(exonucleaseV)		RecB
AUO97_RS09160	COG1074	L	3í-5íhelicasesubunitRecBoftheDNArepairenzymeRecBCD(exonucleaseV)		RecB
AUO97_RS09165	COG0140	E	Phosphoribosyl-ATPpyrophosphohydrolase	Histidinebiosynthesis	HisI2
AUO97_RS09170	COG0654	H	2-polyprenyl-6-methoxyphenolhydroxylaseandrelatedFAD-dependentoxidoreductases	Ubiquinonebiosynthesis	UbiH
AUO97_RS09175	COG0661	H	Predictedproteinkinaseregulatingubiquinonebiosynthesis,AarF/ABC1/UbiBfamily	Ubiquinonebiosynthesis	AarF
AUO97_RS09180	COG3165	H	UbiquinonebiosynthesisproteinUbiJ,containsSCP2domain		UbiJ
AUO97_RS09185	COG2226	H	Ubiquinone/menaquinonebiosynthesisC-methylaseUbiE/MenG	Biotinbiosynthesis	UbiE
AUO97_RS09190
AUO97_RS09195	COG2326	C	Polyphosphatekinase2,PPK2family		PPK2
AUO97_RS09200
AUO97_RS09205	COG1330	L	ScaffoldsubunitRecCoftheDNArepairenzymeRecBCD(exonucleaseV)		RecC
AUO97_RS09210	COG1074	L	3í-5íhelicasesubunitRecBoftheDNArepairenzymeRecBCD(exonucleaseV)		RecB
AUO97_RS09215	COG0507	L	ATPase/5í-3íhelicasehelicasesubunitRecDoftheDNArepairenzymeRecBCD(exonucleaseV)		RecD
AUO97_RS09220	COG1680	V	CubicOgrouppeptidase,beta-lactamaseclassCfamily		AmpC
AUO97_RS09225	COG0184	J	RibosomalproteinS15P/S13E	Ribosome30Ssubunit	RpsO
AUO97_RS09230	COG1185	J	Polyribonucleotidenucleotidyltransferase(polynucleotidephosphorylase)		Pnp
AUO97_RS09235	COG0598	P	Mg2+andCo2+transporterCorA		CorA
AUO97_RS09240
AUO97_RS09245	COG0484	O	DnaJ-classmolecularchaperonewithC-terminalZnfingerdomain		DnaJ
AUO97_RS09250	COG1280	E	Threonine/homoserine/homoserinelactoneeffluxprotein		RhtB
AUO97_RS09255	COG1281	O	Redox-regulatedmolecularchaperone,HSP33family		HslO
AUO97_RS09260	COG1226	P	Voltage-gatedpotassiumchannelKch		Kch
AUO97_RS09265	COG1198	L	PrimosomalproteinN'(replicationfactorY)-superfamilyIIhelicase		PriA
AUO97_RS09270	COG1459	N	TypeIIsecretorypathway,componentPulF		PulF
AUO97_RS09275	COG2165	N	TypeIIsecretorypathway,pseudopilinPulG		PulG
AUO97_RS09280
AUO97_RS09285	COG0073	J	tRNA-bindingEMAP/Myfdomain		EMAP
AUO97_RS09290	COG0815	M	ApolipoproteinN-acyltransferase		Lnt
AUO97_RS09290	COG0815	M	ApolipoproteinN-acyltransferase		Lnt
AUO97_RS09295	COG4535	P	Mg2+andCo2+transporterCorC,containsCBSpairandCorC-HlyCdomains		CorC
AUO97_RS09300	COG0425	J	SulfurcarrierproteinTusA(tRNAthiolation,molybdenumcofactorbiosynthesis)		TusA
AUO97_RS09310	COG2440	C	Ferredoxin-likeproteinFixX		FixX
AUO97_RS09310	COG2440	C	Ferredoxin-likeproteinFixX		FixX
AUO97_RS09315	COG3816	S	Uncharacterizedconservedprotein,DUF1285family
AUO97_RS09320	COG0796	M	Glutamateracemase	Mureinebiosynthesis	MurI
AUO97_RS09325
AUO97_RS09330	COG0276	H	Protohemeferro-lyase(ferrochelatase)	Hemebiosynthesis	HemH
AUO97_RS09335	COG0491	R	Glyoxylaseorarelatedmetal-dependenthydrolase,beta-lactamasesuperfamilyII		GloB
AUO97_RS09340	COG3024	L	EndogenousinhibitorofDNAgyrase,YacG/DUF329family		YacG
AUO97_RS09345	COG0220	J	tRNAG46N7-methylaseTrmB	tRNAmodification	TrmB
AUO97_RS09350	COG2081	R	PredictedflavoproteinYhiN		YhiN
AUO97_RS09355	COG3791	S	Uncharacterizedconservedprotein
AUO97_RS09360	COG0239	D	FluorideionexporterCrcB/FEX,affectschromosomecondensation		CrcB
AUO97_RS09370
AUO97_RS09375	COG0254	J	RibosomalproteinL31	Ribosome50Ssubunit	RpmE
AUO97_RS09380	COG0661	H	Predictedproteinkinaseregulatingubiquinonebiosynthesis,AarF/ABC1/UbiBfamily	Ubiquinonebiosynthesis	AarF
AUO97_RS09390	COG1960	I	Acyl-CoAdehydrogenaserelatedtothealkylationresponseproteinAidB	Fattyacidbiosynthesis	CaiA
AUO97_RS09395	COG0534	V	Na+-drivenmultidrugeffluxpump,DinF/NorM/MATEfamily		NorM
AUO97_RS09400	COG3238	S	UncharacterizedmembraneproteinYdcZ,DUF606family		ydcZ
AUO97_RS09400	COG3238	S	UncharacterizedmembraneproteinYdcZ,DUF606family		ydcZ
AUO97_RS09405	COG0635	H	Coproporphyrinogen-IIIoxidaseHemN(oxygen-independent)orrelatedFe-Soxidoreductase	Hemebiosynthesis	HemN
AUO97_RS09410	COG1028	I	NAD(P)-dependentdehydrogenase,short-chainalcoholdehydrogenasefamily	Fattyacidbiosynthesis	FabG
AUO97_RS09415	COG0583	K	DNA-bindingtranscriptionalregulator,LysRfamily		LysR
AUO97_RS09430	COG0318	I	O-succinylbenzoicacid-CoAligaseMenEorrelatedacyl-CoAsynthetase(AMP-forming)	Menaquinonebiosynthesis	MenE/FadK
AUO97_RS09435	COG1530	J	RibonucleaseGorE		CafA
AUO97_RS09445	COG0564	J	PseudouridinesynthaseRluA,23SrRNA-ortRNA-specific	23SrRNAmodification	RluA
AUO97_RS09450	COG0546	C	Phosphoglycolatephosphatase,HADsuperfamily		Gph
AUO97_RS09455	COG2378	K	PredictedDNA-bindingtranscriptionalregulatorYobV,containsHTHandWYLdomains		YobV
AUO97_RS09460	COG0625	O	GlutathioneS-transferase		GstA
AUO97_RS09465	COG4291	S	Uncharacterizedmembraneprotein
AUO97_RS09470	COG0583	K	DNA-bindingtranscriptionalregulator,LysRfamily		LysR
AUO97_RS09475	COG2220	G	L-ascorbatelactonaseUlaG,metallo-beta-lactamasesuperfamily		UlaG
AUO97_RS09480	COG0376	P	Catalase(peroxidaseI)		KatG
AUO97_RS09485	COG3605	T	SignaltransductionproteincontainingGAFandPtsIdomains		PtsP
AUO97_RS09490	COG0494	V	8-oxo-dGTPpyrophosphataseMutTandrelatedhouse-cleaningNTPpyrophosphohydrolases,NUDIXfamily		MutT
AUO97_RS09495	COG0560	E	Phosphoserinephosphatase	Serinebiosynthesis	SerB
AUO97_RS09500	COG0583	K	DNA-bindingtranscriptionalregulator,LysRfamily		LysR
AUO97_RS09505	COG3205	S	Uncharacterizedmembraneprotein,DUF2061family
AUO97_RS09510	COG0065	E	Homoaconitase/3-isopropylmalatedehydrataselargesubunit	Isoleucine,leucine,valinebiosynthesis	LeuC
AUO97_RS09515	COG0066	E	3-isopropylmalatedehydratasesmallsubunit	Isoleucine,leucine,valinebiosynthesis	LeuD
AUO97_RS09520
AUO97_RS09525	COG0473	C	Isocitrate/isopropylmalatedehydrogenase	TCAcycle	LeuB
AUO97_RS09530
AUO97_RS09535	COG3755	S	UncharacterizedconservedproteinYecT,DUF1311family		YecT
AUO97_RS09535	COG3755	S	UncharacterizedconservedproteinYecT,DUF1311family		YecT
AUO97_RS09540	COG0361	J	TranslationinitiationfactorIF-1	Translationfactors	InfA
AUO97_RS09545	COG2207	K	AraC-typeDNA-bindingdomainandAraC-containingproteins		AraC
AUO97_RS09550	COG0101	J	tRNAU38,U39,U40pseudouridinesynthaseTruA	tRNAmodification	TruA
AUO97_RS09555	COG0252	J	L-asparaginase/archaealGlu-tRNAGlnamidotransferasesubunitD		AnsA
AUO97_RS09560
AUO97_RS09565	COG3170	N	TypeIVpilusassemblyproteinFimV		FimV
AUO97_RS09570	COG0136	E	Aspartate-semialdehydedehydrogenase	Lysinebiosynthesis	Asd
AUO97_RS09575	COG3021	R	UncharacterizedconservedproteinYafD,endonuclease/exonuclease/phosphatase(EEP)superfamily		YafD
AUO97_RS09580	COG1301	C	Na+/H+-dicarboxylatesymporter		GltP
AUO97_RS09585	COG0438	M	Glycosyltransferaseinvolvedincellwallbisynthesis		RfaB
AUO97_RS09590	COG1560	I	Palmitoleoyl-ACP:Kdo2-lipid-IVacyltransferase(lipidAbiosynthesis)	LipidAbiosynthesis	LpxP
AUO97_RS09590	COG1560	I	Palmitoleoyl-ACP:Kdo2-lipid-IVacyltransferase(lipidAbiosynthesis)	LipidAbiosynthesis	LpxP
AUO97_RS09595	COG1280	E	Threonine/homoserine/homoserinelactoneeffluxprotein		RhtB
AUO97_RS09600	COG0488	R	ATPasecomponentsofABCtransporterswithduplicatedATPasedomains		Uup
AUO97_RS09605	COG2900	S	Uncharacterizedcoiled-coilproteinSlyX(sensitivetolysisX)		SlyX
AUO97_RS09610	COG0604	C	NADPH:quinonereductaseorrelatedZn-dependentoxidoreductase		Qor
AUO97_RS09615	COG1733	K	DNA-bindingtranscriptionalregulator,HxlRfamily		HxlR
AUO97_RS09620
AUO97_RS09625	COG0551	L	DNAtopoisomeraseI,ssDNA-bindingZn-fingerandZn-ribbondomains		YrdD
AUO97_RS09630
AUO97_RS09635	COG3247	R	AcidresistancemembraneproteinHdeD,DUF308family		HdeD
AUO97_RS09640	COG0210	L	SuperfamilyIDNAorRNAhelicase		UvrD
AUO97_RS09645	COG0724	J	RNArecognitionmotif(RRM)domain		RRM
AUO97_RS09650
AUO97_RS09655
AUO97_RS09660
AUO97_RS09665	COG4651	P	PredictedKef-typeK+transportprotein,K+/H+antiporterdomain		RosB
AUO97_RS09670	COG0267	J	RibosomalproteinL33	Ribosome50Ssubunit	RpmG
AUO97_RS09675	COG0227	J	RibosomalproteinL28	Ribosome50Ssubunit	RpmB
AUO97_RS09680	COG1012	I	Acyl-CoAreductaseorotherNAD-dependentaldehydedehydrogenase	Prolinedegradation	AdhE
AUO97_RS09685	COG1309	K	DNA-bindingprotein,AcrRfamily,includesnucleoidocclusionproteinSlmA		AcrR
AUO97_RS09690	COG0788	F	Formyltetrahydrofolatehydrolase	Purinebiosynthesis	PurU
AUO97_RS09695	COG0810	M	PeriplasmicproteinTonB,linksinnerandoutermembranes		TonB
AUO97_RS09700	COG0811	U	BiopolymertransportproteinExbB/TolQ		TolQ
AUO97_RS09705	COG0848	U	BiopolymertransportproteinExbD		ExbD
AUO97_RS09710	COG0225	O	PeptidemethioninesulfoxidereductaseMsrA		MsrA
AUO97_RS09715
AUO97_RS09720	COG0262	H	Dihydrofolatereductase	Folatebiosynthesis	FolA
AUO97_RS09725	COG0207	F	Thymidylatesynthase	Thymidylatebiosynthesis	ThyA
AUO97_RS09730
AUO97_RS09735
AUO97_RS09740	COG0682	M	Prolipoproteindiacylglyceryltransferase		Lgt
AUO97_RS09745	COG3332	R	Uncharacterizedstress-responsiveprotein,TANGO2(TransportandGolgiorganisation2)family,containsNRDEmotif		Tango2
AUO97_RS09750	COG3211	R	Secretedphosphatase,PhoXfamily		PhoX
AUO97_RS09755	COG3211	R	Secretedphosphatase,PhoXfamily		PhoX
AUO97_RS09755	COG3211	R	Secretedphosphatase,PhoXfamily		PhoX
AUO97_RS09760	COG0805	U	Twin-arginineproteinsecretionpathwaycomponentTatC		TatC
AUO97_RS09765	COG1826	U	Twin-arginineproteinsecretionpathwaycomponentsTatAandTatB		TatA
AUO97_RS09770	COG1826	U	Twin-arginineproteinsecretionpathwaycomponentsTatAandTatB		TatA
AUO97_RS09775	COG0679	R	Predictedpermease,AEC(auxineffluxcarrier)family		YfdV
AUO97_RS09780	COG0127	F	Inosine/xanthosinetriphosphatepyrophosphatase,all-alphaNTP-PPasefamily		RdgB
AUO97_RS09785	COG0790	R	TPRrepeat		TPR
AUO97_RS09790	COG2226	H	Ubiquinone/menaquinonebiosynthesisC-methylaseUbiE/MenG	Biotinbiosynthesis	UbiE
AUO97_RS09795	COG2021	E	HomoserineO-acetyltransferase	Methioninebiosynthesis	MET2
AUO97_RS09800	COG0119	E	Isopropylmalate/homocitrate/citramalatesynthases	Isoleucine,leucine,valinebiosynthesis	LeuA
AUO97_RS09805	COG3128	R	Predicted2-oxoglutarate-andFe(II)-dependentdioxygenaseYbiX		PiuC
AUO97_RS09810	COG4774	P	Outermembranereceptorformonomericcatechols		Fiu
AUO97_RS09815	COG0544	O	FKBP-typepeptidyl-prolylcis-transisomerase(triggerfactor)		Tig
AUO97_RS09820	COG0740	O	ATP-dependentproteaseClpP,proteasesubunit		ClpP
AUO97_RS09825	COG1219	O	ATP-dependentproteaseClp,ATPasesubunitClpX		ClpX
AUO97_RS09830
AUO97_RS09835
AUO97_RS09840	COG1951	C	Tartratedehydratasealphasubunit/FumaratehydrataseclassI,N-terminaldomain	TCAcycle	TtdA
AUO97_RS09845	COG0857	R	BioD-likeN-terminaldomainofphosphotransacetylase		PtaN
AUO97_RS09850	COG0282	C	Acetatekinase		AckA
AUO97_RS09855	COG0129	E	Dihydroxyaciddehydratase/phosphogluconatedehydratase	Isoleucine,leucine,valinebiosynthesis	IlvD
AUO97_RS09860	COG0800	G	2-keto-3-deoxy-6-phosphogluconatealdolase	Entner-Doudoroffpathway	Eda
AUO97_RS09860	COG0800	G	2-keto-3-deoxy-6-phosphogluconatealdolase	Entner-Doudoroffpathway	Eda
AUO97_RS09865	COG2610	G	H+/gluconatesymporterGntTorrelatedpermease,GntP/DsdXfamily		GntT
AUO97_RS09870	COG3265	G	Gluconatekinase	Non-phosphorylatedEntner-Doudoroffpathway	GntK
AUO97_RS09875	COG1012	I	Acyl-CoAreductaseorotherNAD-dependentaldehydedehydrogenase	Prolinedegradation	AdhE
AUO97_RS09880	COG0014	E	Gamma-glutamylphosphatereductase	Prolinebiosynthesis	ProA
AUO97_RS09885	COG0596	H	2-succinyl-6-hydroxy-2,4-cyclohexadiene-1-carboxylatesynthaseMenHandrelatedesterases,alpha/betahydrolasefold	Menaquinonebiosynthesis	MenH
AUO97_RS09890	COG3315	Q	O-Methyltransferaseinvolvedinpolyketidebiosynthesis		YktD
AUO97_RS09895	COG1472	G	Periplasmicbeta-glucosidaseandrelatedglycosidases		BglX
AUO97_RS09900	COG0793	O	C-terminalprocessingproteaseCtpA/Prc,containsaPDZdomain		CtpA
AUO97_RS09905	COG0438	M	Glycosyltransferaseinvolvedincellwallbisynthesis		RfaB
AUO97_RS09910	COG0671	I	Membrane-associatedphospholipidphosphatase	Phospholipidbiosynthesis	PgpB
AUO97_RS09915	COG2975	O	Fe-S-clusterformationregulatorIscX/YfhJ		IscX
AUO97_RS09920	COG0105	F	Nucleosidediphosphatekinase	Pyrimidinebiosynthesis	Ndk
AUO97_RS09925	COG0820	J	AdenineC2-methylaseRlmNof23SrRNAA2503andtRNAA37	23SrRNAmodification	RlmN
AUO97_RS09930	COG3063	N	TypeIVpilusassemblyproteinPilF/PilW		PilF
AUO97_RS09935	COG1426	D	CytoskeletalproteinRodZ,containsXre-likeHTHandDUF4115domains		RodZ
AUO97_RS09940	COG0821	I	4-hydroxy-3-methylbut-2-en-1-yldiphosphatesynthaseIspG/GcpE	Isoprenoidbiosynthesis	IspG
AUO97_RS09945	COG0124	J	Histidyl-tRNAsynthetase	Aminoacyl-tRNAsynthetases	HisS
AUO97_RS09950	COG2976	T	PutativenegativeregulatorofRcsB-dependentstressresponse,UPF0070family		YfgM
AUO97_RS09955	COG1520	M	OutermembraneproteinassemblyfactorBamB,containsPQQ-likebeta-propellerrepeat		PQQ
AUO97_RS09960	COG1160	J	DoubleEra-likedomainGTPaseDer		Der
AUO97_RS10060	COG2091	H	Phosphopantetheinyltransferase		Sfp
AUO97_RS10065	COG1952	U	PreproteintranslocasesubunitSecB		SecB
AUO97_RS10070	COG0695	O	Glutaredoxin		GrxC
AUO97_RS10075	COG0607	P	Rhodanese-relatedsulfurtransferase	Ureacycle	PspE
AUO97_RS10080	COG1162	J	RibosomebiogenesisGTPaseRsgA		RsgA
AUO97_RS10085	COG1949	A	Oligoribonuclease(3'-5'exoribonuclease)		Orn
AUO97_RS10090	COG4760	S	Uncharacterizedmembraneprotein,YccA/Baxinhibitorfamily
AUO97_RS10095	COG0623	I	Enoyl-[acyl-carrier-protein]reductaseFabI	Fattyacidbiosynthesis	FabI
AUO97_RS10100	COG1538	M	OutermembraneproteinTolC		TolC
AUO97_RS10100	COG1538	M	OutermembraneproteinTolC		TolC
AUO97_RS10105	COG1136	M	ABC-typelipoproteinexportsystem,ATPasecomponent		LolD
AUO97_RS10110	COG0845	M	MultidrugeffluxpumpsubunitAcrA(membrane-fusionprotein)		AcrA
AUO97_RS10115	COG1466	L	DNApolymeraseIII,deltasubunit		HolA
AUO97_RS10120	COG2980	M	OutermembranelipoproteinLptE/RlpB(LPSassembly)		LptE
AUO97_RS10125	COG0495	J	Leucyl-tRNAsynthetase	Aminoacyl-tRNAsynthetases	LeuS
AUO97_RS10135
AUO97_RS10140	COG0028	E	Acetolactatesynthaselargesubunitorotherthiaminepyrophosphate-requiringenzyme	Isoleucine,leucine,valinebiosynthesis	IlvB
AUO97_RS10145	COG0440	E	Acetolactatesynthase,smallsubunit	Isoleucine,leucine,valinebiosynthesis	IlvH
AUO97_RS10150	COG0059	E	Ketol-acidreductoisomerase	Isoleucine,leucine,valinebiosynthesis	IlvC
AUO97_RS10155	COG5001	T	Cyclicdi-GMPmetabolismprotein,combinesGGDEFandEALdomainswitha6TMmembranedomain
AUO97_RS10165	COG1309	K	DNA-bindingprotein,AcrRfamily,includesnucleoidocclusionproteinSlmA		AcrR
AUO97_RS10170	COG1309	K	DNA-bindingprotein,AcrRfamily,includesnucleoidocclusionproteinSlmA		AcrR
AUO97_RS10175
AUO97_RS10190	COG5620	S	Uncharacterizedconservedprotein,DUF1851domain
AUO97_RS10200	COG4108	J	PeptidechainreleasefactorRF-3	Translationfactors	PrfC
AUO97_RS10205
AUO97_RS10210
AUO97_RS10215	COG0084	N	3'->5'ssDNA/RNAexonucleaseTatD		TatD
AUO97_RS10220	COG1048	C	AconitaseA	LysinebiosynthesisTCAcycle	AcnA
AUO97_RS10225	COG1179	J	tRNAA37threonylcarbamoyladenosinedehydratase	tRNAmodification	TcdA
AUO97_RS10230	COG0583	K	DNA-bindingtranscriptionalregulator,LysRfamily		LysR
AUO97_RS10235
AUO97_RS10240	COG0042	J	tRNA-dihydrouridinesynthase	tRNAmodification	DusA
AUO97_RS10245	COG2814	G	PredictedarabinoseeffluxpermeaseAraJ,MFSfamily		AraJ
AUO97_RS10245	COG2814	G	PredictedarabinoseeffluxpermeaseAraJ,MFSfamily		AraJ
AUO97_RS10245	COG2814	G	PredictedarabinoseeffluxpermeaseAraJ,MFSfamily		AraJ
AUO97_RS10250	COG0251	V	EnaminedeaminaseRidA,housecleaningofreactiveenamineintermediates,YjgF/YER057c/UK114family	Pyrimidinedegradation	RidA
AUO97_RS10255	COG0697	G	Permeaseofthedrug/metabolitetransporter(DMT)superfamily		RhaT
AUO97_RS10260	COG3288	C	NAD/NADPtranshydrogenasealphasubunit		PntA
AUO97_RS10265	COG3288	C	NAD/NADPtranshydrogenasealphasubunit		PntA
AUO97_RS10270	COG1282	C	NAD/NADPtranshydrogenasebetasubunit		PntB
AUO97_RS10275	COG1028	I	NAD(P)-dependentdehydrogenase,short-chainalcoholdehydrogenasefamily	Fattyacidbiosynthesis	FabG
AUO97_RS10280	COG0799	J	RibosomalsilencingfactorRsfS,regulatesassociationof30Sand50Ssubunits		RsfS
AUO97_RS10285	COG3622	G	Hydroxypyruvate/dehydroerythronateisomerase,Hyi/OtnIfamily		Hyi
AUO97_RS10290	COG2084	I	3-hydroxyisobutyratedehydrogenaseorrelatedbeta-hydroxyaciddehydrogenase		MmsB
AUO97_RS10295	COG1024	I	Enoyl-CoAhydratase/carnithineracemase	Fattyacidbiosynthesis	CaiD
AUO97_RS10300	COG2198	T	HPt(histidine-containingphosphotransfer)domain		HPtr
AUO97_RS10305	COG0031	E	Cysteinesynthase	Cysteinebiosynthesis	CysK
AUO97_RS10310	COG0417	L	DNApolymeraseBelongationsubunit		PolB
AUO97_RS10315	COG2265	J	tRNA/tmRNA/rRNAuracil-C5-methylase,TrmA/RlmC/RlmDfamily	tRNAmodification	TrmA
AUO97_RS10320	COG0317	T	(p)ppGppsynthase/hydrolase,HDsuperfamily		SpoT
AUO97_RS10325	COG4221	C	NADP-dependent3-hydroxyaciddehydrogenaseYdfG	Pyrimidinedegradation	YdfG
AUO97_RS10330	COG3956	R	UncharacterizedconservedproteinYabN,containstetrapyrrolemethylaseandMazG-likepyrophosphatasedomain		YabN
AUO97_RS10335	COG1555	L	DNAuptakeproteinComEorrelatedDNA-bindingprotein		ComEA
AUO97_RS10340	COG0617	J	tRNAnucleotidyltransferase/poly(A)polymerase	tRNAmodification	PcnB
AUO97_RS10345	COG0801	H	7,8-dihydro-6-hydroxymethylpterinpyrophosphokinase(folatebiosynthesis)	Folatebiosynthesis	FolK
AUO97_RS10350	COG0413	H	Ketopantoatehydroxymethyltransferase	Pantothenate/CoAbiosynthesis	PanB
AUO97_RS10355	COG0414	H	Panthothenatesynthetase	Pantothenate/CoAbiosynthesis	PanC
AUO97_RS10360	COG1660	T	RNaseadaptorproteinRapZforGlmZsRNAdegradation,containsaP-loopATPasedomain		RapZ
AUO97_RS10365	COG1925	T	HProrrelatedphosphotransferprotein		PtsH
AUO97_RS10370	COG3028	J	Ribosomal50Ssubunit-associatedproteinYjgA,DUF615family		YjgA
AUO97_RS10375	COG0318	I	O-succinylbenzoicacid-CoAligaseMenEorrelatedacyl-CoAsynthetase(AMP-forming)	Menaquinonebiosynthesis	MenE/FadK
AUO97_RS10380	COG0441	J	Threonyl-tRNAsynthetase	Aminoacyl-tRNAsynthetases	ThrS
AUO97_RS10385	COG0290	J	TranslationinitiationfactorIF-3	Translationfactors	InfC
AUO97_RS10395	COG0625	O	GlutathioneS-transferase		GstA
AUO97_RS10400	COG1238	S	UncharacterizedmembraneproteinYqaA,VTTdomain		YgaA
AUO97_RS10405
AUO97_RS10415	COG0291	J	RibosomalproteinL35	Ribosome50Ssubunit	RpmI
AUO97_RS10420	COG0292	J	RibosomalproteinL20	Ribosome50Ssubunit	RplT
AUO97_RS10430	COG3236	H	N-glycosidaseYbiA/RibX(riboflavinbiosynthesis,damagecontrol),NADARsuperfamily		RibX
AUO97_RS10435
AUO97_RS10440
AUO97_RS10445	COG0016	J	Phenylalanyl-tRNAsynthetasealphasubunit	Aminoacyl-tRNAsynthetases	PheS
AUO97_RS10450	COG0073	J	tRNA-bindingEMAP/Myfdomain		EMAP
AUO97_RS10455	COG0776	L	BacterialnucleoidDNA-bindingproteinIHF-alpha		HimA
AUO97_RS10460
AUO97_RS10465	COG1158	K	TranscriptionterminationfactorRho		Rho
AUO97_RS10470	COG3118	O	ChaperedoxinCnoX,containsthioredoxin-likeandTPR-likedomains,YbbN/TrxSCfamily		CnoX
AUO97_RS10475	COG0248	F	Exopolyphosphatase/pppGpp-phosphohydrolase		GppA
AUO97_RS10480	COG0825	I	Acetyl-CoAcarboxylasealphasubunit	Fattyacidbiosynthesis	AccA
AUO97_RS10485	COG0037	J	tRNA(Ile)-lysidinesynthaseTilS/MesJ	tRNAmodification	TilS
AUO97_RS10490	COG0345	E	Pyrroline-5-carboxylatereductase	Prolinebiosynthesis	ProC
AUO97_RS10495	COG0762	O	Cytochromeb6maturationproteinCCB3/Ycf19andrelatedmaturases,YggTfamily		Ycf19
AUO97_RS10500	COG0749	L	DNApolymeraseI,3'-5'exonucleaseandpolymerasedomains		PolA
AUO97_RS10505	COG5373	S	Uncharacterizedmembraneprotein
AUO97_RS10510	COG3264	M	Small-conductancemechanosensitivechannelMscK		MscK
AUO97_RS10515
AUO97_RS10520	COG2804	N	TypeIIsecretorypathwayATPaseGspE/PulEorT4PpilusassemblypathwayATPasePilB		PulE
AUO97_RS10525	COG1764	V	OrganichydroperoxidereductaseOsmC/OhrA		OsmC
AUO97_RS10525	COG1764	V	OrganichydroperoxidereductaseOsmC/OhrA		OsmC
AUO97_RS10530	COG1846	K	DNA-bindingtranscriptionalregulator,MarRfamily		MarR
AUO97_RS10530	COG1846	K	DNA-bindingtranscriptionalregulator,MarRfamily		MarR
AUO97_RS10535
AUO97_RS10540	COG0388	C	Omega-amidaseYafV/Nit2,hydrolyzesalpha-ketoglutaramate		Nit2
AUO97_RS10545	COG1366	T	Anti-anti-sigmaregulatoryfactor(antagonistofanti-sigmafactor)		SpoIIAA
AUO97_RS10550	COG2208	T	PhosphoserinephosphataseRsbU,regulatorofsigmasubunit		RsbU
AUO97_RS10555	COG2853	M	LipoproteinsubunitMlaAoftheABC-typeintermembranephospholipidtransporterMla		MlaA
AUO97_RS10585	COG1508	K	DNA-directedRNApolymerasespecializedsigmasubunit,sigma54homolog	RNApolymerase	RpoN
AUO97_RS10590	COG1544	J	Ribosome-associatedtranslationinhibitorRaiA		RaiA
AUO97_RS10595	COG5007	T	AcidstressproteinIbaG/YrbA,BolA-likefamily		IbaG
AUO97_RS10600	COG0766	M	UDP-N-acetylglucosamineenolpyruvyltransferase	Mureinebiosynthesis	MurA
AUO97_RS10605	COG0040	E	ATPphosphoribosyltransferase	Histidinebiosynthesis	HisG
AUO97_RS10610	COG0141	E	Histidinoldehydrogenase	Histidinebiosynthesis	HisD
AUO97_RS10615	COG0079	E	Histidinol-phosphate/aromaticaminotransferaseorcobyricaciddecarboxylase	Cobalamine/B12biosynthesis	HisC
AUO97_RS10615	COG0079	E	Histidinol-phosphate/aromaticaminotransferaseorcobyricaciddecarboxylase	Cobalamine/B12biosynthesis	HisC
AUO97_RS10615	COG0079	E	Histidinol-phosphate/aromaticaminotransferaseorcobyricaciddecarboxylase	Cobalamine/B12biosynthesis	HisC
AUO97_RS10620	COG0147	E	Anthranilate/para-aminobenzoatesynthasescomponentI	Aromaticaminoacidbiosynthesis	TrpE
AUO97_RS10625
AUO97_RS10630	COG3271	U	Predicteddouble-glycineleaderpeptidase,C39-like(CLD)domain		C39G
AUO97_RS10640	COG2067	I	Long-chainfattyacidtransportprotein		FadL
AUO97_RS10650
AUO97_RS10655	COG1051	F	ADP-ribosepyrophosphataseYjhB,NUDIXfamily		YjhB
AUO97_RS10660	COG0494	V	8-oxo-dGTPpyrophosphataseMutTandrelatedhouse-cleaningNTPpyrophosphohydrolases,NUDIXfamily		MutT
AUO97_RS10665	COG0663	R	Carbonicanhydraseoracetyltransferase,isoleucinepatchsuperfamily		PaaY
AUO97_RS10670	COG1214	J	tRNAA37threonylcarbamoyladenosinemodificationproteinTsaB	tRNAmodification	TsaB
AUO97_RS10675
AUO97_RS10680
AUO97_RS10685	COG0627	V	S-formylglutathionehydrolaseFrmB		FrmB
AUO97_RS10690	COG3553	S	Uncharacterizedconservedprotein,DUF2218domain
AUO97_RS10695	COG0036	G	Pentose-5-phosphate-3-epimerase	Pentosephosphatepathway	Rpe
AUO97_RS10700	COG0561	H	HydroxymethylpyrimidinepyrophosphataseandotherHADfamilyphosphatases		Cof
AUO97_RS10705
AUO97_RS10710	COG2132	D	Multicopperoxidasewiththreecupredoxindomains(includescelldivisionproteinFtsPandsporecoatproteinCotA)		SufI
AUO97_RS10715	COG3667	P	Uncharacterizedconservedproteininvolvedincopperresistance		PcoB
AUO97_RS10720	COG1230	P	Co/Zn/Cdeffluxsystemcomponent		CzcD
AUO97_RS10725	COG2076	V	MultidrugtransporterEmrEandrelatedcationtransporters		EmrE
AUO97_RS10730	COG0350	L	DNArepairenzymeAda(O6-methylguanine-DNA--protein-cysteinemethyltransferase)		AdaB
AUO97_RS10735	COG1364	E	GlutamateN-acetyltransferase(ornithinetransacetylase)	Argininebiosynthesis	ArgJ
AUO97_RS10740	COG0379	H	Quinolinatesynthase	NADbiosynthesis	NadA
AUO97_RS10765	COG1816	F	Adenosinedeaminase	Menaquinonebiosynthesis	Add
AUO97_RS10770	COG1063	E	ThreoninedehydrogenaseorrelatedZn-dependentdehydrogenase	Non-phosphorylatedEntner-Doudoroffpathway	Tdh
AUO97_RS10775	COG0583	K	DNA-bindingtranscriptionalregulator,LysRfamily		LysR
AUO97_RS10780	COG1960	I	Acyl-CoAdehydrogenaserelatedtothealkylationresponseproteinAidB	Fattyacidbiosynthesis	CaiA
AUO97_RS10785	COG2271	G	Sugarphosphatepermease		UhpC
AUO97_RS10785	COG2271	G	Sugarphosphatepermease		UhpC
AUO97_RS10785	COG2271	G	Sugarphosphatepermease		UhpC
AUO97_RS10790	COG1804	I	Crotonobetainyl-CoA:carnitineCoA-transferaseCaiBandrelatedacyl-CoAtransferases		CaiB
AUO97_RS10790	COG1804	I	Crotonobetainyl-CoA:carnitineCoA-transferaseCaiBandrelatedacyl-CoAtransferases		CaiB
AUO97_RS10790	COG1804	I	Crotonobetainyl-CoA:carnitineCoA-transferaseCaiBandrelatedacyl-CoAtransferases		CaiB
AUO97_RS10795	COG1145	C	Ferredoxin		NapF
AUO97_RS10800	COG1053	C	Succinatedehydrogenase/fumaratereductase,flavoproteinsubunit	TCAcycle	SdhA
AUO97_RS10805	COG0583	K	DNA-bindingtranscriptionalregulator,LysRfamily		LysR
AUO97_RS10810	COG0725	P	ABC-typemolybdatetransportsystem,periplasmicMo-bindingproteinModA	Molybdopterinbiosynthesis	ModA
AUO97_RS10815	COG2814	G	PredictedarabinoseeffluxpermeaseAraJ,MFSfamily		AraJ
AUO97_RS10825	COG0583	K	DNA-bindingtranscriptionalregulator,LysRfamily		LysR
AUO97_RS10825	COG0583	K	DNA-bindingtranscriptionalregulator,LysRfamily		LysR
AUO97_RS10850	COG1280	E	Threonine/homoserine/homoserinelactoneeffluxprotein		RhtB
AUO97_RS10855	COG0583	K	DNA-bindingtranscriptionalregulator,LysRfamily		LysR
AUO97_RS10860
AUO97_RS10865	COG0620	E	MethioninesynthaseII(cobalamin-independent)	Methioninebiosynthesis	MetE
AUO97_RS10870	COG1853	C	FMNreductaseRutF,DIM6/NTABfamily	Pyrimidinedegradation	RutF
AUO97_RS10905
AUO97_RS10910	COG1309	K	DNA-bindingprotein,AcrRfamily,includesnucleoidocclusionproteinSlmA		AcrR
AUO97_RS10915
AUO97_RS10920	COG0208	F	Ribonucleotidereductasebetasubunit,ferritin-likedomain	Pyrimidinesalvage	NrdB
AUO97_RS10925
AUO97_RS10930	COG1328	F	Anaerobicribonucleoside-triphosphatereductase	Thymidylatebiosynthesis	NrdD
AUO97_RS10935	COG0745	T	DNA-bindingresponseregulator,OmpRfamily,containsRECandwinged-helix(wHTH)domain		OmpR
AUO97_RS10935	COG0745	T	DNA-bindingresponseregulator,OmpRfamily,containsRECandwinged-helix(wHTH)domain		OmpR
AUO97_RS10940	COG0642	T	Signaltransductionhistidinekinase		BaeS
AUO97_RS10945
AUO97_RS10950	COG2199	T	GGDEFdomain,diguanylatecyclase(c-di-GMPsynthetase)oritsenzymaticallyinactivevariants		GGDEF
AUO97_RS10955	COG0838	C	NADH:ubiquinoneoxidoreductasesubunit3(chainA)	NADHdehydrogenase	NuoA
AUO97_RS10960	COG0377	C	NADH:ubiquinoneoxidoreductase20kDsubunit(chainB)orrelatedFe-Soxidoreductase	NADHdehydrogenase	NuoB
AUO97_RS10965	COG0852	C	NADH:ubiquinoneoxidoreductase27kDsubunit(chainC)	NADHdehydrogenase	NuoC
AUO97_RS10970	COG1905	C	NADH:ubiquinoneoxidoreductase24kDsubunit(chainE)	NADHdehydrogenase	NuoE
AUO97_RS10975	COG1894	C	NADH:ubiquinoneoxidoreductase,NADH-binding51kDsubunit(chainF)	NADHdehydrogenase	NuoF
AUO97_RS10980	COG1034	C	NADHdehydrogenase/NADH:ubiquinoneoxidoreductase75kDsubunit(chainG)	NADHdehydrogenase	NuoG
AUO97_RS10985	COG1005	C	NADH:ubiquinoneoxidoreductasesubunit1(chainH)	NADHdehydrogenase	NuoH
AUO97_RS10990	COG1143	C	Formatehydrogenlyasesubunit6/NADH:ubiquinoneoxidoreductase23kDsubunit(chainI)	NADHdehydrogenase	NuoI
AUO97_RS10995	COG0839	C	NADH:ubiquinoneoxidoreductasesubunit6(chainJ)	NADHdehydrogenase	NuoJ
AUO97_RS11000	COG0713	C	NADH:ubiquinoneoxidoreductasesubunit11or4L(chainK)	NADHdehydrogenase	NuoK
AUO97_RS11005	COG1009	C	MembraneH+-translocase/NADH:ubiquinoneoxidoreductasesubunit5(chainL)/MultisubunitNa+/H+antiporter,MnhAsubunit	NADHdehydrogenase	NuoL
AUO97_RS11010	COG1008	C	NADH:ubiquinoneoxidoreductasesubunit4(chainM)	NADHdehydrogenase	NuoM
AUO97_RS11015	COG1007	C	NADH:ubiquinoneoxidoreductasesubunit2(chainN)	NADHdehydrogenase	NuoN
AUO97_RS11020	COG0035	F	Uracilphosphoribosyltransferase	Pyrimidinesalvage	Upp
AUO97_RS11025	COG1278	K	Coldshockprotein,CspAfamily		CspC
AUO97_RS11035	COG0583	K	DNA-bindingtranscriptionalregulator,LysRfamily		LysR
AUO97_RS11040	COG1018	C	Flavodoxin/ferredoxin--NADPreductase		Fpr
AUO97_RS11045
AUO97_RS11050
AUO97_RS11055
AUO97_RS11060	COG2081	R	PredictedflavoproteinYhiN		YhiN
AUO97_RS11065	COG2515	E	1-aminocyclopropane-1-carboxylatedeaminase/D-cysteinedesulfhydrase,PLP-dependentACCfamily		Acd
AUO97_RS11070	COG1566	V	MultidrugresistanceeffluxpumpEmrA		EmrA
AUO97_RS11075
AUO97_RS11080	COG1309	K	DNA-bindingprotein,AcrRfamily,includesnucleoidocclusionproteinSlmA		AcrR
AUO97_RS11085	COG1280	E	Threonine/homoserine/homoserinelactoneeffluxprotein		RhtB
AUO97_RS11090
AUO97_RS11095	COG0143	J	Methionyl-tRNAsynthetase	Aminoacyl-tRNAsynthetases	MetG
AUO97_RS11100
AUO97_RS11105	COG0489	D	Fe-SclustercarrierATPase,Mrp/ApbC/NBP35family		Mrp
AUO97_RS11115	COG0775	F	Nucleosidephosphorylase/nucleosidase,includes5'-methylthioadenosine/S-adenosylhomocysteinenucleosidaseMtnNandfutalosinehydrolaseMqnB	Menaquinonebiosynthesis	MtnN
AUO97_RS11120	COG3216	S	Uncharacterizedconservedprotein,DUF2062family
AUO97_RS11125	COG1280	E	Threonine/homoserine/homoserinelactoneeffluxprotein		RhtB
AUO97_RS11130	COG0717	F	dCTPdeaminase	Thymidylatebiosynthesis	Dcd
AUO97_RS11135
AUO97_RS11140
AUO97_RS11145
AUO97_RS11150
AUO97_RS11155
AUO97_RS11160	COG0042	J	tRNA-dihydrouridinesynthase	tRNAmodification	DusA
AUO97_RS11165	COG4137	R	ABC-typeuncharacterizedtransportsystem,permeasecomponent		YpjD
AUO97_RS11170	COG0541	U	SignalrecognitionparticleGTPase		Ffh
AUO97_RS11175	COG1521	H	PantothenatekinasetypeIII		CoaX
AUO97_RS11180	COG0340	H	Biotin-(acetyl-CoAcarboxylase)ligase	Biotinbiosynthesis	BirA2
AUO97_RS11185	COG0730	P	SulfiteexporterTauE/SafE/YfcAandrelatedpermeases,UPF0721family		TauE
AUO97_RS11190	COG1802	K	DNA-bindingtranscriptionalregulator,GntRfamily		GntR
AUO97_RS11195	COG1196	D	ChromosomesegregationATPaseSmc		Smc
AUO97_RS11195	COG1196	D	ChromosomesegregationATPaseSmc		Smc
AUO97_RS11200	COG3115	D	CelldivisionproteinZipA,interactswithFtsZ		ZipA
AUO97_RS11205	COG0272	L	NAD-dependentDNAligase		Lig
AUO97_RS11210	COG2193	P	Bacterioferritin(cytochromeb1)		Bfr
AUO97_RS11215	COG0738	G	Fucosepermease		FucP
AUO97_RS11220	COG0380	G	Trehalose-6-phosphatesynthase,GT20family		OtsA
AUO97_RS11225	COG1877	G	Trehalose-6-phosphatephosphatase		OtsB
AUO97_RS11230
AUO97_RS11235	COG0161	H	Adenosylmethionine-8-amino-7-oxononanoateaminotransferase	Biotinbiosynthesis	BioA
AUO97_RS11240	COG0156	H	7-keto-8-aminopelargonatesynthetaseorrelatedenzyme	Biotinbiosynthesis	BioF
AUO97_RS11245	COG4106	C	Trans-aconitatemethyltransferase		Tam
AUO97_RS11250	COG0132	H	Dethiobiotinsynthetase	Biotinbiosynthesis	BioD
AUO97_RS11255	COG1187	J	PseudouridylatesynthaseRsuA,specificfor16SrRNAU516and23SrRNAU2605	16SrRNAmodification	RsuA
AUO97_RS11260	COG1386	K	ChromosomesegregationandcondensationproteinScpB		ScpB
AUO97_RS11265	COG1354	L	ChromatinsegregationandcondensationproteinRec8/ScpA/Scc1,kleisinfamily		ScpA
AUO97_RS11270	COG0009	J	tRNAA37threonylcarbamoyladenosinesynthetasesubunitTsaC/SUA5/YrdC	tRNAmodification	TsaC
AUO97_RS11275	COG3101	J	ElongationfactorPhydroxylaseEpmC(EF-Pbeta-lysylationpathway)		EpmC
AUO97_RS11280	COG1399	J	23SrRNAaccumulationproteinYceD(essentialinplants,uncharacterizedinbacteria)		YceD
AUO97_RS11285	COG0333	J	RibosomalproteinL32	Ribosome50Ssubunit	RpmF
AUO97_RS11290	COG0331	I	MalonylCoA-acylcarrierproteintransacylase	Fattyacidbiosynthesis	FabD
AUO97_RS11295	COG1028	I	NAD(P)-dependentdehydrogenase,short-chainalcoholdehydrogenasefamily	Fattyacidbiosynthesis	FabG
AUO97_RS11295	COG1028	I	NAD(P)-dependentdehydrogenase,short-chainalcoholdehydrogenasefamily	Fattyacidbiosynthesis	FabG
AUO97_RS11300	COG0236	I	Acylcarrierprotein	Fattyacidbiosynthesis	AcpP
AUO97_RS11305	COG1652	P	Cytoplasmicpotassium-bindingproteinKbp/XkdP/YgaU,containsLysMdomain		XkdP
AUO97_RS11310	COG0351	H	Hydroxymethylpyrimidine/phosphomethylpyrimidinekinase	Thiaminebiosynthesis	ThiD
AUO97_RS11315	COG0546	C	Phosphoglycolatephosphatase,HADsuperfamily		Gph
AUO97_RS11320	COG0108	H	3,4-dihydroxy-2-butanone4-phosphatesynthase	Riboflavin/FADbiosynthesis	RibB
AUO97_RS11325
AUO97_RS11330	COG4929	S	Uncharacterizedmembrane-anchoredprotein
AUO97_RS11335	COG0853	H	Aspartate1-decarboxylase	Pantothenate/CoAbiosynthesis	PanD
AUO97_RS11340	COG0193	J	Peptidyl-tRNAhydrolase	Translationfactors	Pth
AUO97_RS11345	COG1825	J	RibosomalproteinL25(generalstressproteinCtc)	Ribosome50Ssubunit	RplY
AUO97_RS11350	COG0462	F	Phosphoribosylpyrophosphatesynthetase	Histidinebiosynthesis,Purinebiosynthesis	PrsA
AUO97_RS11375	COG1947	I	4-diphosphocytidyl-2C-methyl-D-erythritolkinase	Isoprenoidbiosynthesis	IspE
AUO97_RS11380	COG3017	M	OutermembranelipoproteinLolB,involvedinoutermembranebiogenesis		LolB
AUO97_RS11385	COG5010	U	FlppilusassemblyproteinTadD,containsTPRrepeats		TadD
AUO97_RS11390	COG0373	H	Glutamyl-tRNAreductase	Hemebiosynthesis	HemA
AUO97_RS11395	COG0358	L	DNAprimase(bacterialtype)		DnaG
AUO97_RS11400	COG4105	M	OutermembraneproteinassemblyfactorBamD,BamD/ComLfamily		BamD
AUO97_RS11405	COG0564	J	PseudouridinesynthaseRluA,23SrRNA-ortRNA-specific	23SrRNAmodification	RluA
AUO97_RS11410	COG1496	P	Copperoxidase(laccase)domain		YfiH
AUO97_RS11415	COG0655	C	MultimericflavodoxinWrbA,includesNAD(P)H:quinoneoxidoreductase		WrbA
AUO97_RS11420	COG0691	O	tmRNA-bindingprotein		SmpB
AUO97_RS11425	COG0669	H	Phosphopantetheineadenylyltransferase	Pantothenate/CoAbiosynthesis	CoaD
AUO97_RS11430	COG1143	C	Formatehydrogenlyasesubunit6/NADH:ubiquinoneoxidoreductase23kDsubunit(chainI)	NADHdehydrogenase	NuoI
AUO97_RS11445
AUO97_RS11445
AUO97_RS11450	COG0583	K	DNA-bindingtranscriptionalregulator,LysRfamily		LysR
AUO97_RS11455	COG0473	C	Isocitrate/isopropylmalatedehydrogenase	TCAcycle	LeuB
AUO97_RS11460	COG1292	M	Choline-glycinebetainetransporter		BetT
[truncated: 1,497 more rows]
